# Supplementary material for: Palladium-catalyzed R2(O)P directed C(sp2)–H acetoxylation
Source: Royal Society of Chemistry journal article supplement (doi:10.1039/c4cc01238k), 2014-01-01
Supplement: c4cc01238k1.pdf [file c4cc01238k1.pdf]

## Supporting Information

### Palladium-Catalyzed $R_2(O)P$ Directed $C(sp^2)$ -H Acetoxylation

Heng Zhang,<sup>a</sup> Rong-Bin Hu,<sup>a</sup> Xiao-Yu Zhang,<sup>a</sup> Shi-Xia Li,<sup>a</sup> Shang-Dong Yang<sup>\*a,b</sup>

<sup>a</sup>State Key Laboratory of Applied Organic Chemistry, Lanzhou University, Lanzhou 730000, P. R. China.

<sup>b</sup>State Key Laboratory for Oxo Synthesis and Selective Oxidation, Lanzhou Institute of Chemical Physics, Chinese Academy of Sciences, Lanzhou, 730000, P. R. China.

## Supporting Information

### Table of Contents

|                                                                                |     |
|--------------------------------------------------------------------------------|-----|
| I. General methods and materials .....                                         | S2  |
| II. Typical procedures for the synthesis of substrates .....                   | S2  |
| III. General procedures for the preparation of the acetoxylated compounds..... | S3  |
| IV. Typical procedure for the preparation of ( <i>R</i> )-MeO-MOP.....         | S3  |
| V. Characterization of the product .....                                       | S4  |
| VI. References .....                                                           | S10 |
| VII. NMR charts .....                                                          | S11 |
| VIII. Copies of HPLC spectra.....                                              | S48 |

## I. General Methods and Materials

$^1\text{H}$  and  $^{13}\text{C}$  NMR spectra were recorded on a Bruker advance III 400 spectrometer (400 MHz for  $^1\text{H}$  and 100 MHz for  $^{13}\text{C}$ ) in  $\text{CDCl}_3$  with TMS as internal standard. Chemical shifts ( $\delta$ ) were measured in ppm relative to TMS  $\delta = 0$  for  $^1\text{H}$ , or to chloroform  $\delta = 77.0$  for  $^{13}\text{C}$  as internal standard.  $^{31}\text{P}$  NMR spectra and  $^{19}\text{F}$  NMR were recorded on the same instrument. Data are reported as follows: Chemical shift, multiplicity (s = singlet, d = double, t = triplet, q = quartet, m = multiplet), Coupling constants,  $J$ , are reported in hertz. Mass data were measured with Thermo Scientific DSQ II mass spectrometer. The starting materials were purchased from Aldrich, Acros Organics, J&K Chemicals or TCI and used without further purification. Solvents were dried and purified according to the procedure from "Purification of Laboratory Chemicals book". Thin-layer chromatography (TLC) was performed using 60 mesh silica gel plates visualized with short-wavelength UV light (254 nm). Enantioselectivities were determined by high performance liquid chromatography (HPLC) analysis employing a Darcel Chiracel AD-H column. Substrates [1,1'-biphenyl]-2-ylidiphenylphosphine oxide were prepared according to literature methods A<sup>[1]</sup> and methods B<sup>[2]</sup>.

## II. Typical Procedures for the Synthesis of Substrates

### Method A

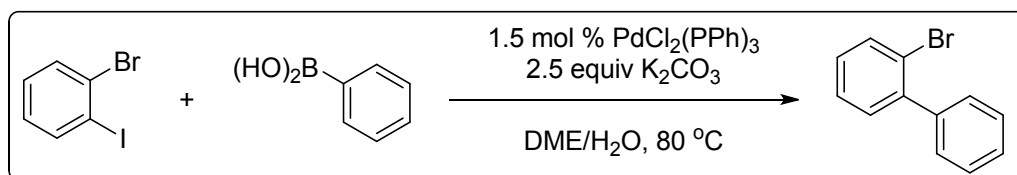

Water (4.0 mL) and DME (30.0 mL) were poured into a round-bottomed flask, fitted with a condenser and argon flow, and bubbled through with argon. Potassium carbonate (3.45 g, 25 mmol), 1-bromo-2-iodobenzene (2.8 g, 10.0 mmol), substituted phenylboronic acid (10.5 mmol), and bis(triphenylphosphine)palladium(II) chloride (105 mg, 0.15 mmol) were added to the mixture, which was stirred at  $80^\circ\text{C}$  for 5 h in an oil bath until substrate disappeared as judged by TLC. The reaction mixture was allowed to cool to r.t., DME was evaporated, and water (40.0 mL) and ether (20.0 mL) were added. The layers were separated and the aqueous layer was extracted with diethylether (3 x 20.0 mL). The combined organic layers were washed with brine, dried over magnesium sulfate, filtered, and evaporated in vacuo to obtain a yellow oil, which was purified further using column chromatography on silica gel (eluent: heptane 30% EtOAc in heptane). The title compound was isolated as a white amorphous solid (2.10 g, 90%).

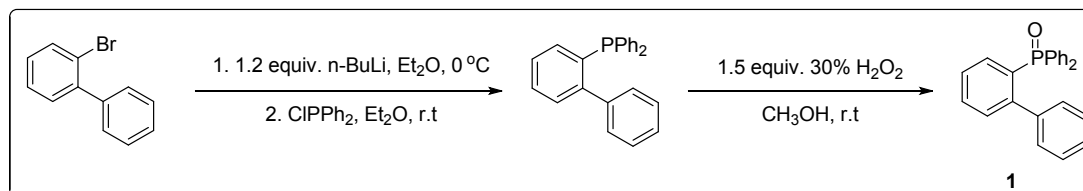

4.0 mL (9.60 mmol) of  $n\text{-BuLi}$  in  $n\text{-hexane}$  (2.40 M) were added dropwise to a suspension of (8.0 mmol) of 2-bromo-1, 1'-biphenyl in 24 mL of diethyl ether at  $0^\circ\text{C}$ . The resulting beige-colored suspension was stirred for an additional 2 h at  $0^\circ\text{C}$ . Then, freshly distilled  $\text{Ph}_2\text{PCl}$  (1.77 g, 8.0 mmol) was added dropwise in diethyl ether (16.0 mL). The mixture was then stirred at r.t. for 1 h, filtered and solvent was removed in vacuo to yield a residue, which was used without further purification. To the residue in MeOH (36.0 mL) was added dropwise at  $< 40^\circ\text{C}$  30 % aq.  $\text{H}_2\text{O}_2$  solution (1.63 mL, 16.0 mmol). The resulting clear solution was stirred at r.t. for 1 h, treated for 1 h with sat.  $\text{Na}_2\text{SO}_3$  solution (8.0 mL) and 1N HCl solution (5.0 mL), and the mixture was concentrated at the rotavapor to remove the

MeOH. The aqueous layer was extracted with  $\text{CH}_2\text{Cl}_2$  ( $3 \times 20$  ml). The extract was washed with brine and dried over  $\text{MgSO}_4$ , then concentrated under reduced pressure and purified by silica gel flash chromatography to afford the product as white powder.

#### Method B:

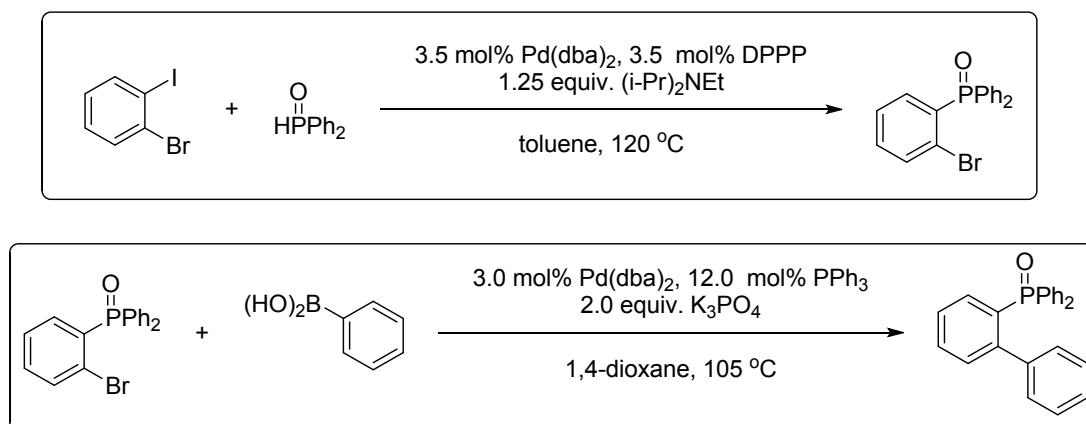

An oven-dried, 100 mL Schlenk tube equipped with a magnetic stir bar, a rubber septum and a reflux condenser was charged with diphenylphosphine oxide (6.86 g, 34.0 mmol),  $\text{Pd}(\text{dba})_2$  (0.56 g, 1.2 mmol) and DPPP (0.42 g, 1.2 mmol) in 50.0 mL toluene. 1,2-Bromo-iodobenzene (5.2 mL, 41 mmol), and  $(i\text{-Pr})_2\text{NEt}$  (7.4 mL, 43 mmol) was added via syringe and the mixture refluxed at  $120^\circ\text{C}$  for 4 days. After cooling to room temperature, the product was partitioned between 100.0 mL  $\text{CHCl}_3$  and 50.0 mL  $\text{H}_2\text{O}$ . The phases were separated and the organic layer was washed with brine (50.0 mL), dried over  $\text{MgSO}_4$  and evaporated in vacuo to give a pale orange precipitate. Purification by flash chromatography (2:1 EtOAc/hexane) gave the title compound as a white solid (7.90 g, 65% yield).

To a Schlenk tube were charged (2-bromophenyl)diphenylphosphine oxide (0.50 g, 1.4 mmol) and arylboronic acid (1.4 mmol) together with  $\text{Pd}(\text{dba})_2$  (24 mg, 0.04 mmol),  $\text{PPh}_3$  (44 mg, 0.17 mmol) and  $\text{K}_3\text{PO}_4$  (0.59 g, 2.8 mmol) in 5.0 mL of dioxane under an atmosphere of argon. The Schlenk tube was stirred at  $105^\circ\text{C}$  for 12 h and cooled to room temperature. The mixture was diluted with water (10 mL) and extracted with  $\text{CHCl}_3$  ( $3 \times 20.0$  mL). The combined organic extracts were washed with brine, dried over  $\text{MgSO}_4$  and evaporated in vacuo. The crude product was purified by flash chromatography (2:1 EtOAc/hexane).

### III. General procedures for the preparation of the acetoxyated compounds:

Under air atmosphere, 2-diphenylphosphino-2'-methylbiphenyl (**1a**) (73.6 mg, 0.20 mmol, 1.0 equiv),  $\text{Pd}(\text{OAc})_2$  (4.48 mg, 0.02 mmol, 10.0 mol %) and  $\text{PhI}(\text{OAc})_2$  (193.2 mg, 0.60 mmol, 3.0 equiv) were added to tube containing a magnetic stir bar. After sealed tube, 2.0 mL  $\text{CF}_3\text{CH}_2\text{OH}$  was added using a syringe. The mixture was stirred at  $100^\circ\text{C}$  in an oil bath until substrate disappeared as judged by TLC. After cooling to room temperature, the solution was removed in vacuo to yield a residue, which was purified by silica gel using (1:1 EtOAc/hexane) to afford pure **2a** as oil (73 mg, 86%).

### IV. Typical procedure for the preparation of (R)-MeO-MOP

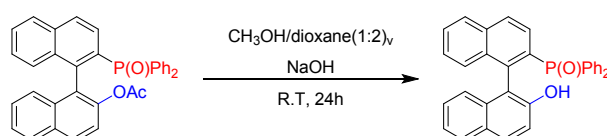

To a mixture of (*R*)-2'-(diphenylphosphoryl)-[1,1'-binaphthalen]-2-yl acetate (**2v**) (102.4 mg, 0.2 mmol) in CH<sub>3</sub>OH (1 mL) and dioxane (2 mL) was added NaOH (12.0 mg, 0.3 mmol). The mixture was stirred at room temperature for 24 h. The solvent was removed under reduced pressure and the crude product was purified by chromatography on silica gel with EtOAc/hexane (1:2) to yield (*R*)-(2'-hydroxy-[1,1'-binaphthalen]-2-yl)diphenylphosphine oxide (**2va**) as a white solid (68.8 mg, 73%)<sup>[3]</sup>.

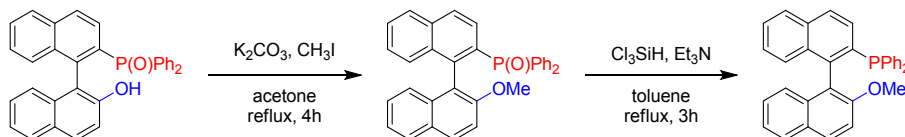

To a mixture of (*R*)-(2'-hydroxy-[1,1'-binaphthalen]-2-yl)diphenylphosphine oxide (**2va**) (92.3 mg, 0.2 mmol) and K<sub>2</sub>CO<sub>3</sub> (170 mg, 1.23 mmol) in acetone (3 mL) was added CH<sub>3</sub>I (85.0 mg, 0.60 mmol). The mixture was stirred and heated under reflux for 4 h and cooled to room temperature. The solvent was removed and the residue was dissolved in a saturated solution of Na<sub>2</sub>CO<sub>3</sub>. The aqueous solution was extracted with EtOAc. The organic phase was washed with H<sub>2</sub>O and brine, dried over MgSO<sub>4</sub>, and concentrated under reduced pressure. The crude product was purified by chromatography on silica gel with EtOAc/hexane (1:4) to yield (*R*)-(2'-methoxy-[1,1'-binaphthalen]-2-yl)diphenylphosphine oxide (**2ub**) as a white solid (91.9 mg, 95%). To a mixture of (*R*)-(2'-methoxy-[1,1'-binaphthalen]-2-yl)diphenylphosphine oxide (**2vb**) (96.8 mg, 0.2 mmol) and triethylamine (0.56 mL, 4.0 mmol) in xylene (3.3 mL) was added trichlorosilane (0.10 mL, 1.00 mmol) at 0 °C, the mixture was refluxed under Ar for 3 h. After being cooled to room temperature, the mixture was concentrated under reduced pressure. The crude product was purified by chromatography on silica gel with EtOAc/hexane (1:6) to yield (*R*)-(2'-methoxy-[1,1'-binaphthalen]-2-yl)diphenylphosphine ((*R*)-MeO-MOP) as a white solid (72.1 mg, 77%)<sup>[4]</sup>.

## V. Characterization of the Products

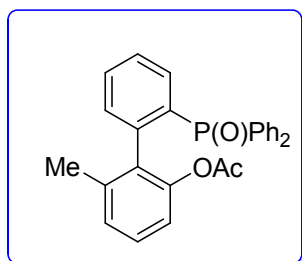

Yellow oil. <sup>1</sup>H NMR (400 MHz, CDCl<sub>3</sub>) δ: 1.78 (s, 3.0 H), 1.95 (s, 3.0 H), 6.59 (d, *J* = 8.0 Hz, 1.0 H), 6.93 (d, *J* = 4.0 Hz, 1.0 H), 7.09 (t, *J* = 8.0 Hz, 1 H), 7.13-7.16 (m, 1 H), 7.26-7.32 (m, 2 H), 7.36-7.40 (m, 4 H), 7.42-7.56 (m, 6 H), 7.61-7.66 (m, 2 H); <sup>13</sup>C NMR (100 MHz, CDCl<sub>3</sub>) δ: 20.55, 20.65, 118.86, 127.06, 127.14, 127.18, 127.81, 127.93, 128.14, 128.26, 128.54, 131.21, 131.24, 131.30, 131.46, 131.48, 131.55, 131.65, 131.68, 131.72, 131.81, 131.97, 132.06, 132.31, 132.62, 132.66, 132.72, 132.99, 133.71, 133.75, 133.83, 139.13, 141.30, 141.38, 148.04, 169.38; <sup>31</sup>P NMR (162 MHz, CDCl<sub>3</sub>) δ: 26.65; **MS (ESI)**: found [M+H]<sup>+</sup>427.14.

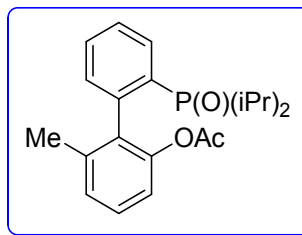

Yellow oil. <sup>1</sup>H NMR (400 MHz, CDCl<sub>3</sub>) δ: 1.05-1.21 (m, 12.0 H), 1.82 (s, 3.0 H), 2.06 (s, 3.0 H), 2.06-2.13 (m, 1H), 2.19-2.28 (m, 1H), 6.91 (d, *J* = 8.0 Hz, 1.0 H), 7.13-7.17 (m, 2.0 H), 7.27 (t, *J* = 12.0 Hz, 1H), 7.42-7.52 (m, 2H), 7.62 (t, *J* = 20.0 Hz, 1H); <sup>13</sup>C NMR (100 MHz, CDCl<sub>3</sub>) δ: 15.69 (d, *J* = 4.0 Hz), 16.98 (d, *J* = 12.0 Hz), 20.47, 20.57, 26.33, 26.99, 27.48, 28.14, 119.12, 124.66, 126.76, 126.86, 127.21, 127.83, 128.19, 128.82, 129.80, 130.61, 130.73, 130.76,

131.47, 131.57, 132.00, 132.09, 133.88, 133.91, 138.51, 141.75, 141.80, 148.03, 169.42; **<sup>31</sup>P NMR** (162 MHz, CDCl<sub>3</sub>) δ: 51.02; **MS (ESI):** found [M+H]<sup>+</sup>359.17.

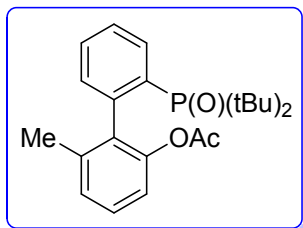

Yellow oil. **<sup>1</sup>H NMR** (400 MHz, CDCl<sub>3</sub>) δ: 1.80 (s, 3.0 H), 2.10 (s, 3.0 H), 6.85 (d, *J* = 8.0 Hz, 1 H), 7.10 (d, *J* = 8.0 Hz, 1 H), 7.15-7.18 (q, 1 H), 7.22-7.27 (q, 1 H), 7.37-7.41 (m, 1 H), 7.45-7.49 (t, *J* = 16.0 Hz, 1.0 H), 7.65-7.70 (t, *J* = 20.0 Hz, 1.0 H); **<sup>13</sup>C NMR** (100 MHz, CDCl<sub>3</sub>) δ: 20.59, 20.85, 27.53, 27.97, 37.02, 37.55, 37.86, 38.13, 118.70, 125.59, 125.70, 126.95, 127.74, 130.26, 131.02, 131.49, 131.61, 132.83, 132.92, 134.49, 134.51, 137.71, 143.48, 143.51, 147.51, 169.63; **<sup>31</sup>P NMR** (162 MHz, CDCl<sub>3</sub>) δ: 53.30; **MS (ESI):** found [M+H]<sup>+</sup>387.20.

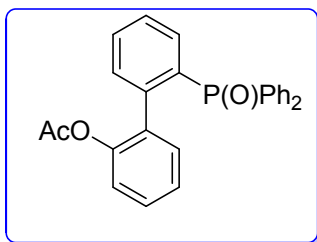

Yellow oil. **<sup>1</sup>H NMR** (400 MHz, CDCl<sub>3</sub>) δ: 1.95 (s, 3 H), 6.68-6.70 (t, 1 H), 7.00-7.04 (m, 1 H), 7.11-7.15 (m, 1 H), 7.22-7.31 (m, 4 H), 7.35-7.41 (m, 4 H), 7.45-7.51 (m, 5 H), 7.63-7.68 (m, 2 H); **<sup>13</sup>C NMR** (100 MHz, CDCl<sub>3</sub>) δ: 20.74, 121.77, 124.80, 127.15, 127.27, 127.87, 127.99, 128.19, 128.31, 128.96, 131.11, 131.14, 131.23, 131.33, 131.41, 131.55, 131.65, 131.96, 132.06, 132.14, 132.45, 132.6, 133.17, 133.44, 133.82, 133.93, 142.09, 142.17, 147.60; **<sup>31</sup>P NMR** (162 MHz, CDCl<sub>3</sub>) δ: 27.31; **MS (ESI):** found [M+H]<sup>+</sup>413.14.

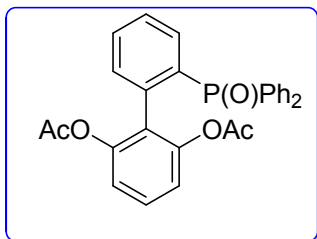

Yellow oil. **<sup>1</sup>H NMR** (400 MHz, CDCl<sub>3</sub>) δ: 1.84 (s, 6 H), 6.82-6.84 (d, *J* = 8.0 Hz), 7.16-7.20 (m, 2 H), 7.22-7.27 (m, 1 H), 7.33-7.37 (m, 4 H), 7.41-7.47 (m, 3 H), 7.49-7.53 (m, 1 H), 7.55-7.60 (m, 5 H); **<sup>13</sup>C NMR** (100 MHz, CDCl<sub>3</sub>) δ: 20.50, 119.43, 126.73, 126.77, 127.49, 127.61, 127.93, 128.05, 128.89, 131.24, 131.26, 131.34, 131.37, 131.88, 131.91, 131.97, 132.01, 132.40, 132.45, 133.46, 133.49, 133.57, 136.80, 136.87, 148.95, 168.71; **<sup>31</sup>P NMR** (162 MHz, CDCl<sub>3</sub>) δ: 27.33; **MS (ESI):** found [M+H]<sup>+</sup>471.14.

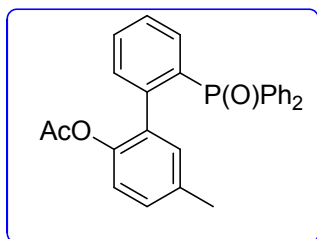

Yellow oil. **<sup>1</sup>H NMR** (400 MHz, CDCl<sub>3</sub>) δ: 1.95 (s, 3 H), 2.15 (s, 3 H), 6.62 (d, *J* = 8.0 Hz, 1 H), 6.90 (d, *J* = 4.0 Hz, 1 H), 6.93 (s, 1 H), 7.23 (q, *J*<sub>1</sub> = 4.0 Hz, *J*<sub>2</sub> = 8.0 Hz), 7.27-7.31 (m, 2 H), 7.36-7.39 (m, 2 H), 7.45-7.56 (m, 5 H), 7.61-7.66 (m, 2 H); **<sup>13</sup>C NMR** (100 MHz, CDCl<sub>3</sub>) δ: 20.67, 20.74, 121.51, 127.07, 127.19, 127.88, 128.00, 128.14, 128.26, 129.50, 131.15, 131.29, 131.32, 131.29, 131.32, 131.39, 131.48, 131.58, 131.61, 131.88, 131.98, 132.04, 132.19, 132.63, 132.91, 133.23, 133.68, 133.80, 133.92, 134.31, 142.19, 142.27, 145.54, 169.86; **<sup>31</sup>P NMR** (162 MHz, CDCl<sub>3</sub>) δ: 27.39; **MS (ESI):** found [M+H]<sup>+</sup>427.14.

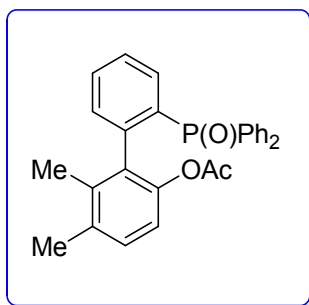

Yellow oil.  $^1\text{H NMR}$  (400 MHz,  $\text{CDCl}_3$ )  $\delta$ : 1.69 (s, 3 H), 1.80 (s, 3 H), 2.09 (s, 3 H), 6.54 (d,  $J = 8.0$  Hz, 1 H), 6.96 (d,  $J = 8.0$  Hz, 1 H), 7.12 (q,  $J = 4.0$  Hz, 1 H), 7.26-7.30 (m, 2 H), 7.34-7.41 (m, 4 H), 7.44 (t,  $J = 4.0$  Hz, 1 H), 7.48 (t,  $J = 4.0$  Hz, 1 H), 7.50-7.53 (m, 3 H), 7.57-7.66 (m, 3 H);  $^{13}\text{C NMR}$  (100 MHz,  $\text{CDCl}_3$ )  $\delta$ : 17.52, 19.82, 20.44, 118.40, 126.92, 127.05, 127.59, 127.71, 127.91, 128.02, 129.91, 131.08, 131.11, 131.31, 131.33, 131.46, 131.56, 131.63, 131.72, 131.81, 131.91, 132.19, 132.22, 132.48, 132.60, 133.51, 133.68, 133.79, 133.91, 136.99, 141.63, 141.71, 146.24, 169.57;  $^{31}\text{P NMR}$  (162 MHz,  $\text{CDCl}_3$ )  $\delta$ : 27.33; **MS (ESI)**: found  $[\text{M}+\text{H}]^+$  441.16.

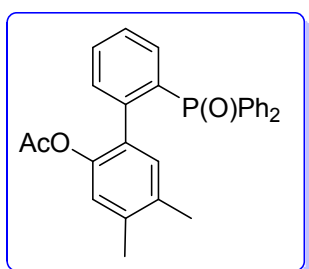

Yellow oil.  $^1\text{H NMR}$  (400 MHz,  $\text{CDCl}_3$ )  $\delta$ : 1.96 (s, 3 H), 2.03 (s, 3 H), 2.11 (s, 3 H), 6.48 (s, 1 H), 6.87 (s, 1 H), 7.22-7.29 (m, 3 H), 7.36-7.39 (m, 4 H), 7.45-7.55 (m, 5 H), 7.60-7.65 (m, 2 H);  $^{13}\text{C NMR}$  (100 MHz,  $\text{CDCl}_3$ )  $\delta$ : 18.87, 19.41, 20.66, 122.60, 126.92, 127.04, 127.65, 127.77, 127.98, 128.10, 129.49, 129.53, 130.89, 131.23, 131.32, 131.48, 131.58, 131.79, 131.88, 132.20, 132.61, 132.66, 132.91, 133.10, 133.24, 133.70, 133.76, 133.87, 137.40, 142.02, 142.10, 145.41, 169.97;  $^{31}\text{P NMR}$  (162 MHz,  $\text{CDCl}_3$ )  $\delta$ : 27.60; **MS (ESI)**: found  $[\text{M}+\text{Na}]^+$  463.14.

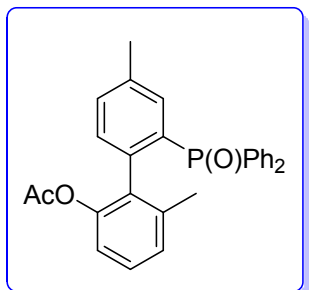

Dark oil.  $^1\text{H NMR}$  (400 MHz,  $\text{CDCl}_3$ )  $\delta$ : 1.84 (s, 3 H), 1.91 (s, 3 H), 2.35 (s, 3 H), 6.56 (d,  $J = 8.0$  Hz, 1 H), 6.87 (d,  $J = 8.0$  Hz, 1 H), 7.00-7.07 (m, 2 H), 7.26-7.29 (m, 2 H), 7.33-7.40 (m, 3 H), 7.43 (s, 1 H), 7.45-7.51 (m, 4 H), 7.60-7.65 (m, 2 H);  $^{13}\text{C NMR}$  (100 MHz,  $\text{CDCl}_3$ )  $\delta$ : 20.51, 21.05, 21.19, 118.84, 127.03, 127.72, 127.84, 128.01, 128.13, 128.32, 130.49, 131.14, 131.17, 131.40, 131.51, 131.66, 131.76, 131.8, 131.98, 132.51, 132.54, 132.77, 133.57, 134.16, 134.28, 136.80, 136.92, 137.38, 138.01, 138.09, 139.12, 148.08, 169.28;  $^{31}\text{P NMR}$  (162 MHz,  $\text{CDCl}_3$ )  $\delta$ : 23.00; **MS (ESI)**: found  $[\text{M}+\text{H}]^+$  441.16.

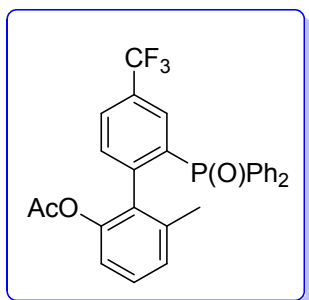

Yellow oil.  $^1\text{H NMR}$  (400 MHz,  $\text{CDCl}_3$ )  $\delta$ : 1.80 (s, 3 H), 1.92 (s, 3 H), 6.61 (d,  $J = 8.0$  Hz, 1 H), 6.95 (d,  $J = 8.0$  Hz, 1 H), 7.13 (t,  $J = 8.0$  Hz, 1 H), 7.29-7.35 (m, 3 H), 7.35-7.43 (m, 3 H), 7.44-7.53 (m, 3 H), 7.60-7.65 (m, 2 H), 7.78-

7.82 (m, 2 H);  $^{13}\text{C}$  NMR (100 MHz,  $\text{CDCl}_3$ )  $\delta$ : 20.54, 20.57, 119.01, 122.23, 124.95, 127.28, 128.02, 128.14, 128.23, 128.26, 128.38, 128.51, 129.10, 129.37, 129.49, 129.70, 129.82, 130.24, 130.28, 130.32, 130.37, 130.40, 130.89, 131.37, 131.40, 131.58, 131.63, 131.66, 131.76, 131.88, 131.94, 131.97, 132.31, 132.41, 132.62, 133.29, 134.28, 138.86, 145.30, 145.37, 147.78, 169.14;  $^{31}\text{P}$  NMR (162 MHz,  $\text{CDCl}_3$ )  $\delta$ : 25.71;  $^{19}\text{F}$  NMR (376 MHz,  $\text{CDCl}_3$ )  $\delta$ : -62.74; **MS (ESI)**: found  $[\text{M}+\text{H}]^+$  495.13.

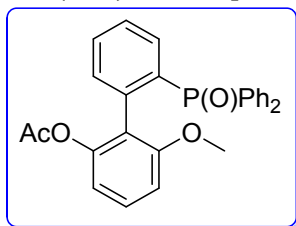

Yellow oil.  $^1\text{H}$  NMR (400 MHz,  $\text{CDCl}_3$ )  $\delta$ : 1.88 (s, 3 H), 3.37 (s, 3 H), 6.42 (d,  $J = 8.0$  Hz, 1 H), 6.53 (q,  $J_1 = 0.4$  Hz,  $J_2 = 8.0$  Hz), 7.12 (t,  $J = 8.0$  Hz), 7.17-7.20 (m, 1 H), 7.27-7.35 (m, 4 H), 7.38-7.43 (m, 2 H), 7.49-7.55 (m, 4 H), 7.57-7.59 (m, 1 H), 7.63-7.66 (m, 1 H);  $^{13}\text{C}$  NMR (100 MHz,  $\text{CDCl}_3$ )  $\delta$ : 20.65, 55.07, 107.48, 114.22, 122.30, 122.33, 127.11, 127.23, 127.75, 127.84, 127.87, 127.96, 129.30, 131.10, 131.13, 131.21, 131.24, 131.45, 131.47, 131.53, 131.81, 131.91, 131.97, 132.04, 132.13, 132.22, 132.55, 132.72, 132.88, 133.76, 133.83, 133.91, 133.94, 138.12, 138.20, 149.08, 157.52, 169.43;  $^{31}\text{P}$  NMR (162 MHz,  $\text{CDCl}_3$ )  $\delta$ : 27.84; **MS (ESI)**: found  $[\text{M}+\text{H}]^+$  443.14.

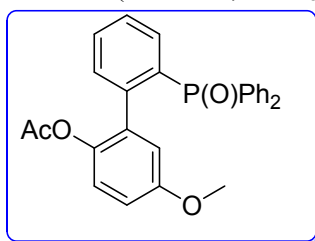

Yellow oil.  $^1\text{H}$  NMR (400 MHz,  $\text{CDCl}_3$ )  $\delta$ : 1.98 (s, 3 H), 3.71 (s, 3 H), 6.56-6.65 (m, 2 H), 6.92 (d,  $J = 4.0$  Hz, 1 H), 7.24-7.29 (m, 3 H), 7.33-7.43 (m, 4 H), 7.46-7.54 (m, 5 H), 7.67-7.72 (m, 2 H);  $^{13}\text{C}$  NMR (100 MHz,  $\text{CDCl}_3$ )  $\delta$ : 20.73, 55.57, 115.82, 116.38, 122.69, 127.26, 127.39, 127.88, 128.00, 128.23, 128.35, 131.06, 131.16, 131.31, 131.40, 131.46, 131.56, 131.94, 132.03, 132.35, 132.57, 132.87, 132.91, 133.01, 133.38, 134.07, 134.18, 141.04, 142.00, 142.08, 155.98, 170.07;  $^{31}\text{P}$  NMR (162 MHz,  $\text{CDCl}_3$ )  $\delta$ : 27.79; **MS (ESI)**: found  $[\text{M}+\text{H}]^+$  443.14.

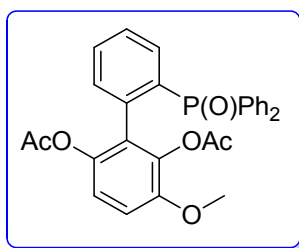

Yellow oil.  $^1\text{H}$  NMR (400 MHz,  $\text{CDCl}_3$ )  $\delta$ : 1.98 (s, 3 H), 1.90 (s, 3 H),  $\delta$ : 1.98 (s, 3 H), 3.72 (s, 3 H), 7.15-7.18 (m, 1 H), 7.28-7.44 (m, 7 H), 7.46-7.62 (m, 5 H), 7.64-7.70 (m, 1 H);  $^{13}\text{C}$  NMR (100 MHz,  $\text{CDCl}_3$ )  $\delta$ : 20.14, 20.54, 56.03, 111.71, 119.44, 127.66, 127.78, 127.81, 127.94, 128.06, 128.14, 128.18, 131.26, 131.29, 131.33, 131.74, 131.83, 131.93, 132.03, 132.13, 132.33, 132.69, 132.81, 133.66, 133.73, 133.77, 133.85, 136.53, 136.60, 137.64, 141.97, 148.71, 168.21, 169.13;  $^{31}\text{P}$  NMR (162 MHz,  $\text{CDCl}_3$ )  $\delta$ : 27.58; **MS (ESI)**: found  $[\text{M}+\text{H}]^+$  501.14.

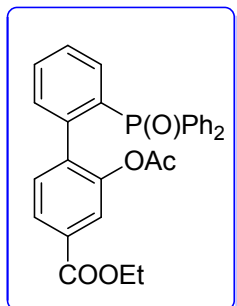

Yellow oil.  $^1\text{H}$  NMR (400 MHz,  $\text{CDCl}_3$ )  $\delta$ : 1.36-1.39 (t,  $J = 8.0$  Hz, 3 H), 1.95 (s, 3 H), 4.32-4.38 (m, 2 H), 7.20-

7.23 (m, 1 H), 7.27-7.33 (m, 3 H), 7.37-7.42 (m, 5 H), 7.45-7.55 (m, 5 H), 7.60-7.65 (m, 2 H), 7.69-7.72 (m, 1 H);  $^{13}\text{C}$  NMR (100 MHz,  $\text{CDCl}_3$ )  $\delta$ : 14.27, 20.56, 61.05, 123.05, 125.84, 127.50, 127.62, 127.95, 128.07, 128.23, 128.35, 131.11, 131.22, 131.35, 131.45, 131.57, 131.89, 131.99, 132.26, 132.58, 132.92, 133.27, 133.71, 133.82, 137.31, 137.35, 141.18, 141.26, 147.64, 165.43, 169.32;  $^{31}\text{P}$  NMR (162 MHz,  $\text{CDCl}_3$ )  $\delta$ : 27.36; **MS (ESI)**: found  $[\text{M}+\text{H}]^+485.15$ .

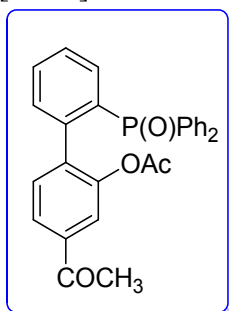

Yellow oil.  $^1\text{H}$  NMR (400 MHz,  $\text{CDCl}_3$ )  $\delta$ : 1.97 (s, 3 H), 2.55 (s, 3 H), 7.21-7.24 (q,  $J = 4.0$  Hz, 1 H), 7.27-7.32 (m, 3 H), 7.38-7.43 (m, 5 H), 7.47-7.57 (m, 5 H), 7.62-7.68 (m, 3 H);  $^{13}\text{C}$  NMR (100 MHz,  $\text{CDCl}_3$ )  $\delta$ : 20.59, 26.60, 119.51, 121.63, 124.71, 127.57, 127.70, 127.95, 128.07, 128.21, 128.27, 128.39, 131.02, 131.12, 131.29, 131.34, 131.39, 131.52, 131.61, 131.63, 131.77, 131.90, 131.99, 132.10, 132.53, 132.65, 132.80, 133.14, 133.75, 133.86, 137.57, 137.63, 141.09, 141.16, 147.96, 169.36;  $^{31}\text{P}$  NMR (162 MHz,  $\text{CDCl}_3$ )  $\delta$ : 27.44; **MS (ESI)**: found  $[\text{M}+\text{H}]^+455.14$ .

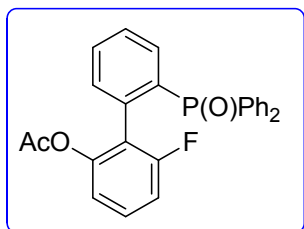

Yellow oil.  $^1\text{H}$  NMR (400 MHz,  $\text{CDCl}_3$ )  $\delta$ : 1.85 (s, 3 H), 6.69-6.74 (m, 2 H), 7.14-7.19 (m, 1 H), 7.24-7.26 (m, 1 H), 7.30-7.36 (m, 2 H), 7.36-7.49 (m, 5 H), 7.51-7.64 (m, 6 H);  $^{13}\text{C}$  NMR (100 MHz,  $\text{CDCl}_3$ )  $\delta$ : 20.54, 112.39, 112.61, 117.55, 117.58, 121.79, 122.03, 127.81, 127.93, 128.06, 128.08, 128.18, 128.20, 129.42, 129.51, 131.46, 131.48, 131.50, 131.53, 131.56, 131.59, 131.77, 131.87, 131.96, 132.06, 132.12, 132.24, 132.34, 133.04, 133.16, 133.69, 133.80, 135.45, 135.53, 149.23, 149.29, 158.383, 161.29, 169.06;  $^{31}\text{P}$  NMR (162 MHz,  $\text{CDCl}_3$ )  $\delta$ : 27.29;  $^{19}\text{F}$  NMR (376 MHz,  $\text{CDCl}_3$ )  $\delta$ : -108.9 (d,  $J = 5.2$  Hz, 1 F); **MS (ESI)**: found  $[\text{M}+\text{H}]^+431.12$ .

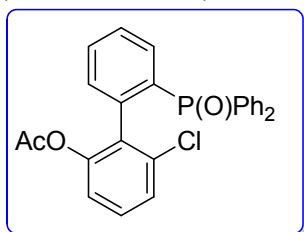

Yellow oil.  $^1\text{H}$  NMR (400 MHz,  $\text{CDCl}_3$ )  $\delta$ : 1.79 (s, 3 H), 6.87-6.89 (m, 1 H), 7.10-7.16 (m, 1 H), 7.18-7.21 (m, 1 H), 7.30-7.34 (m, 2 H), 7.36-7.42 (m, 4 H), 7.45-7.49 (m, 1 H), 7.51-7.59 (m, 4 H), 7.61-7.66 (m, 2 H);  $^{13}\text{C}$  NMR (100 MHz,  $\text{CDCl}_3$ )  $\delta$ : 20.48, 120.43, 126.53, 127.64, 127.76, 128.05, 128.07, 128.17, 128.19, 129.29, 131.06, 131.45, 131.49, 131.52, 131.55, 131.90, 132.00, 132.04, 132.13, 132.43, 132.64, 132.73, 132.76, 133.46, 133.65, 133.68, 133.76, 134.67, 139.10, 139.17, 149.32, 168.97;  $^{31}\text{P}$  NMR (162 MHz,  $\text{CDCl}_3$ )  $\delta$ : 27.33; **MS (ESI)**: found  $[\text{M}+\text{Na}]^+469.07$ .

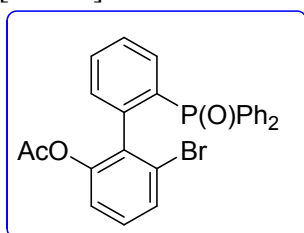

Yellow oil.  $^1\text{H}$  NMR (400 MHz,  $\text{CDCl}_3$ )  $\delta$ : 1.77 (s, 3 H), 6.92-6.94 (m, 1 H), 7.08-7.12 (t,  $J = 8.0$  Hz, 1 H), 7.18-7.21 (q,  $J_1 = 4.0$  Hz,  $J_2 = 4.0$  Hz, 1 H), 7.31-7.35 (m, 3 H), 7.36-7.42 (m, 4 H), 7.44-7.50 (m, 2 H), 7.52-7.67 (m, 6 H);

$^{13}\text{C}$  NMR (100 MHz,  $\text{CDCl}_3$ )  $\delta$ : 20.45, 121.03, 124.84, 127.61, 127.73, 128.06, 128.19, 129.65, 129.68, 130.72, 131.48, 131.50, 131.73, 131.99, 132.05, 132.09, 132.15, 132.23, 132.51, 132.78, 133.55, 133.60, 133.72, 133.81, 134.61, 134.64, 140.94, 141.01, 149.12, 168.94;  $^{31}\text{P}$  NMR (162 MHz,  $\text{CDCl}_3$ )  $\delta$ : 27.35; **MS (ESI)**: found  $[\text{M}+\text{H}]^+493.03$ .

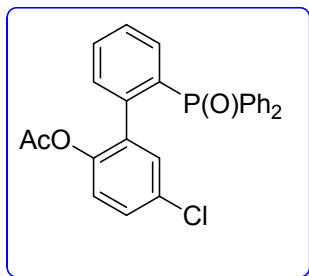

Yellow oil.  $^1\text{H}$  NMR (400 MHz,  $\text{CDCl}_3$ )  $\delta$ : 1.95 (s, 3 H), 6.73-6.75 (d,  $J = 8.0$  Hz, 1 H), 7.08-7.12 (m, 2 H), 7.19-7.22 (m, 1 H), 7.31-7.34 (m, 1 H), 7.35-7.43 (m, 4 H), 7.44-7.54 (m, 4 H), 7.56-7.64 (m, 4 H);  $^{13}\text{C}$  NMR (100 MHz,  $\text{CDCl}_3$ )  $\delta$ : 20.62, 123.01, 127.51, 127.63, 127.76, 127.88, 128.04, 128.14, 128.21, 128.34, 128.79, 129.76, 130.05, 130.93, 131.03, 131.30, 131.36, 131.39, 131.45, 131.56, 131.59, 131.72, 131.81, 131.88, 131.92, 132.01, 132.22, 132.80, 132.96, 133.26, 133.62, 133.73, 133.97, 134.01, 140.57, 140.65, 146.44, 169.31;  $^{31}\text{P}$  NMR (162 MHz,  $\text{CDCl}_3$ )  $\delta$ : 27.24; **MS (ESI)**: found  $[\text{M}+\text{H}]^+447.09$ .

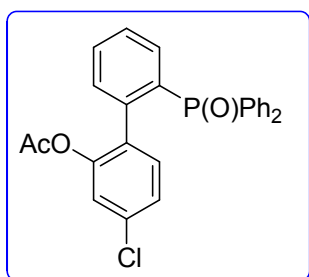

Yellow oil.  $^1\text{H}$  NMR (400 MHz,  $\text{CDCl}_3$ )  $\delta$ : 1.95 (s, 3 H), 6.72 (d,  $J = 4.0$  Hz, 1 H), 6.99-7.02 (m, 1 H), 7.19-7.24 (m, 2 H), 7.29-7.33 (m, 2 H), 7.38-7.45 (m, 4 H), 7.49-7.54 (m, 5 H), 7.63-7.68 (m, 2 H);  $^{13}\text{C}$  NMR (100 MHz,  $\text{CDCl}_3$ )  $\delta$ : 20.64, 122.27, 125.04, 127.47, 127.59, 127.95, 128.07, 128.27, 128.39, 131.09, 131.13, 131.23, 131.32, 131.45, 131.55, 131.58, 131.92, 131.97, 132.02, 132.14, 132.95, 132.98, 133.12, 133.18, 133.81, 133.93, 134.07, 140.99, 141.07, 147.99, 169.08;  $^{31}\text{P}$  NMR (162 MHz,  $\text{CDCl}_3$ )  $\delta$ : 26.97; **MS (ESI)**: found  $[\text{M}+\text{H}]^+447.09$ .

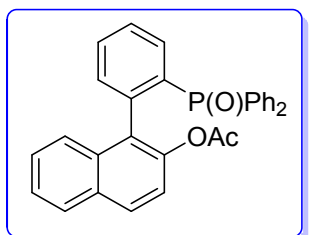

Yellow oil.  $^1\text{H}$  NMR (400 MHz,  $\text{CDCl}_3$ )  $\delta$ : 1.97 (s, 3 H), 7.01-7.03 (d,  $J=8.0$  Hz, 1 H), 7.08-7.16 (m, 5 H), 7.18-7.28 (m, 4 H), 7.29-7.33 (m, 1 H), 7.38-7.44 (m, 4 H), 7.52-7.55 (m, 1 H), 7.58-7.64 (m, 3 H), 7.83-7.89 (m, 1 H);  $^{13}\text{C}$  NMR (100 MHz,  $\text{CDCl}_3$ )  $\delta$ : 20.75, 120.93, 125.21, 126.09, 126.34, 127.45, 127.57, 127.60, 127.72, 127.79, 127.83, 128.59, 128.63, 129.62, 131.03, 131.06, 131.09, 131.18, 131.57, 131.59, 131.66, 131.69, 131.84, 132.34, 132.45, 132.53, 132.8, 133.30, 133.37, 133.54, 134.18, 134.28, 139.31, 139.39, 145.90, 169.50;  $^{31}\text{P}$  NMR (162 MHz,  $\text{CDCl}_3$ )  $\delta$ : 27.45; **MS (ESI)**: found  $[\text{M}+\text{H}]^+463.14$ .

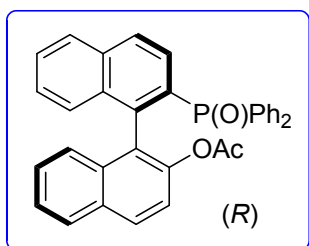

Yellow oil.  $^1\text{H}$  NMR (400 MHz,  $\text{CDCl}_3$ )  $\delta$ : 1.95 (s, 3 H), 6.91 (d,  $J = 4.0$  Hz, 1 H), 7.08-7.17 (m, 6 H), 7.19-7.32 (m,

5 H), 7.39-7.46 (m, 4 H), 7.50-7.54 (t,  $J = 4.0$  Hz, 1 H), 7.84-7.91 (m, 2 H), 7.98- 8.00 (m, 1 H);  $^{13}\text{C}$  NMR (100 MHz,  $\text{CDCl}_3$ )  $\delta$ : 20.75, 121.31, 125.23, 125.51, 125.55, 126.27, 127.01, 127.30, 127.41, 127.53, 127.61, 127.73, 127.98, 128.10, 128.19, 128.71, 128.82, 129.44, 129.80, 130.45, 130.89, 130.89, 130.96, 131.00, 131.51, 131.55, 131.60, 131.64, 132.10, 132.45, 132.66, 132.77, 133.14, 133.48, 133.66, 134.48, 138.68, 138.76, 146.93;  $^{31}\text{P}$  NMR (162 MHz,  $\text{CDCl}_3$ )  $\delta$ : 28.44; **MS (ESI)**: found  $[\text{M}+\text{H}]^+ 513.16$ ;  $[\alpha]^{22}_{\text{D}} = +4^\circ$  ( $c = 1.0$ ,  $\text{CHCl}_3$ ). Enantiomeric excess is 99% determined by HPLC (Chiralcel AD-H, Hexane/Isopropanol 90/10, flow rate = 1.0 mL/min, 230 nm): major isomer:  $t_{\text{R}} = 54.90$  min.

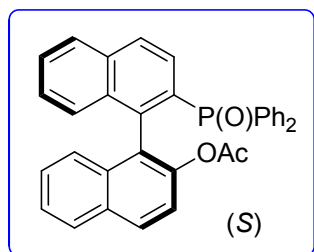

Yellow oil.  $^1\text{H}$  NMR (400 MHz,  $\text{CDCl}_3$ )  $\delta$ : 1.78 (s, 3 H), 6.90-6.93 (d,  $J = 12.0$  Hz, 1 H), 7.09-7.25 (m, 9 H), 7.27-7.33 (m, 2 H), 7.39-7.45 (m, 4 H), 7.52-7.56 (t,  $J = 8.0$  Hz, 1 H), 7.66-7.71 (m, 2 H), 7.87-7.93 (m, 2 H), 8.00-8.02 (m, 2 H);  $^{13}\text{C}$  NMR (100 MHz,  $\text{CDCl}_3$ )  $\delta$ : 20.76, 121.32, 125.24, 125.51, 126.28, 127.01, 127.30, 127.41, 127.53, 127.62, 127.73, 127.99, 128.11, 128.20, 128.71, 128.82, 129.81, 130.45, 130.89, 130.94, 130.97, 131.51, 131.55, 131.61, 131.65, 132.10, 132.45, 132.66, 133.14, 133.48, 133.66, 134.48, 138.68, 138.76, 146.93, 168.86;  $^{31}\text{P}$  NMR (162 MHz,  $\text{CDCl}_3$ )  $\delta$ : 28.45; **MS (ESI)**: found  $[\text{M}+\text{H}]^+ 513.16$ .  $[\alpha]^{22}_{\text{D}} = -6^\circ$  ( $c = 1.0$ ,  $\text{CHCl}_3$ ). Enantiomeric excess is 99% determined by HPLC (Chiralcel AD-H, Hexane/Isopropanol 90/10, flow rate = 1.0 mL/min, 230 nm): major isomer:  $t_{\text{R}} = 38.72$  min.

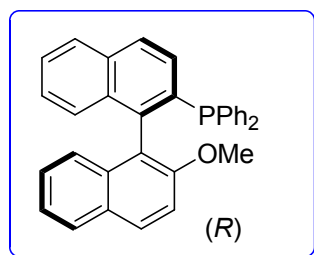

White powder.  $^1\text{H}$  NMR (400 MHz,  $\text{CDCl}_3$ )  $\delta$ : 3.32-3.33 (d, 3 H), 6.94 (d,  $J = 8.0$  Hz, 1 H), 7.04-7.19 (m, 7 H), 7.20 (s, 1 H), 7.23-7.28 (m, 9 H), 7.37-7.45 (m, 2 H), 7.84-7.85 (d, 3 H), 7.96-7.99 (d,  $J = 12.0$  Hz, 1 H);  $^{13}\text{C}$  NMR (100 MHz,  $\text{CDCl}_3$ )  $\delta$ : 55.44, 112.57, 121.71, 121.80, 123.34, 125.24, 126.32, 126.40, 126.66, 126.70, 126.73, 127.79, 127.89, 127.95, 128.00, 128.06, 128.07, 128.13, 128.57, 129.85, 130.46, 132.98, 133.05, 133.16, 133.36, 133.45, 133.64, 133.68, 134.05, 135.37, 135.46, 137.58, 137.71, 138.38, 138.52, 142.11, 142.46, 155.03, 155.05;  $^{31}\text{P}$  NMR (162 MHz,  $\text{CDCl}_3$ )  $\delta$ : -13.95; **MS (ESI)**: found  $[\text{M}+\text{H}]^+ 469.16$ . Enantiomeric excess is 99% determined by HPLC (Chiralcel AD-H, Hexane/Isopropanol 99/1, flow rate = 1.0 mL/min, 254 nm): major isomer:  $t_{\text{R}} = 5.23$  min.

## VI. References:

1. a) T. H. Jepsen, M. Larsen, M. Jørgensen, K. A. Solanko, A. D. Bond, A. Kadziola, M. B. Nielsen, *Eur. J. Org. Chem.* **2011**, 53–57; b) A. Port, A. Virgili, A. Alvarez-Larena, J. F. Piniella, *Tetrahedron: Asymmetry*, **2000**, *11*, 3747–3757; c) B. E. Mann, B. L. Shaw, R. M. Slade, *J. Chem. Soc. (A)*, **1971**, 2976–2980; d) R. Schmid, J. Foricher, M. Cereghetti, *Helv. Chim. Acta.*, **1991**, *74*, 370–389.
2. C. Baillie, J.-L. Xiao, *Tetrahedron*, **2004**, *60*, 4159–4168.
3. M. Shi, L.-H. Chen, C.-Q. Li, *J. Am. Chem. Soc.* **2005**, *127*, 3790;
4. N. Obara, I. Yoshida, K. Tanaka, T. Kan, T. Morimoto, *Tetrahedron Letters* **2007**, *48*, 3093–3095.

## VII. NMR Charts

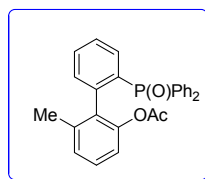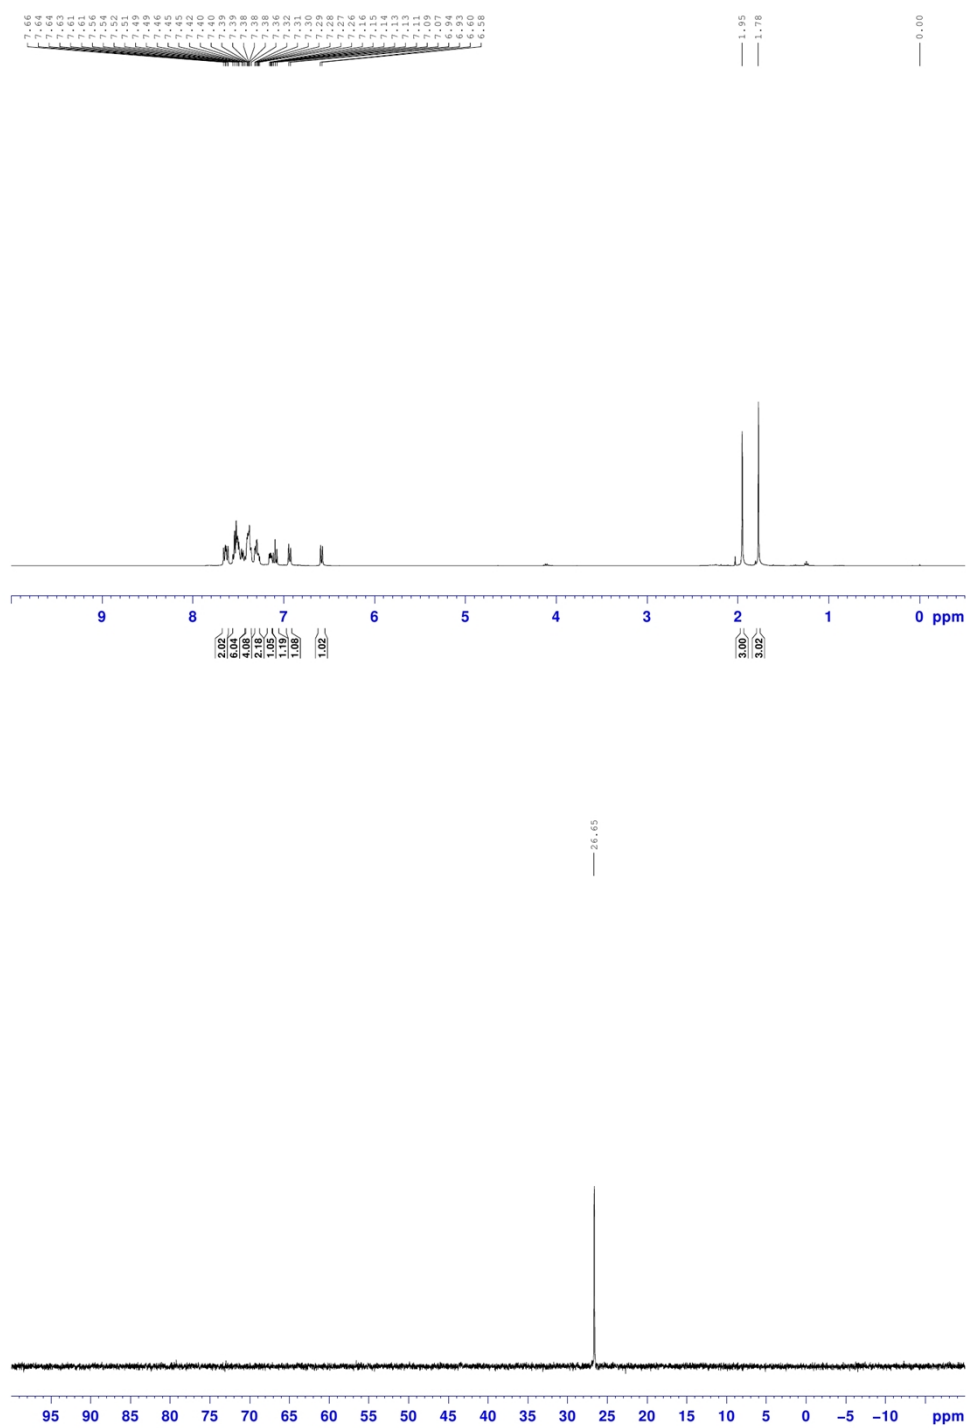

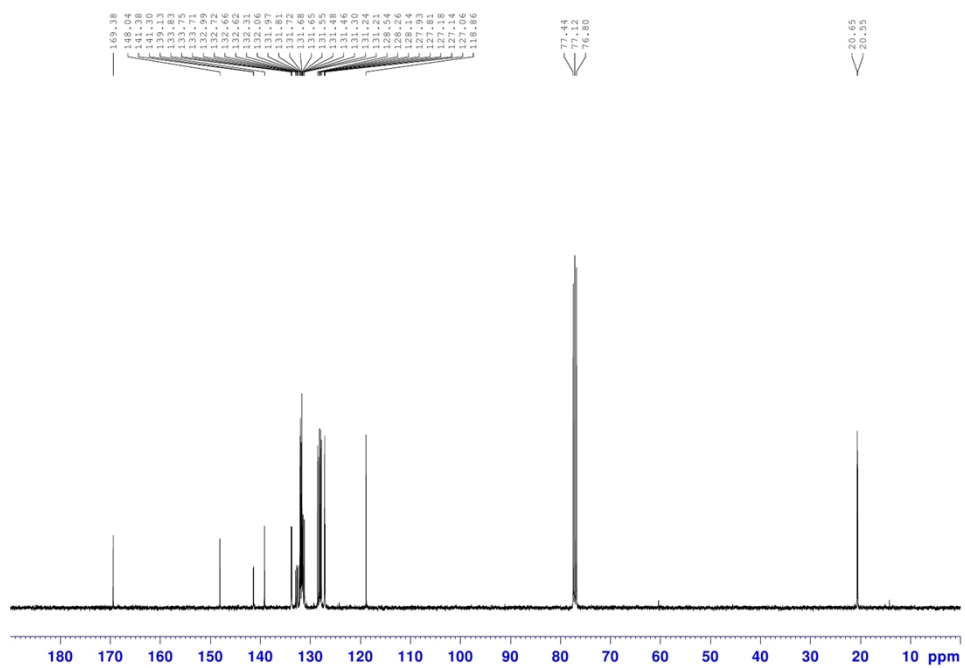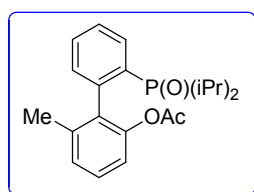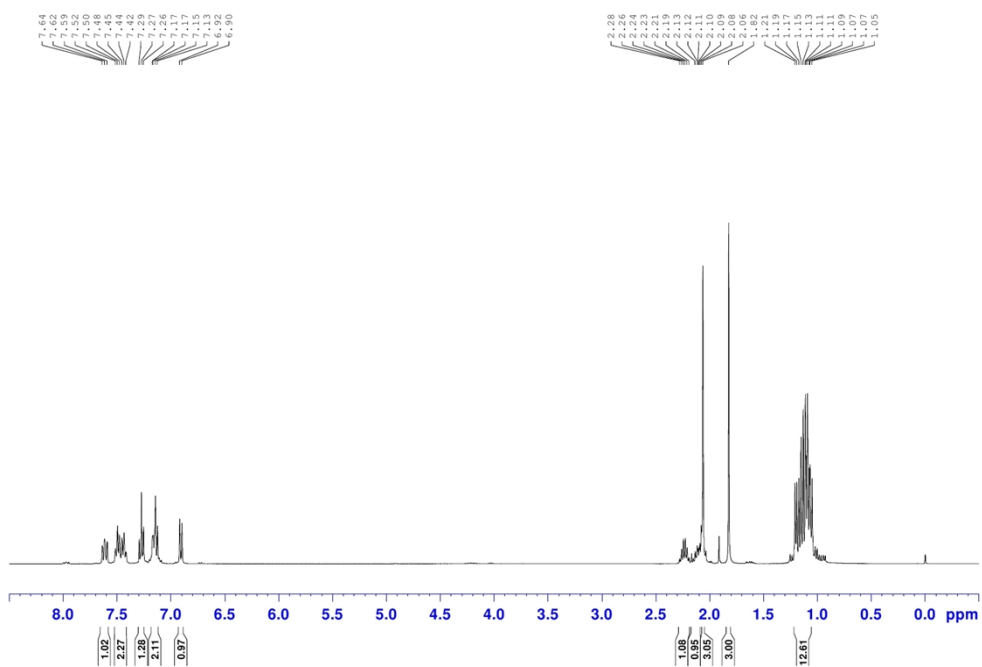

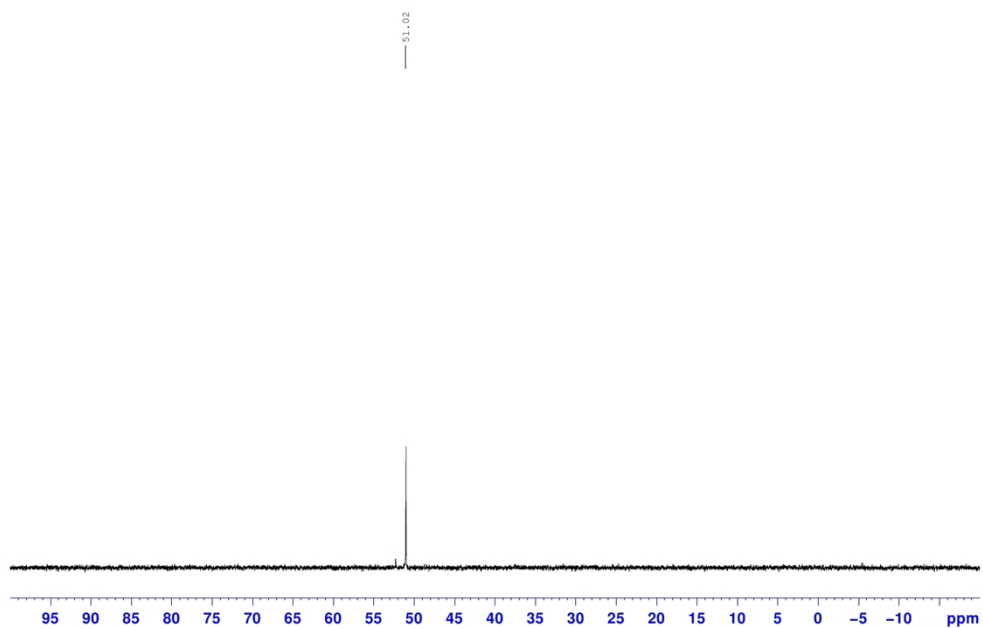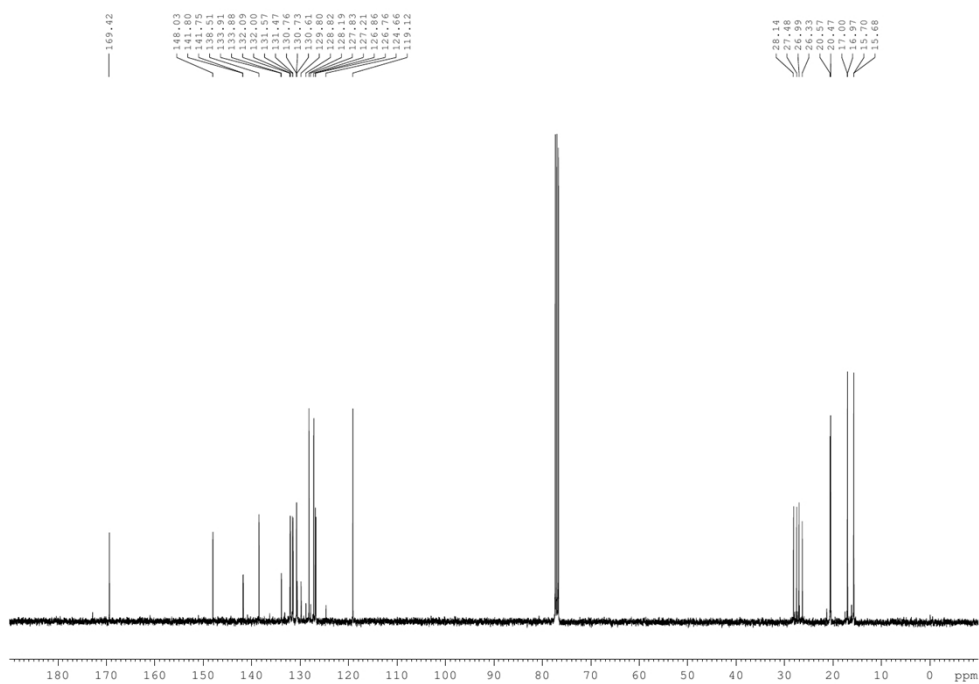

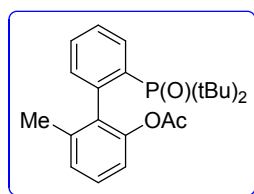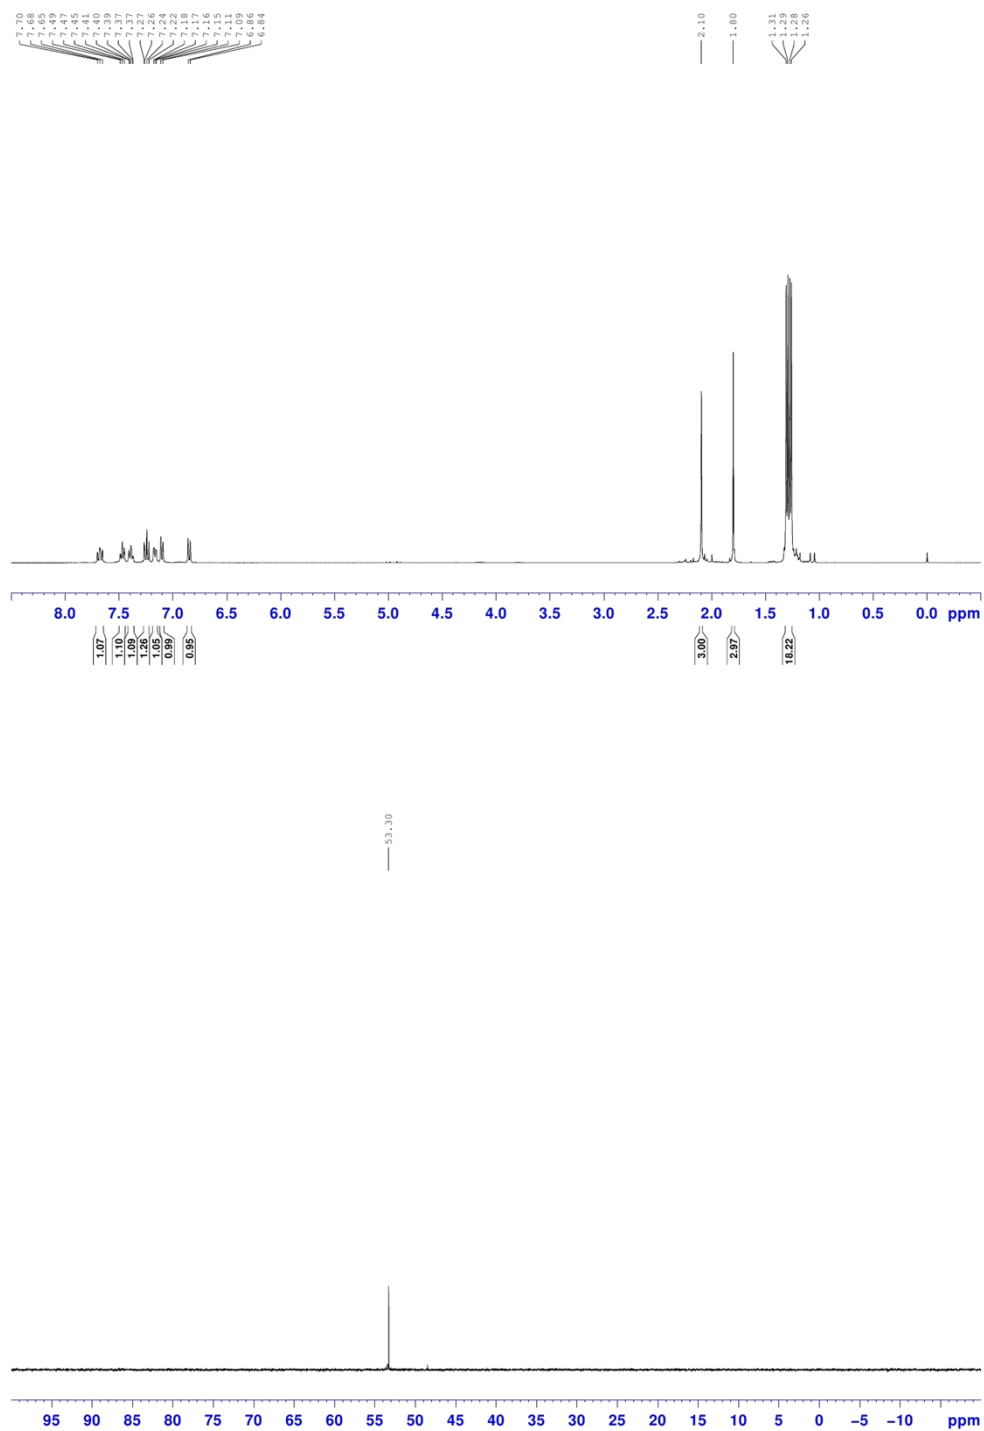

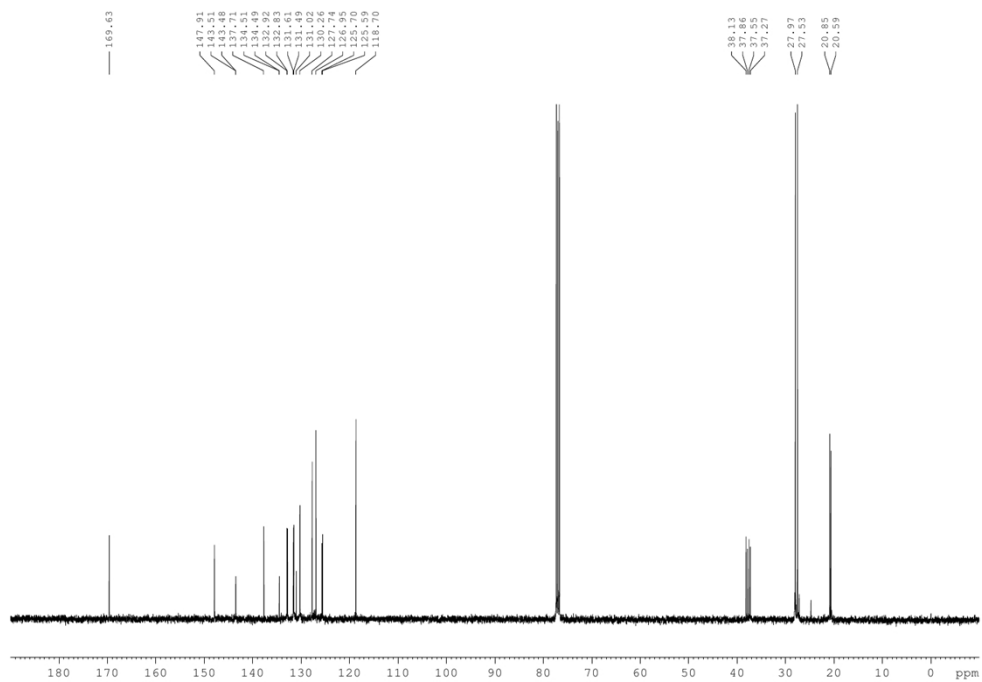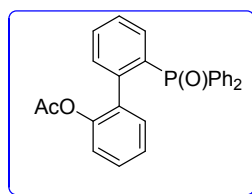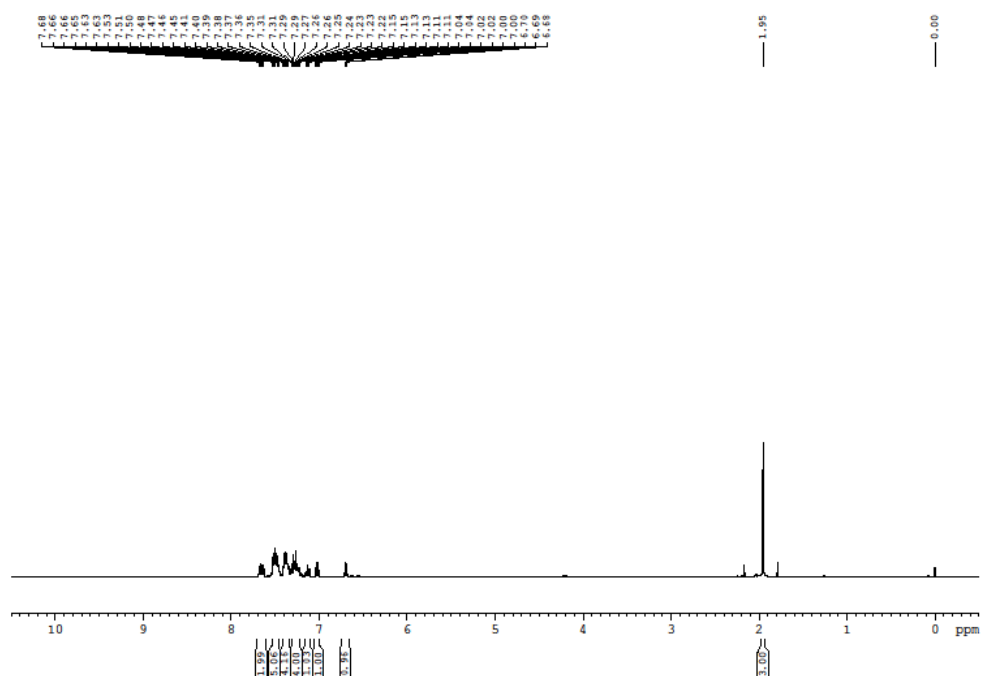

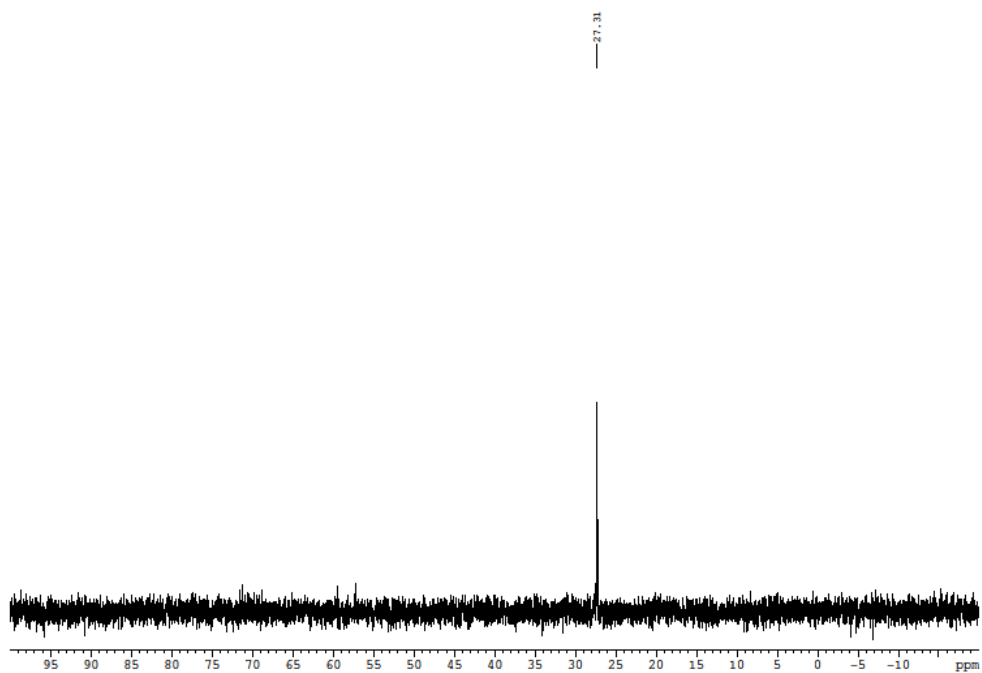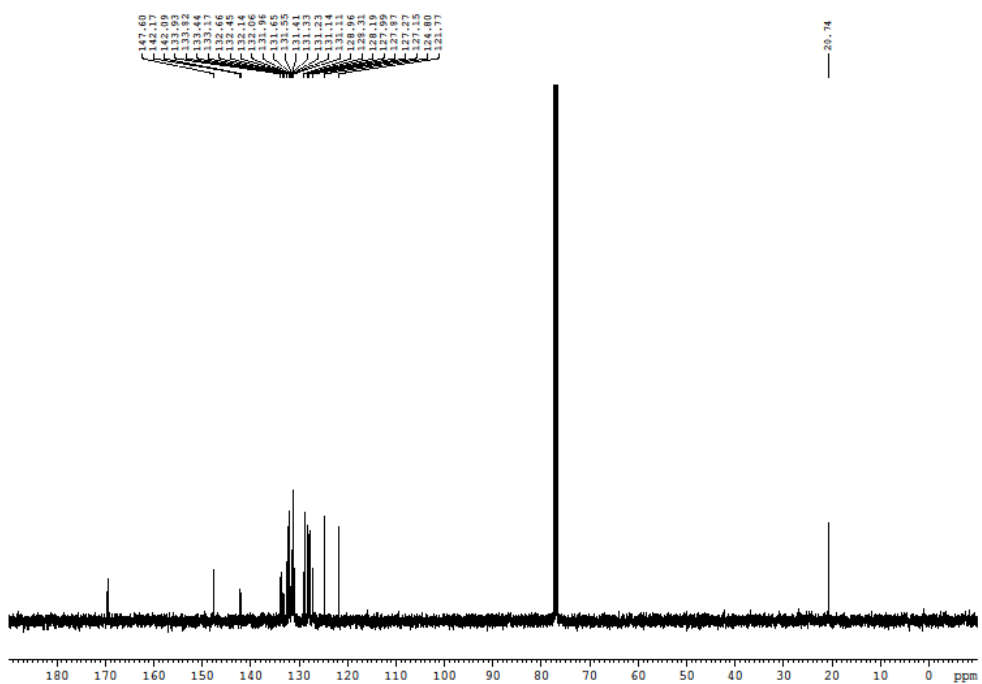

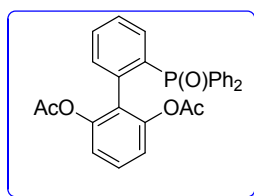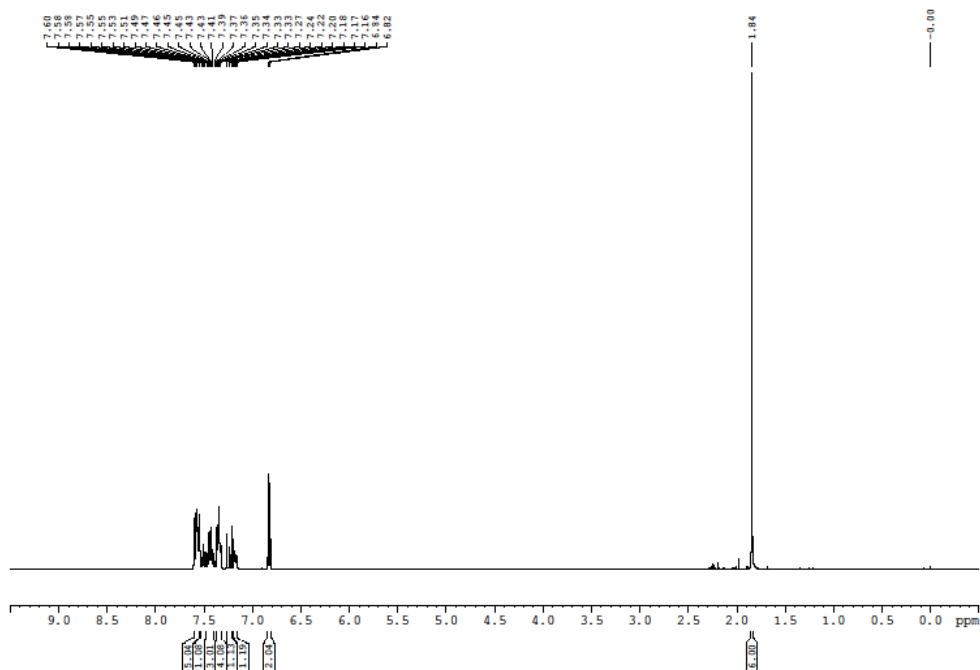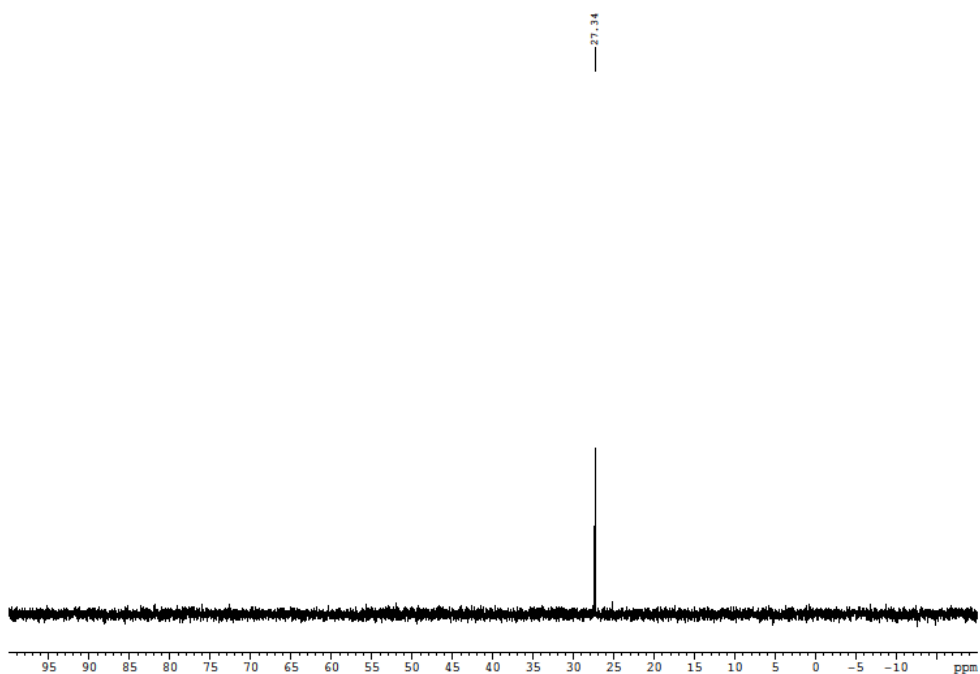

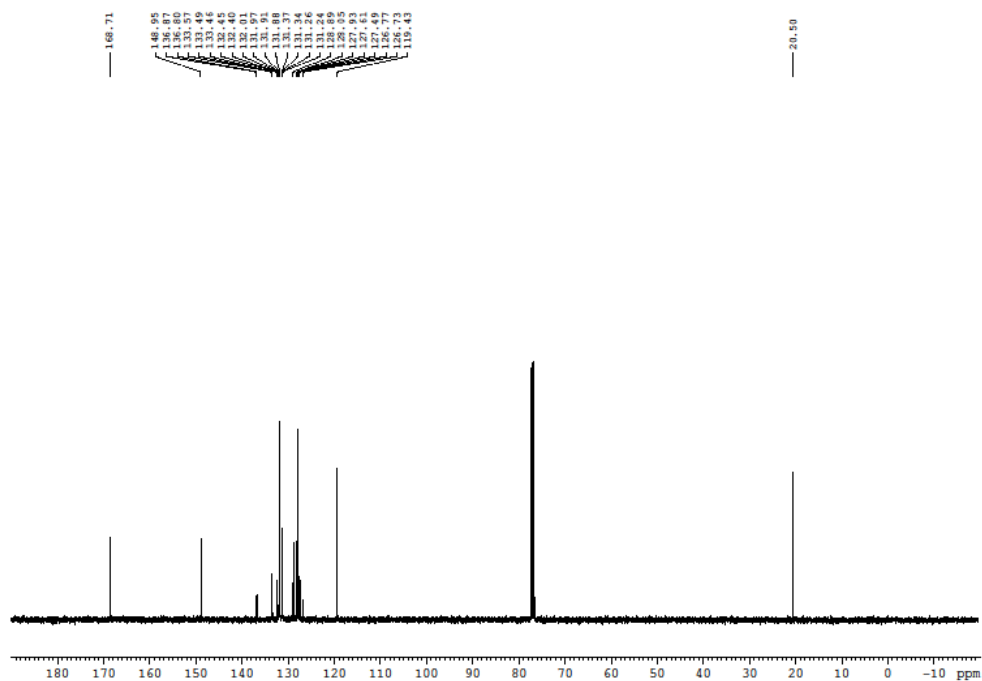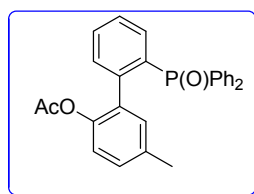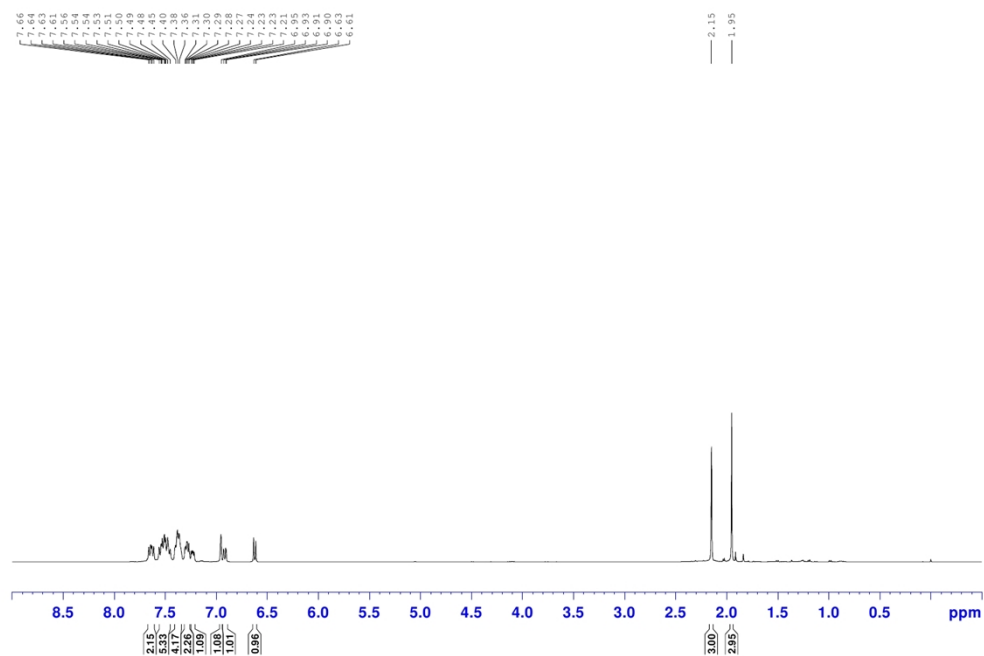

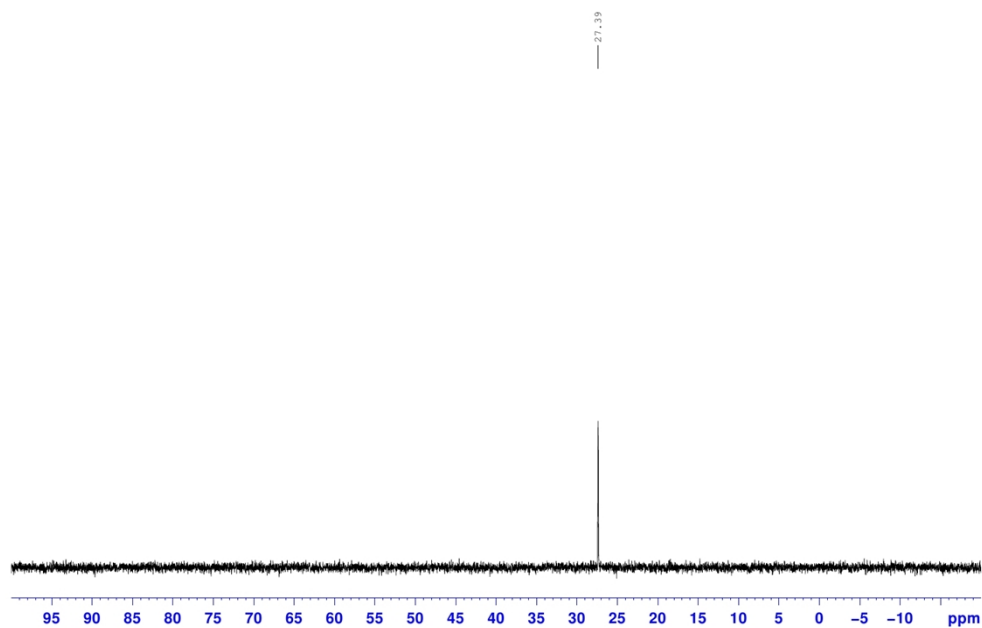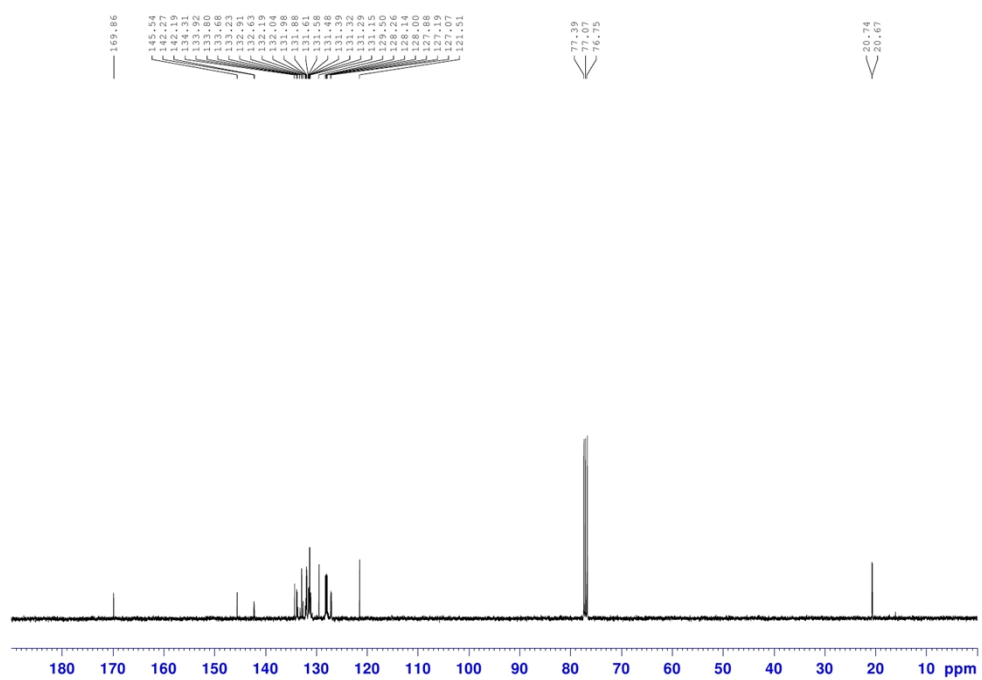

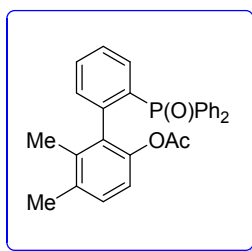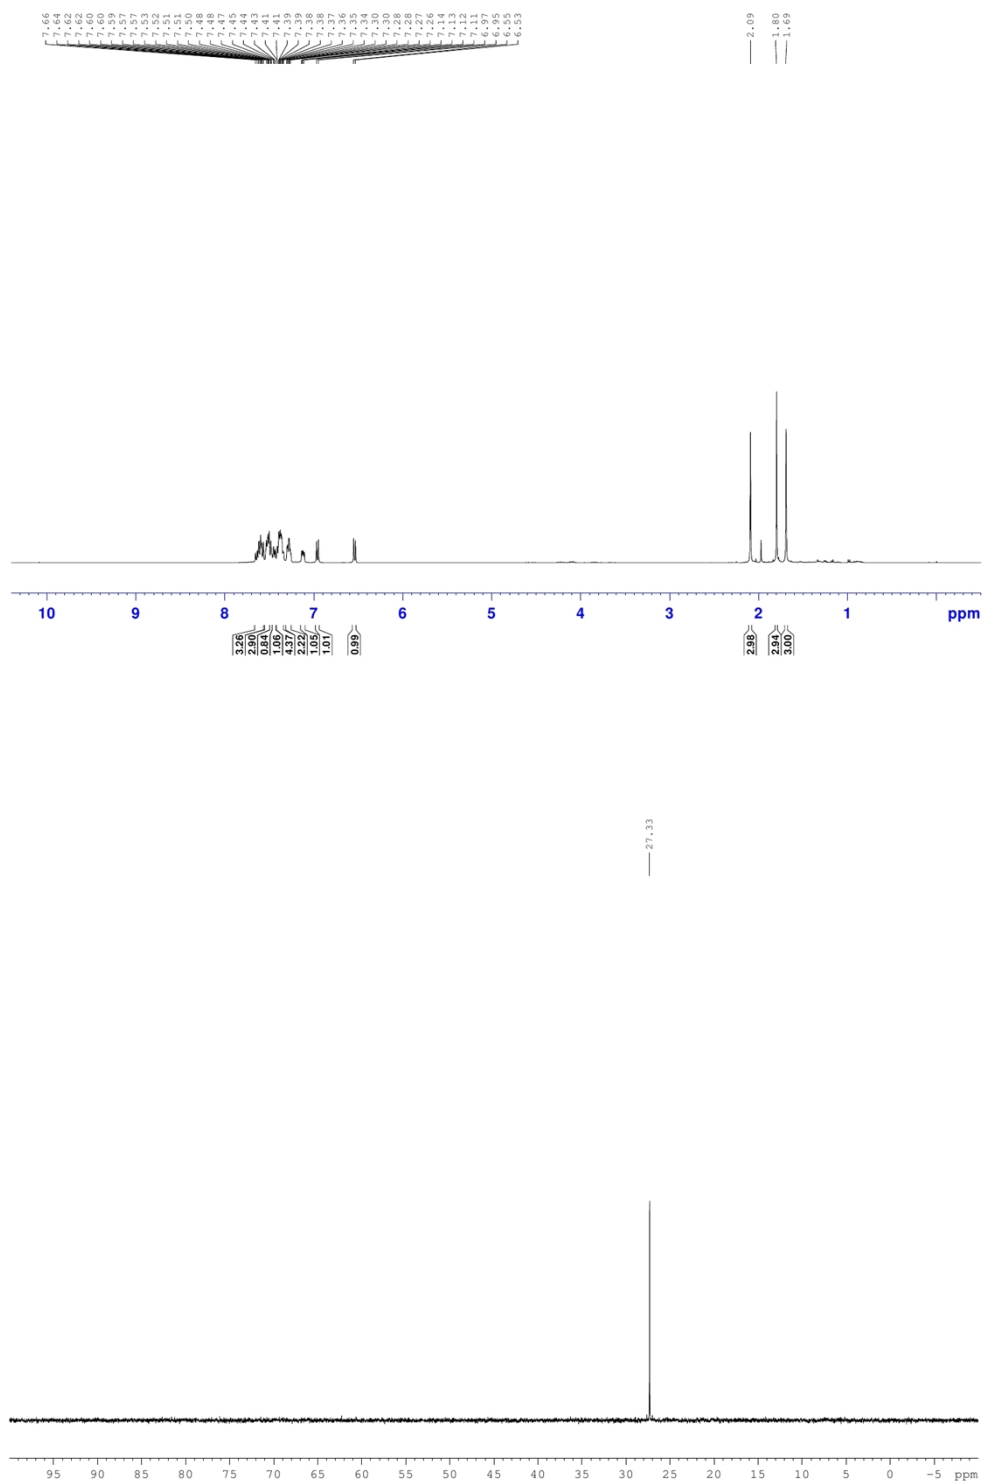

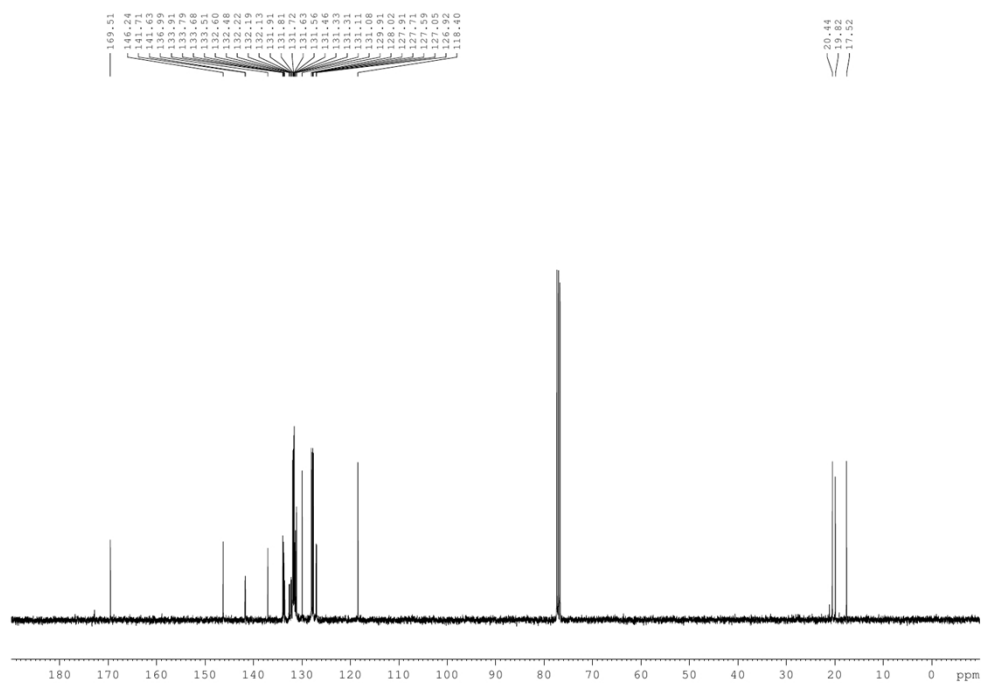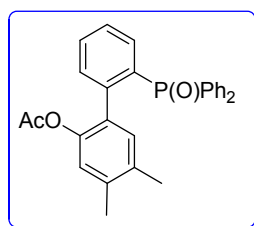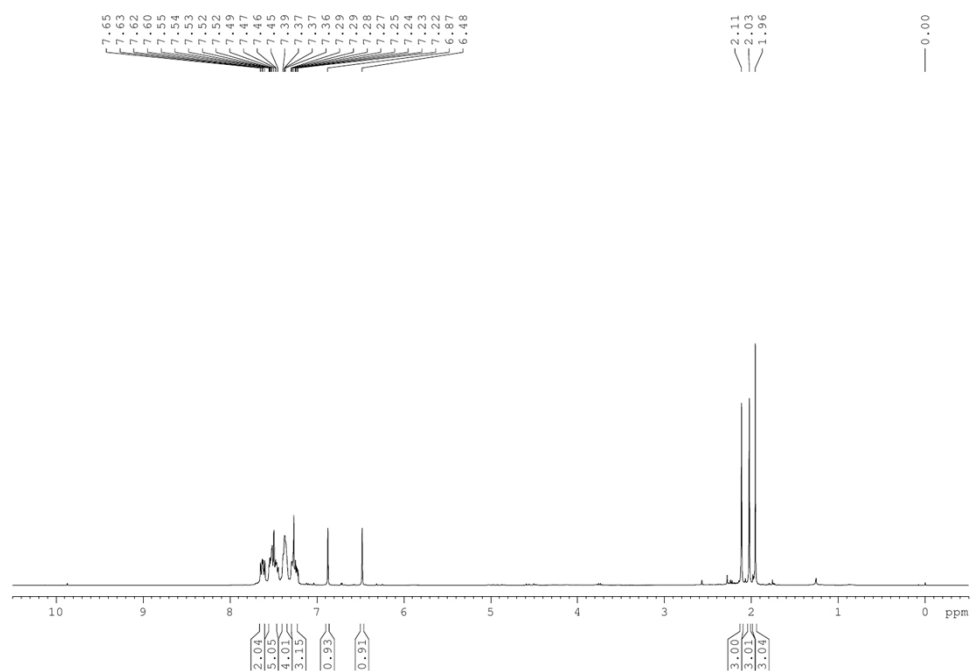

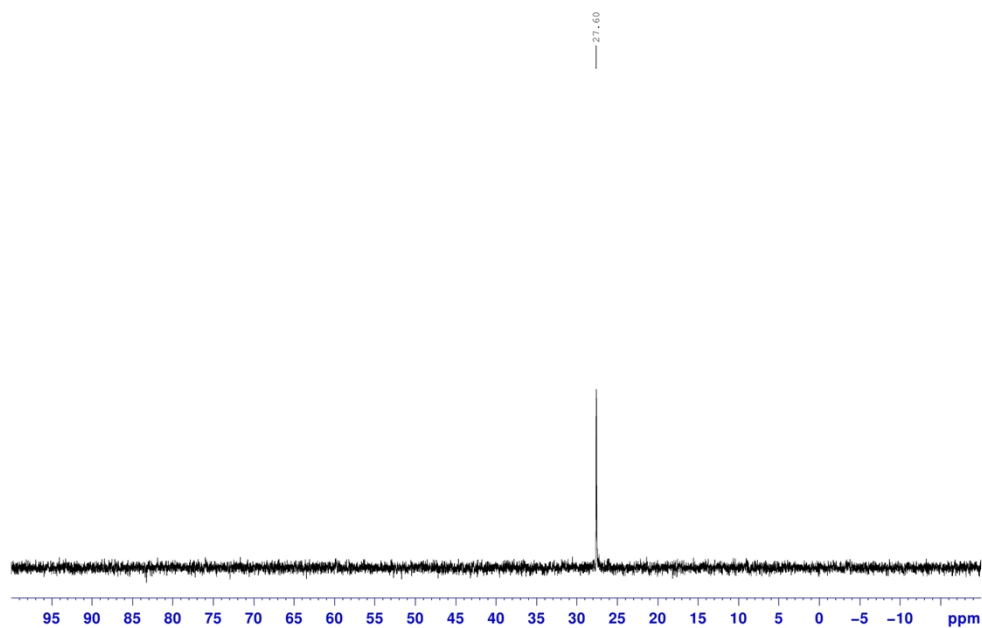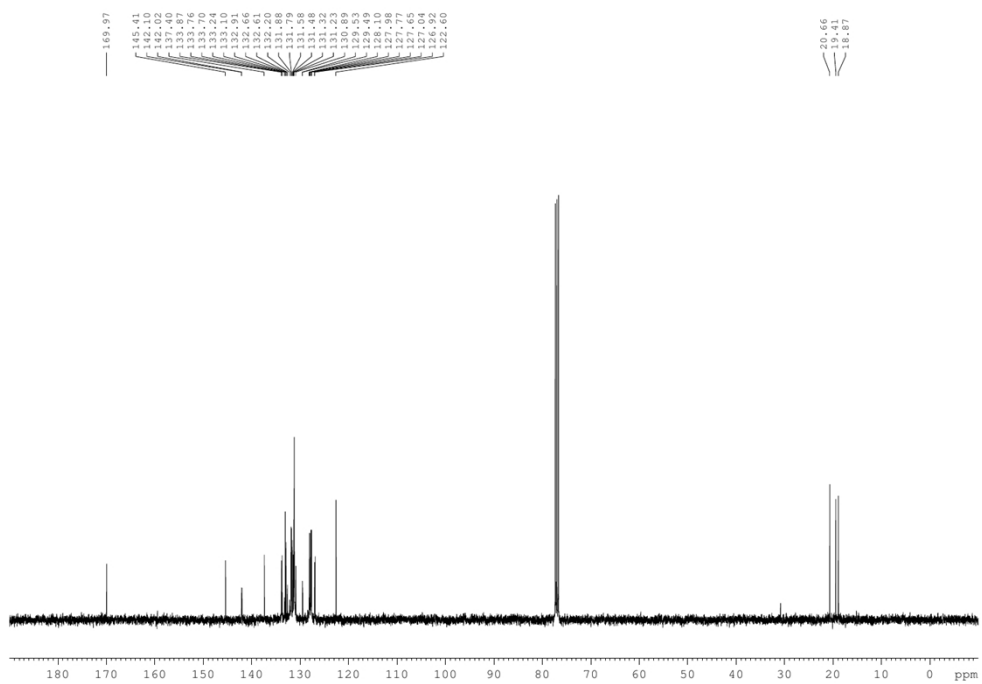

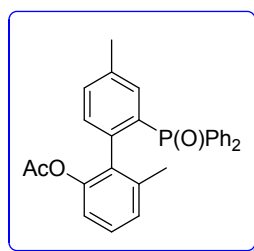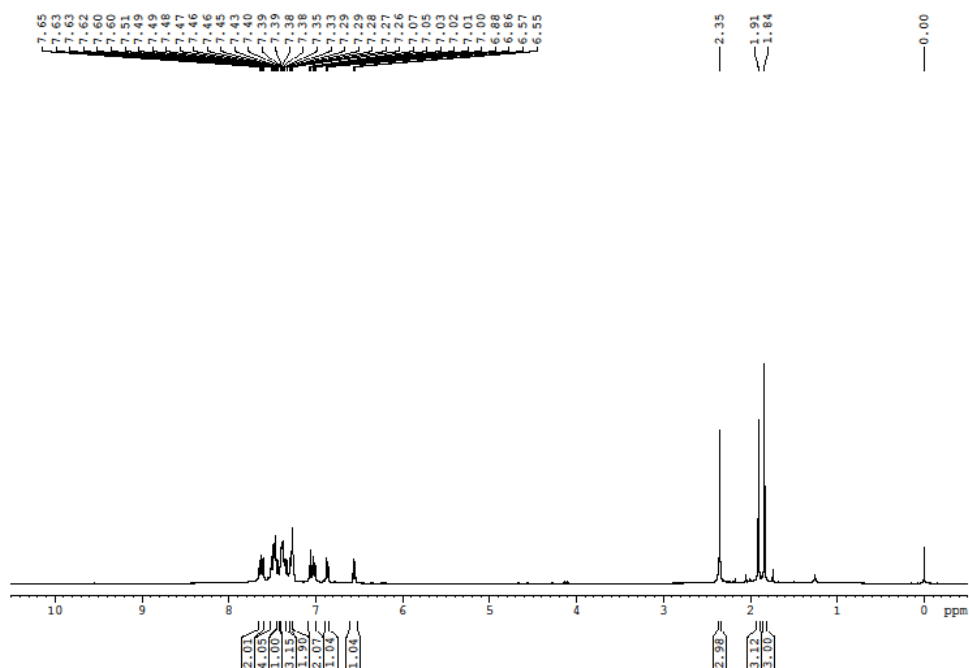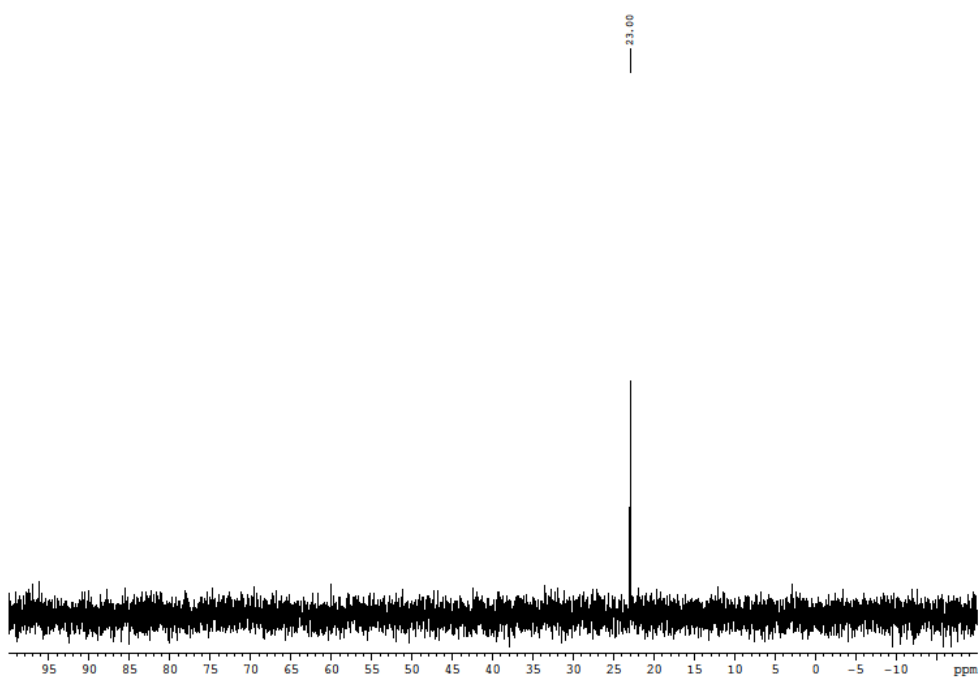

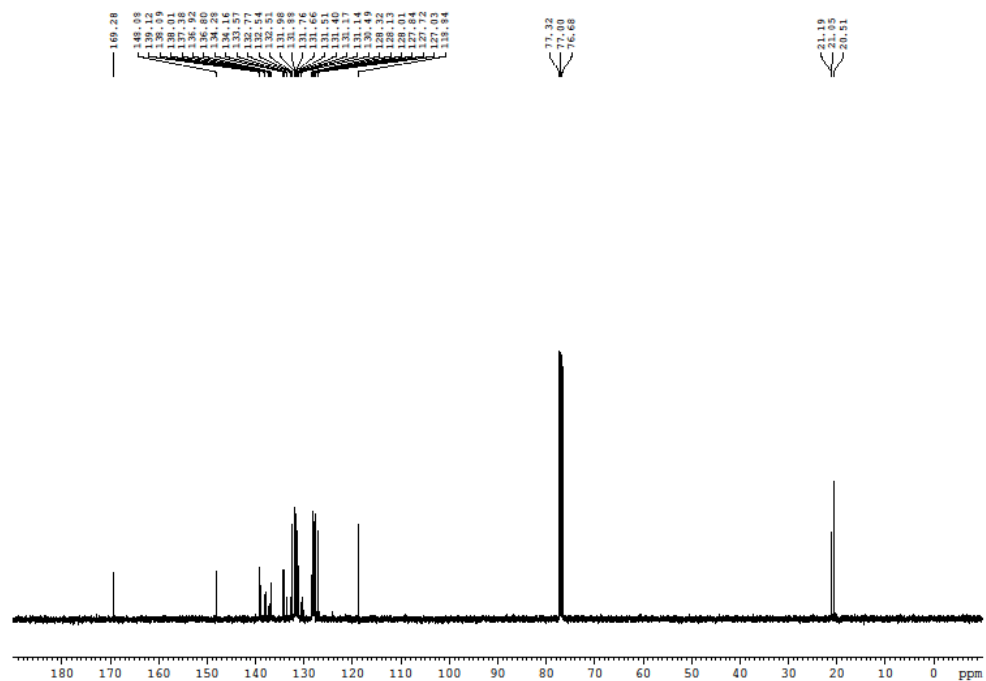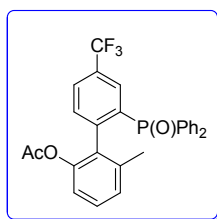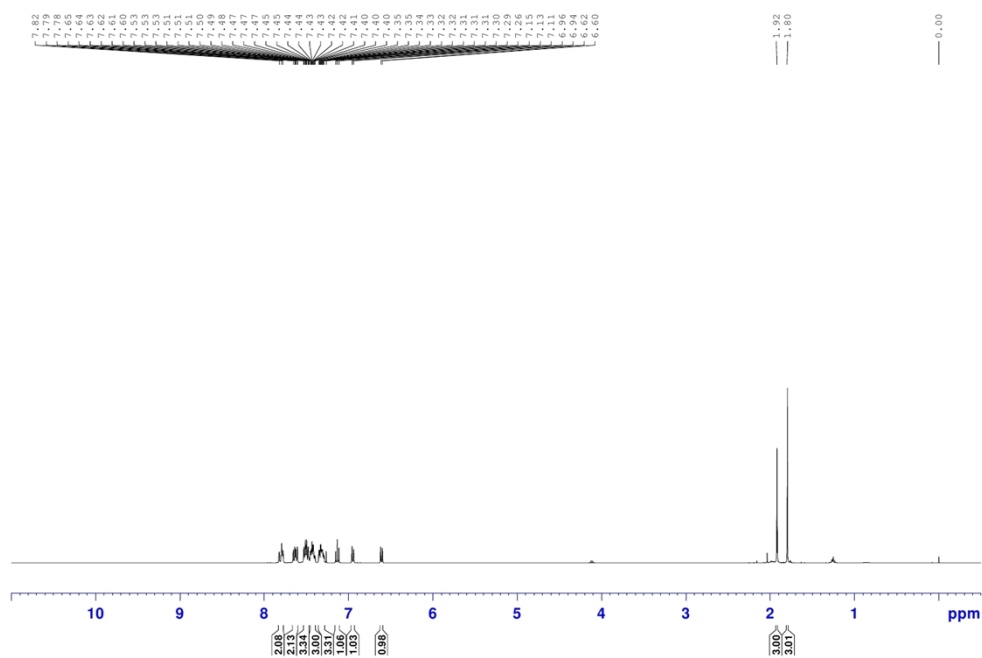

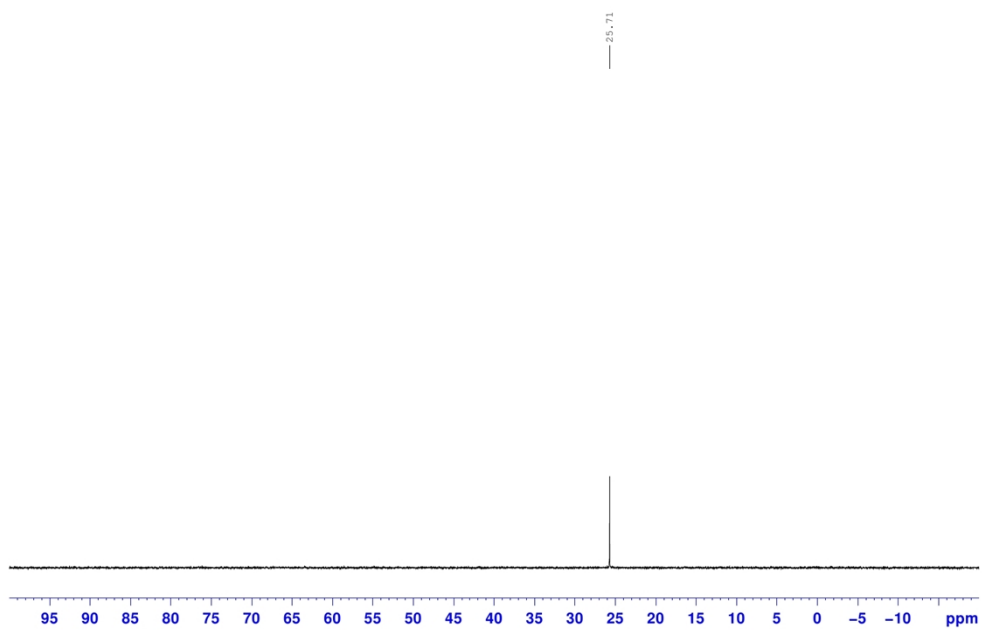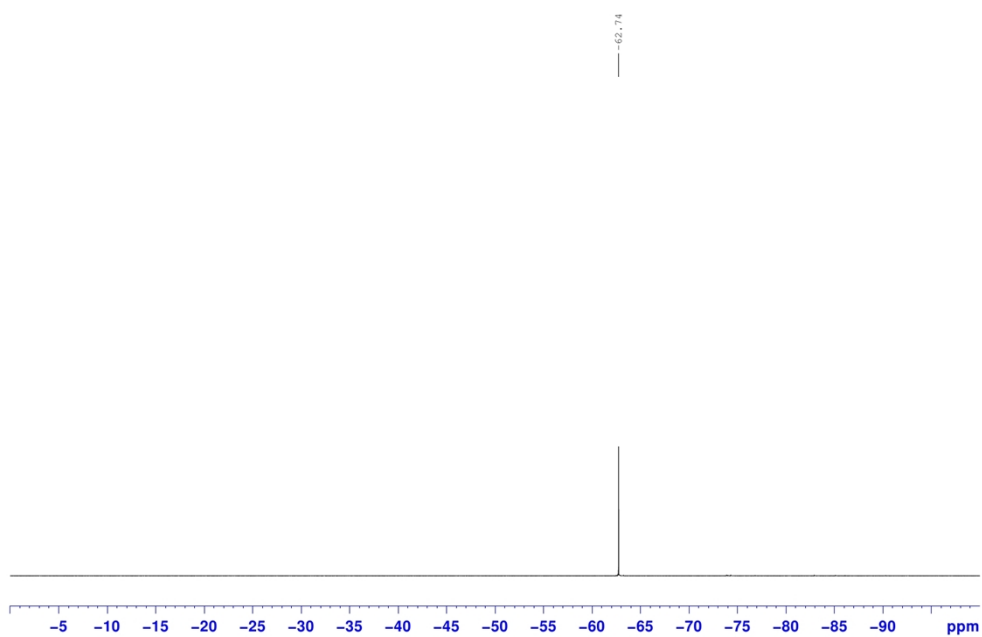

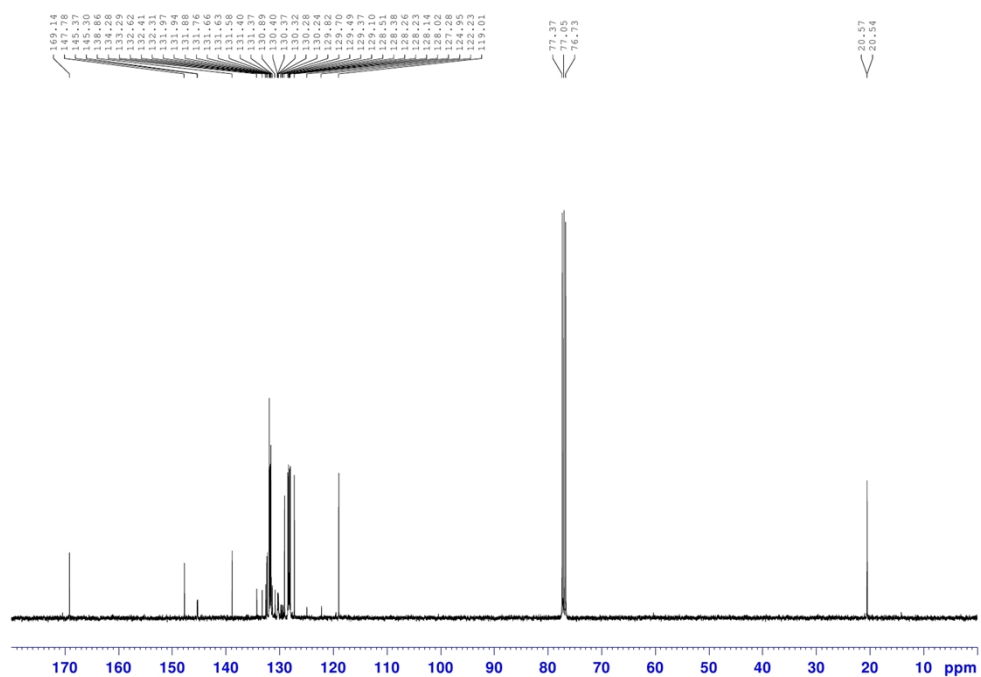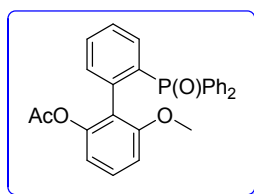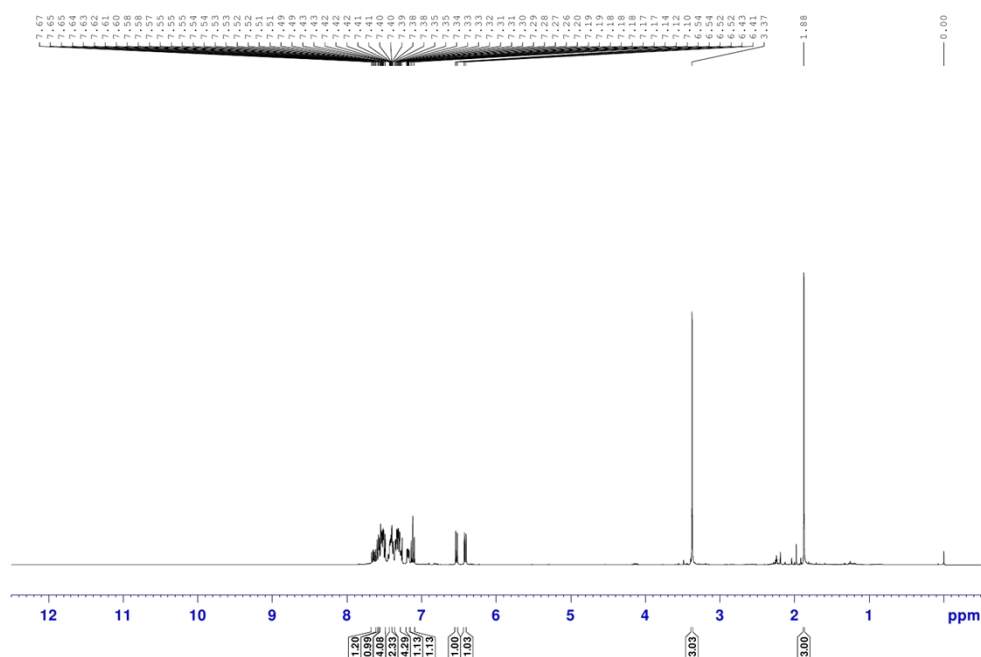

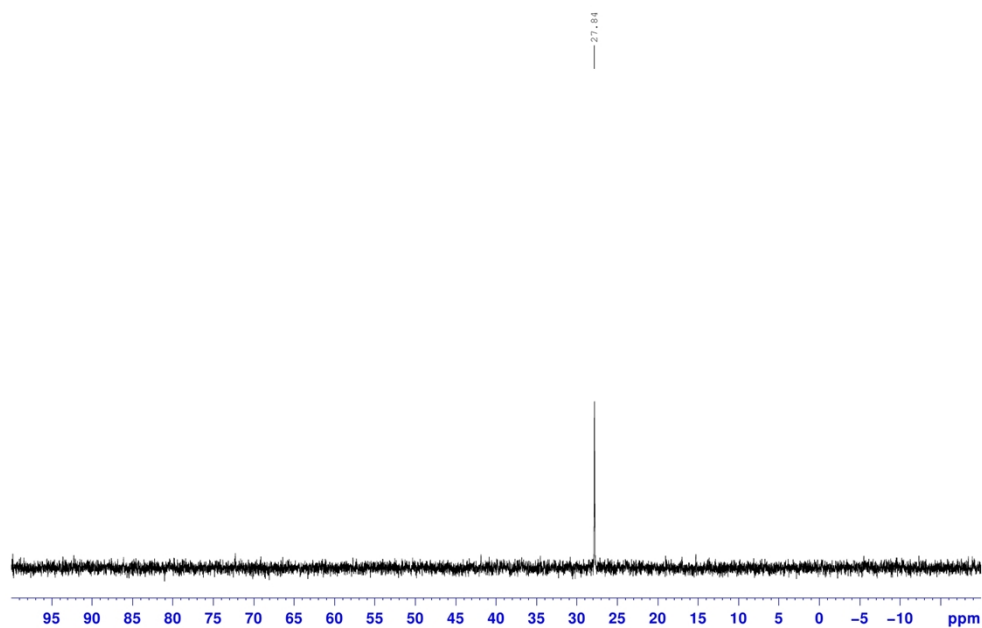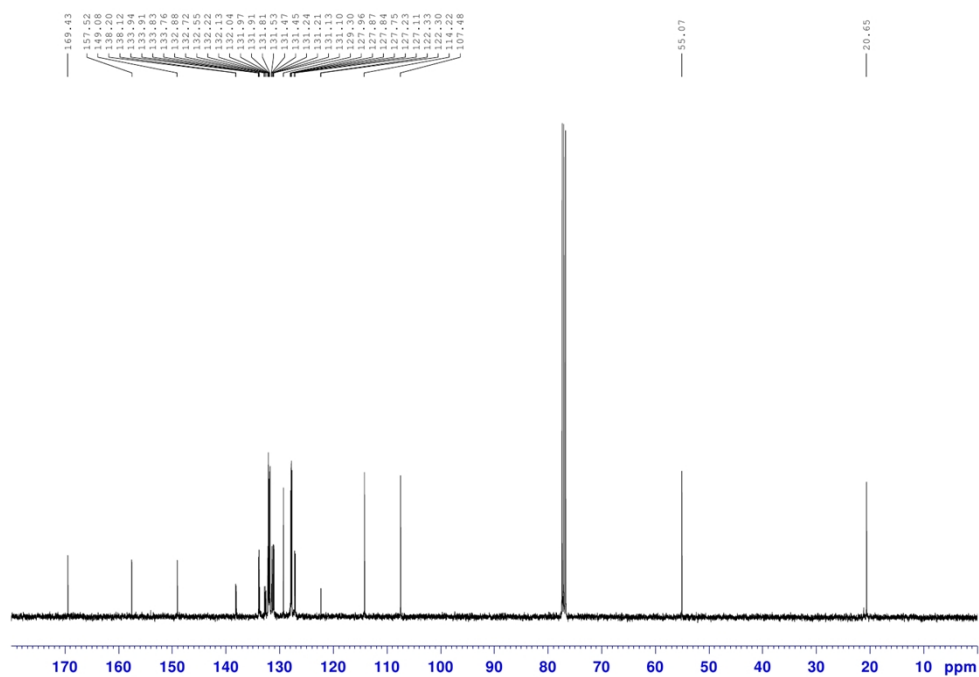

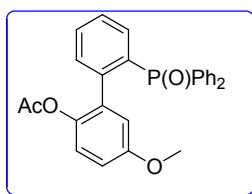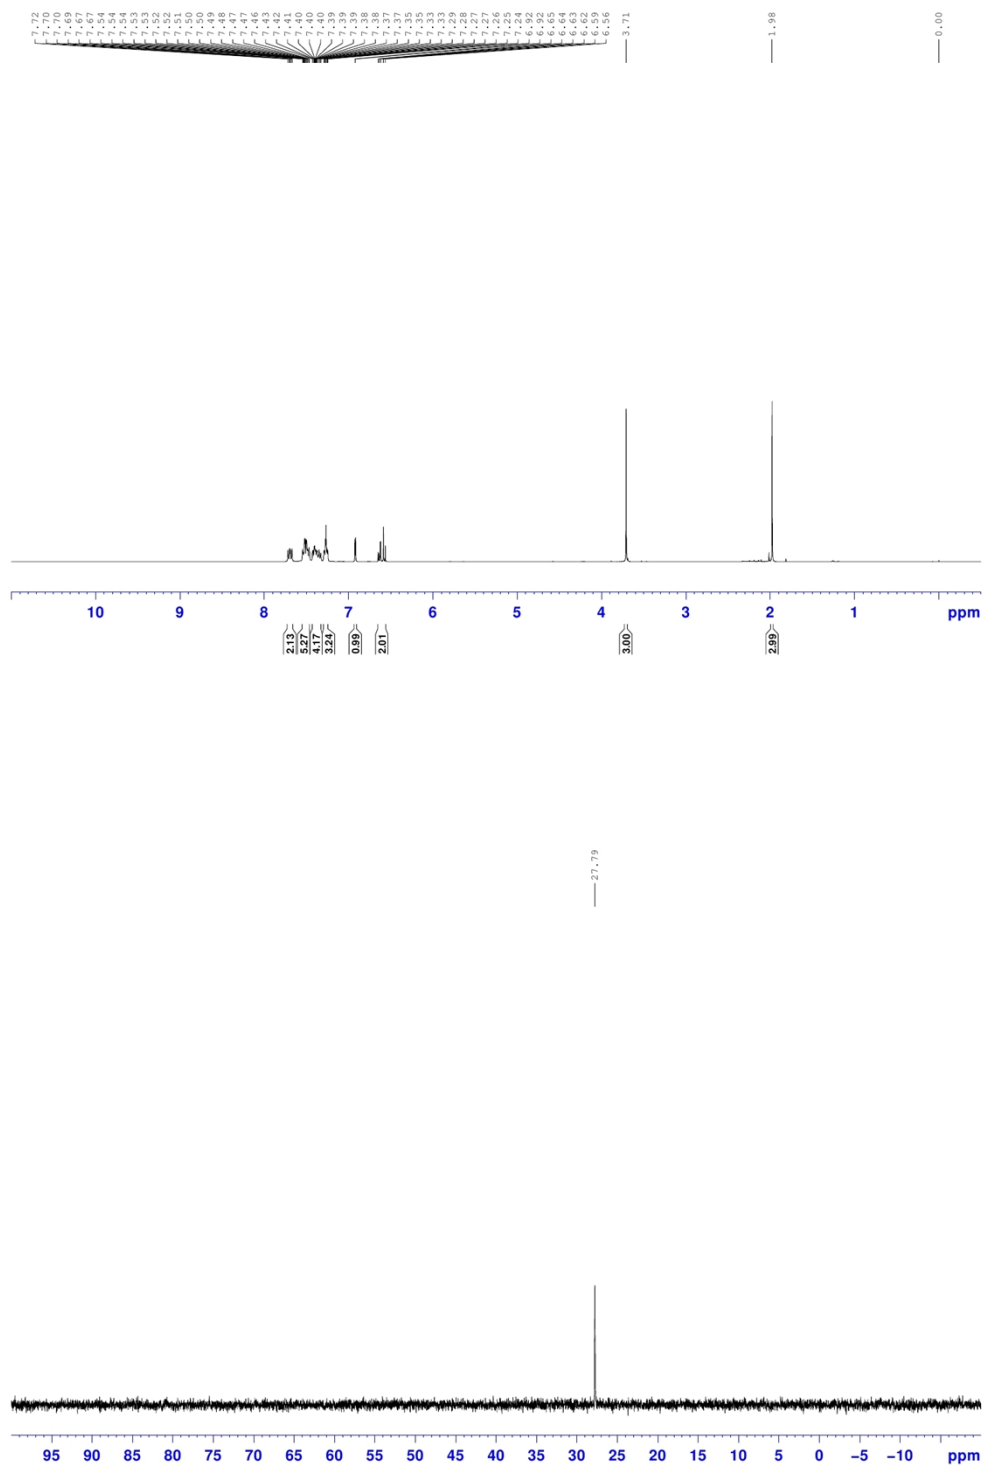

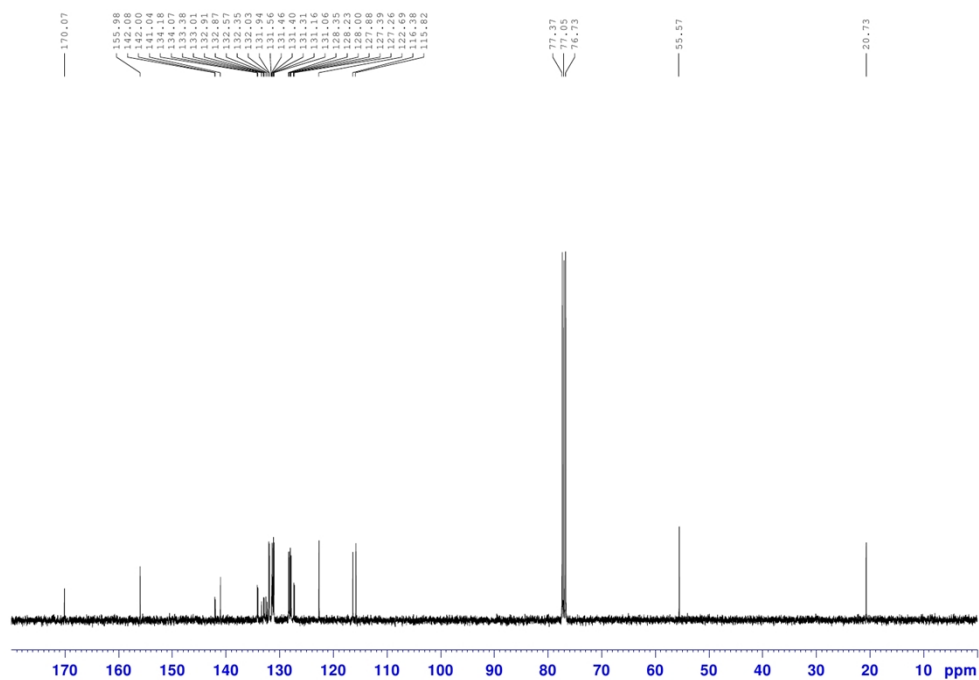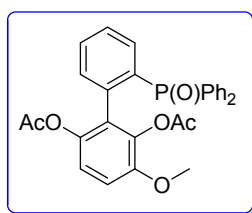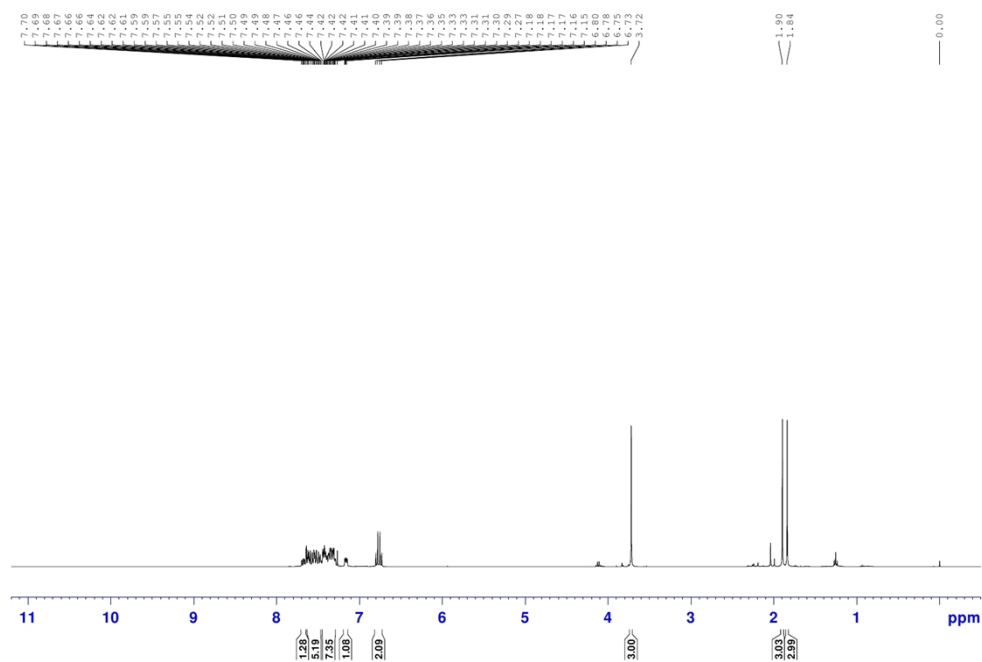

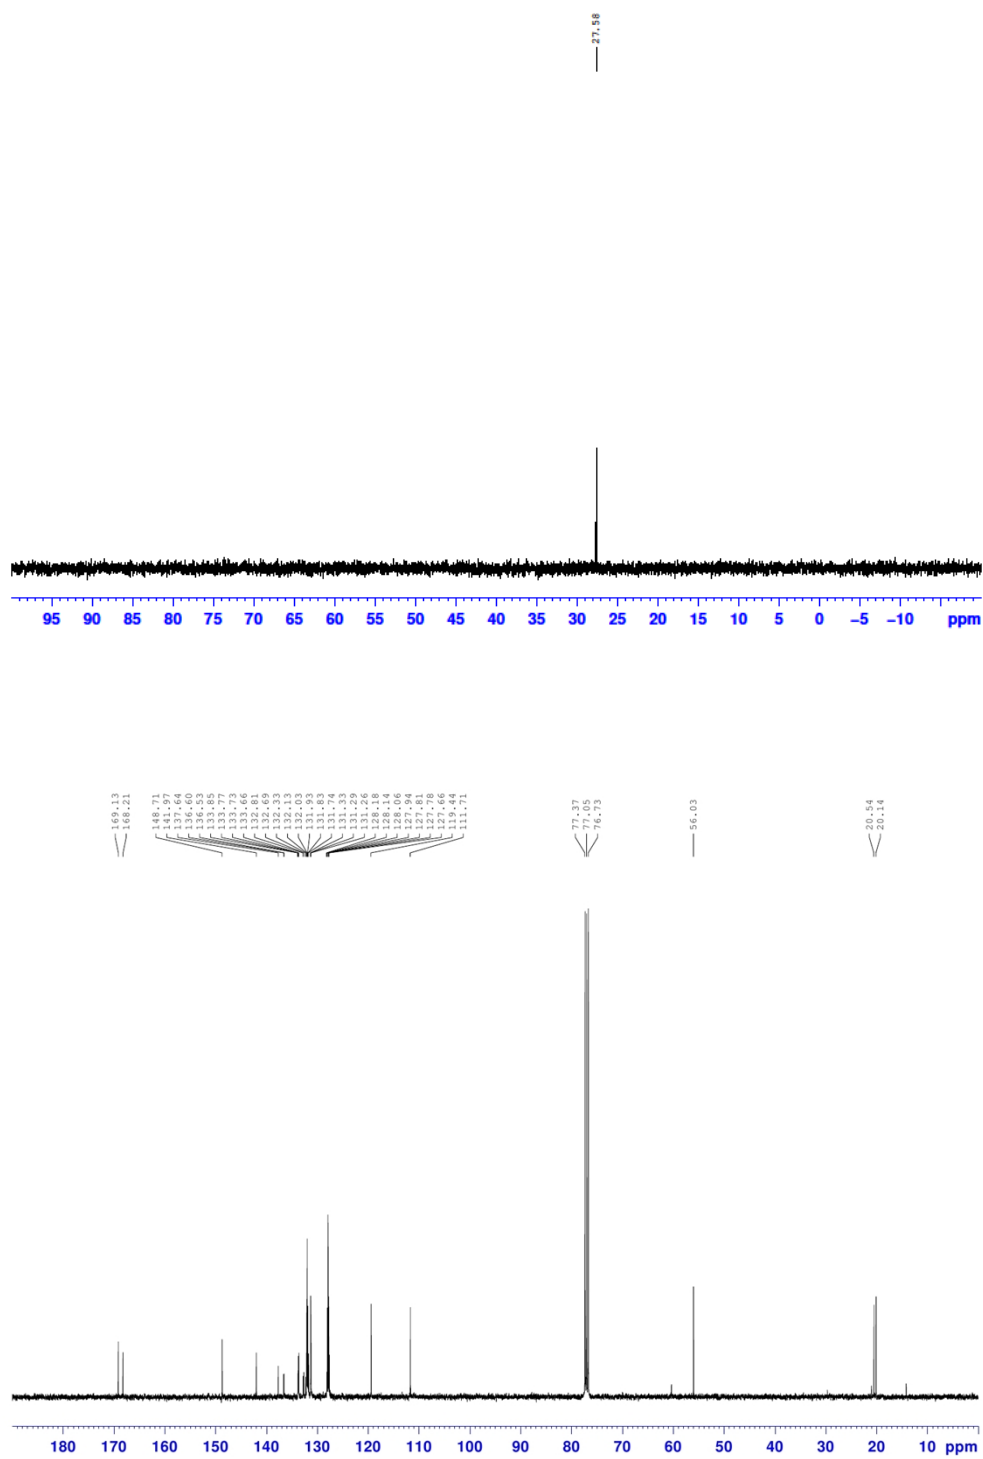

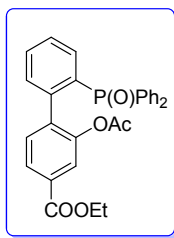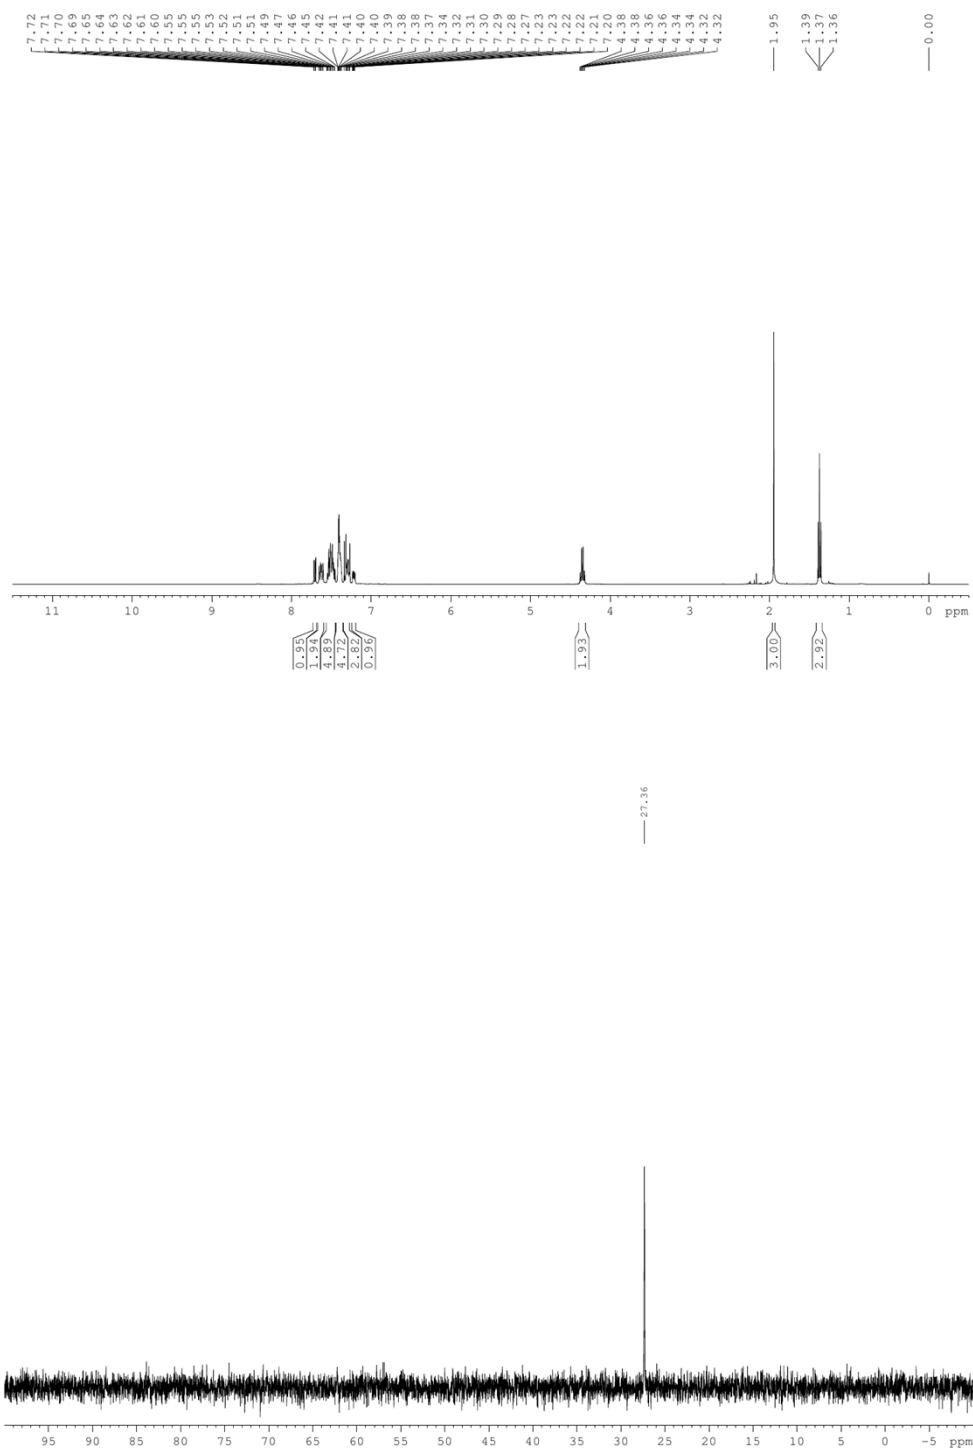

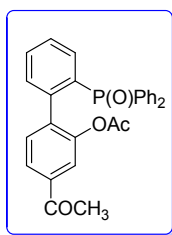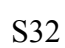

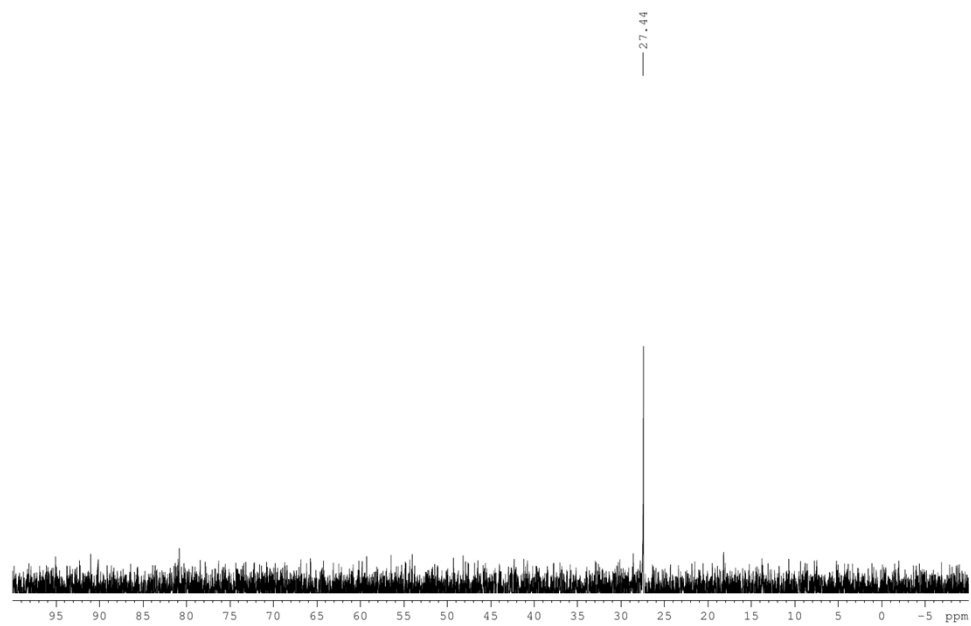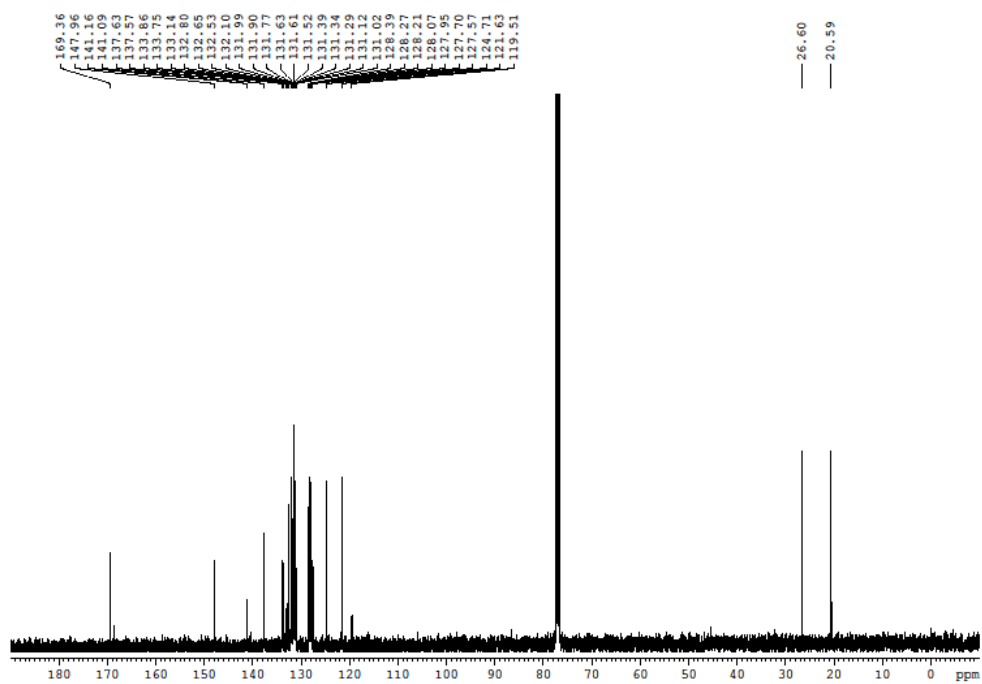

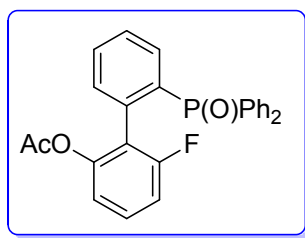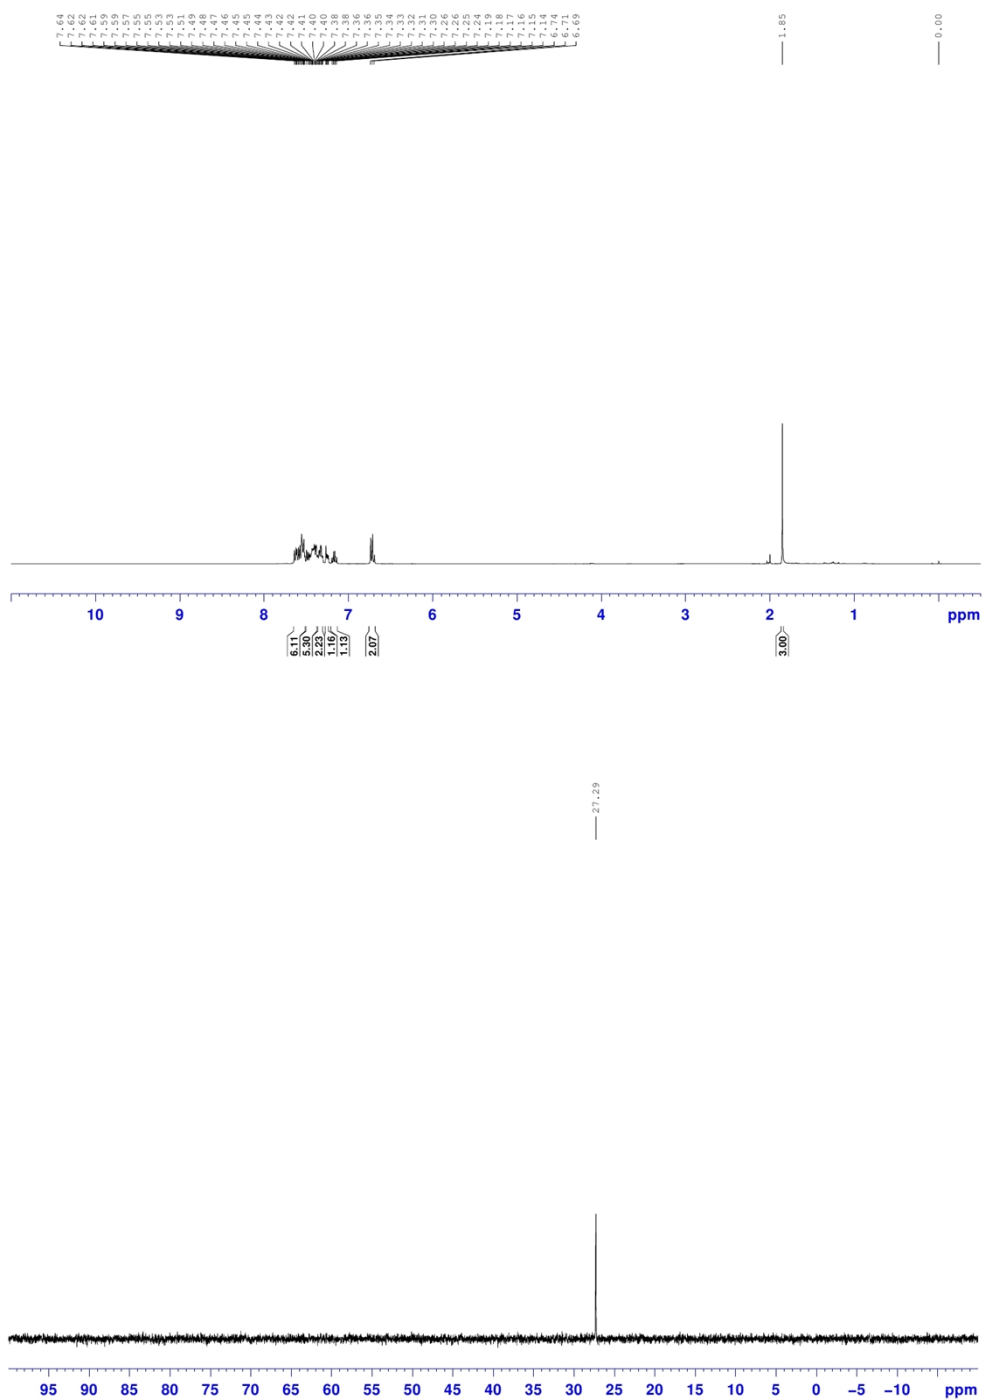

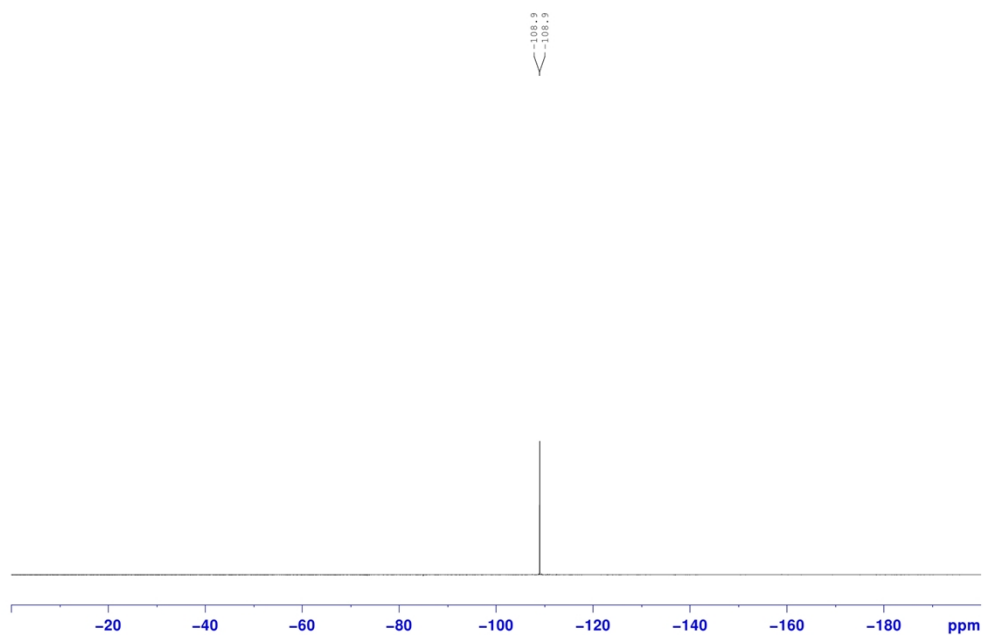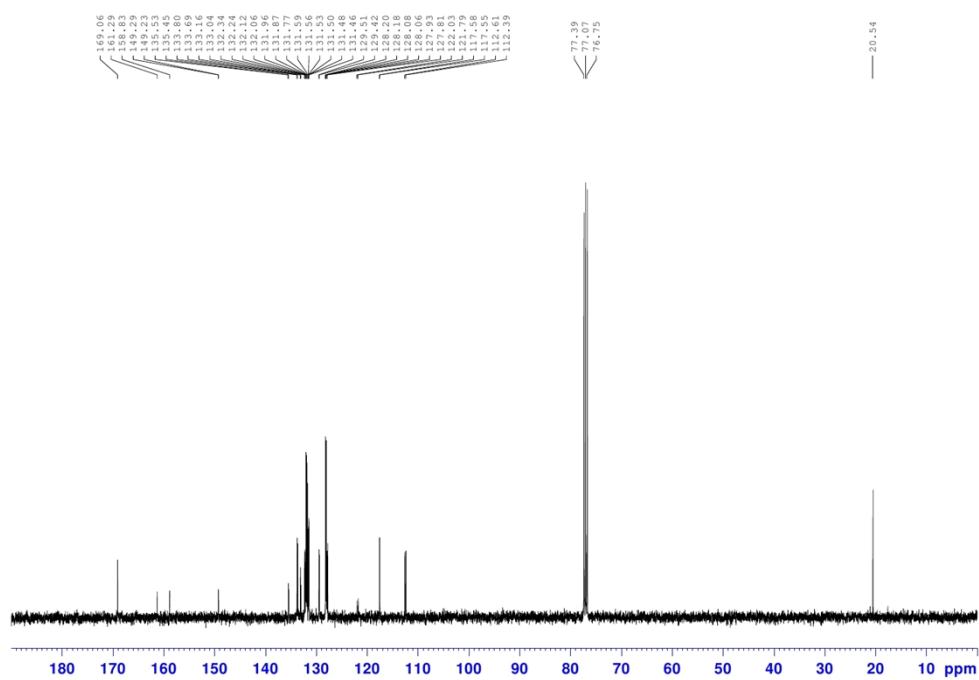

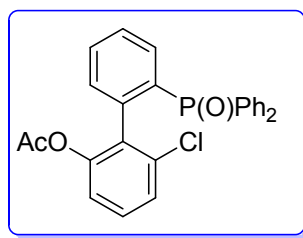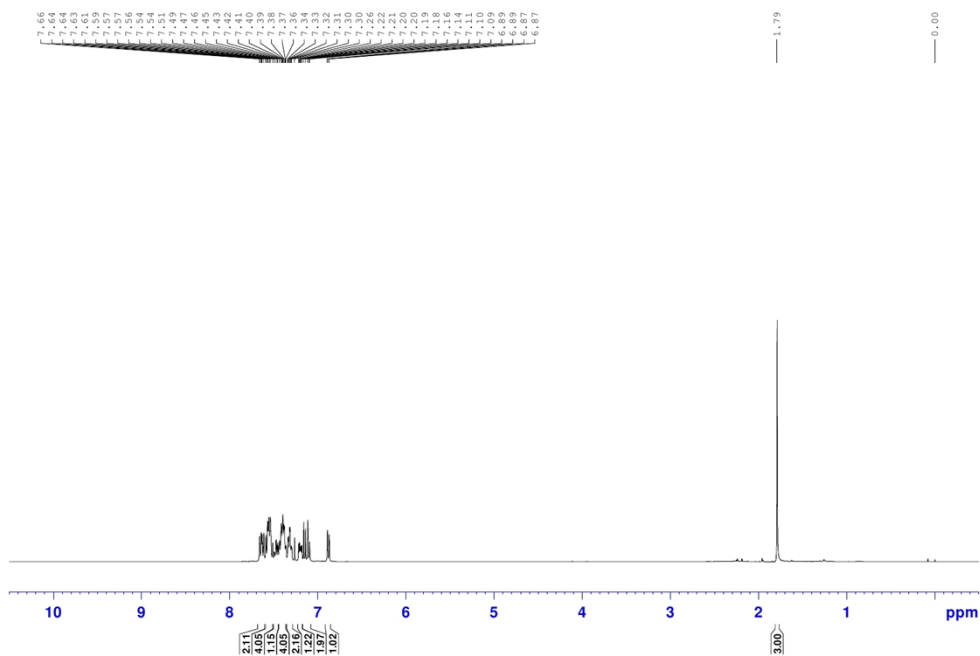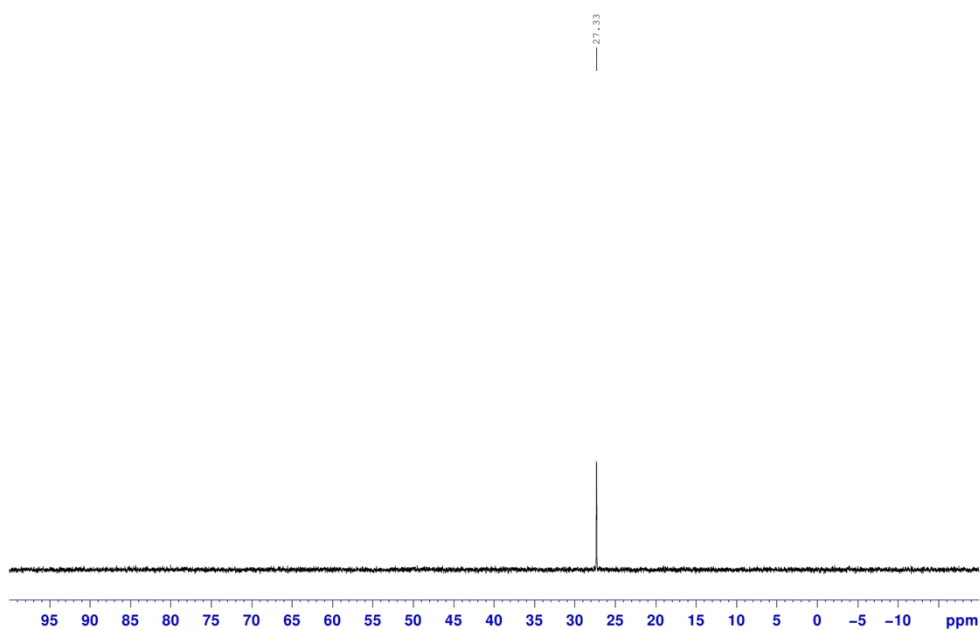

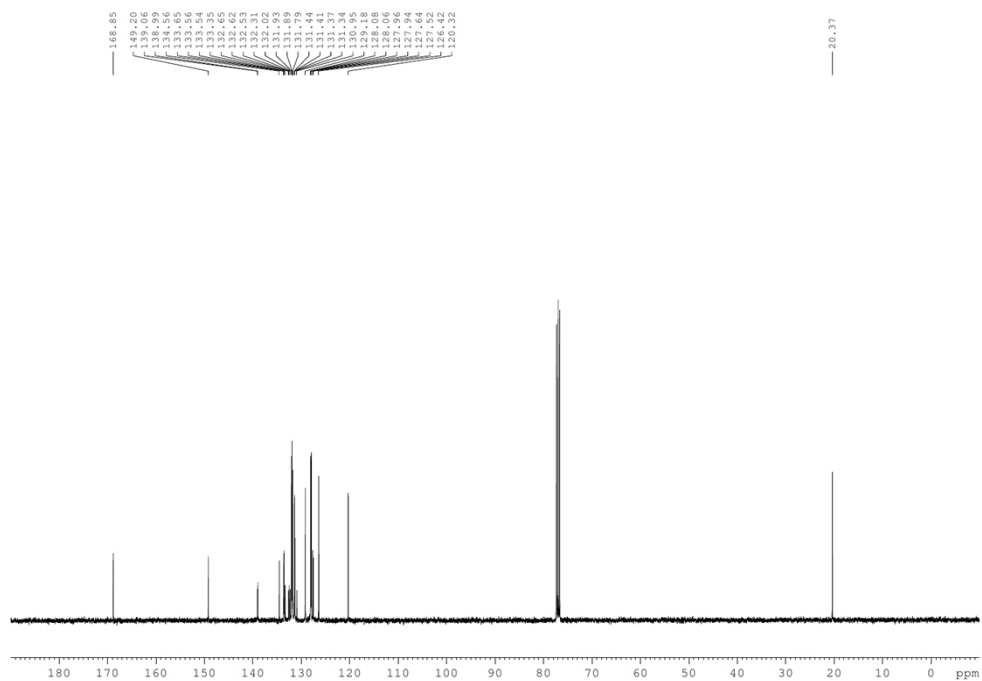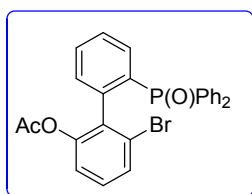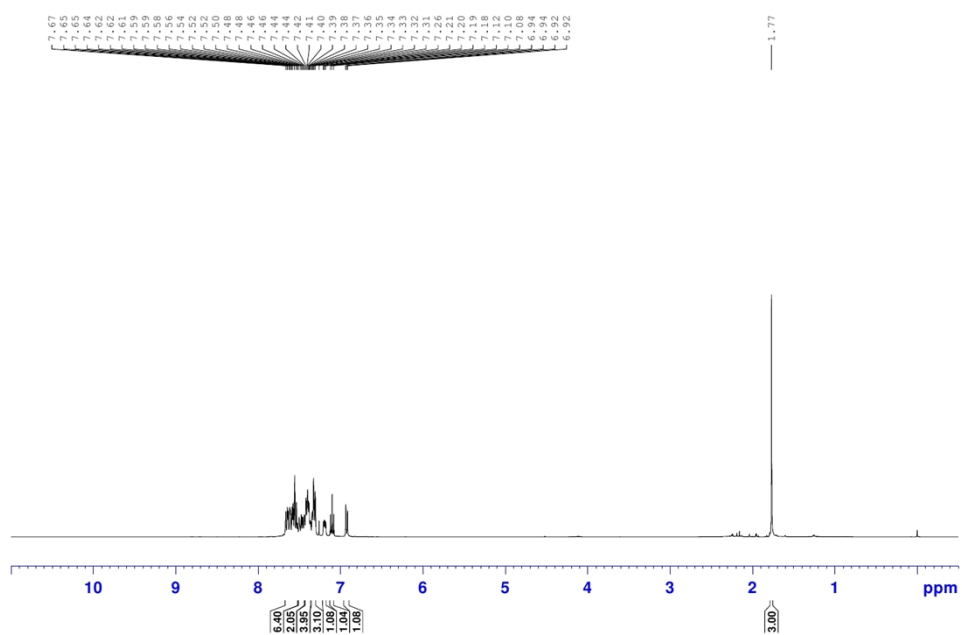

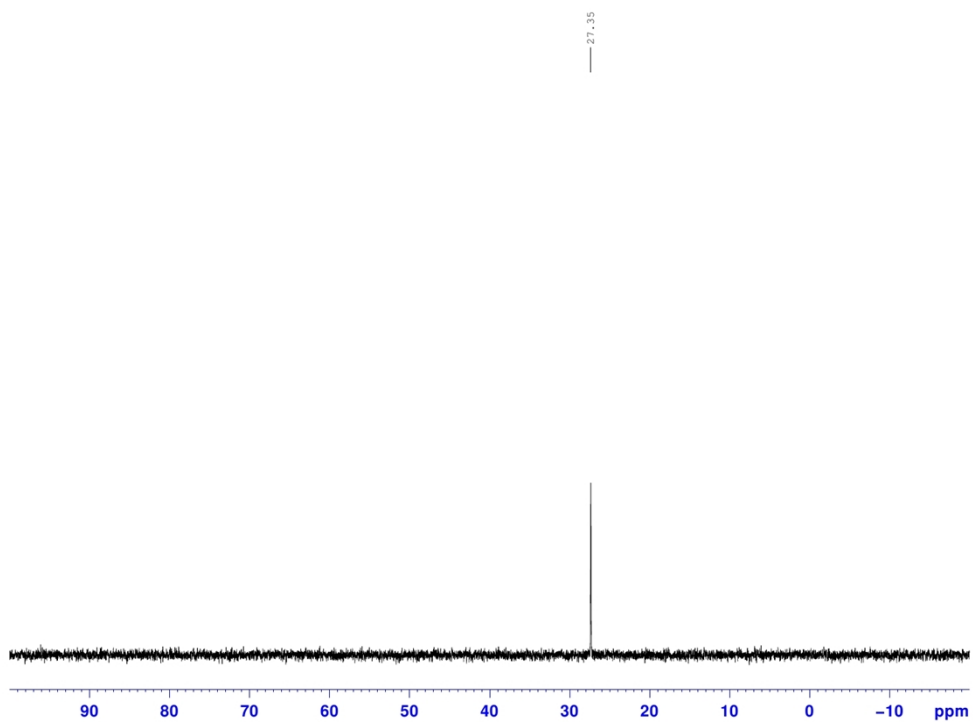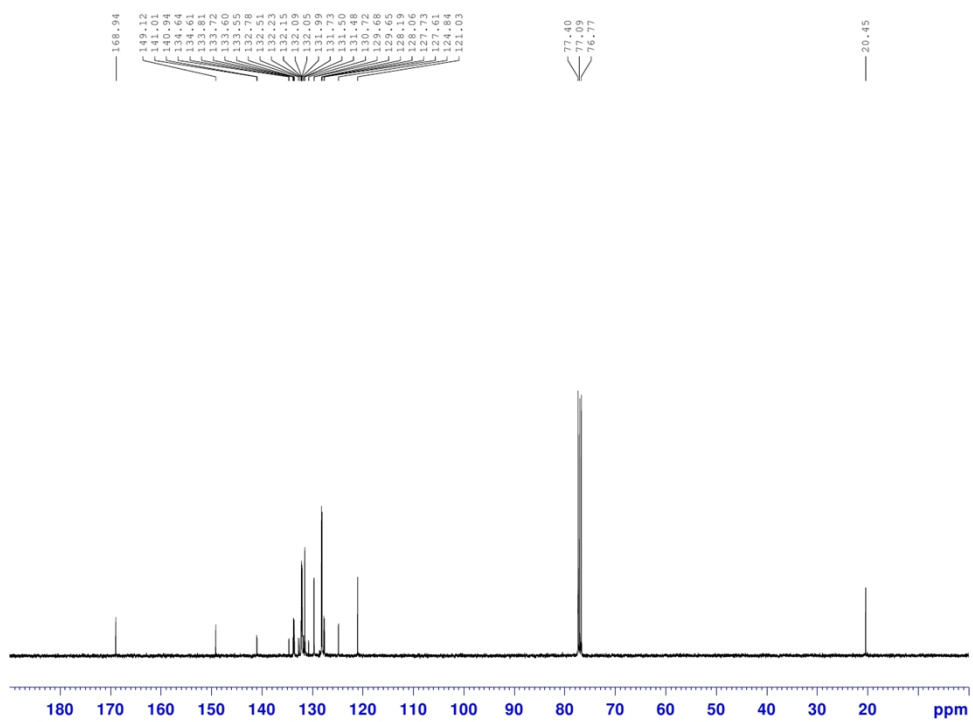

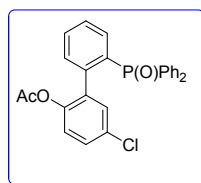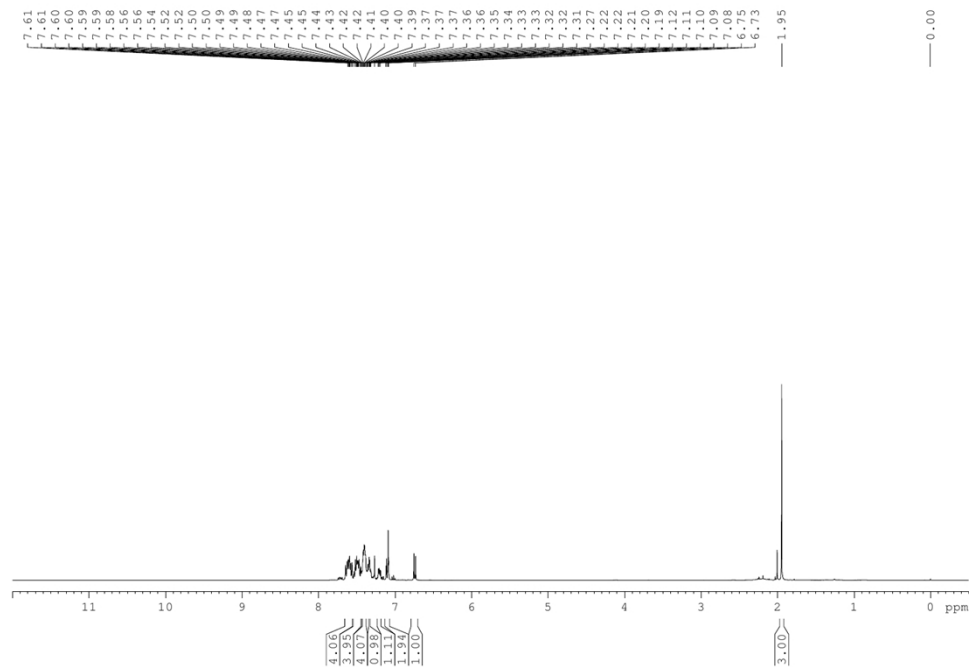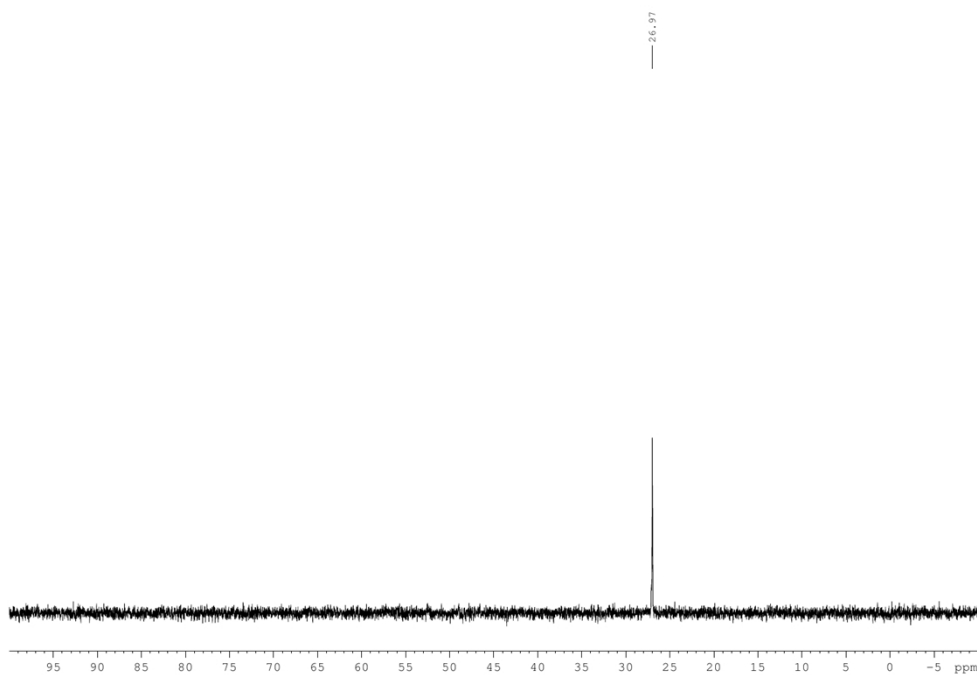

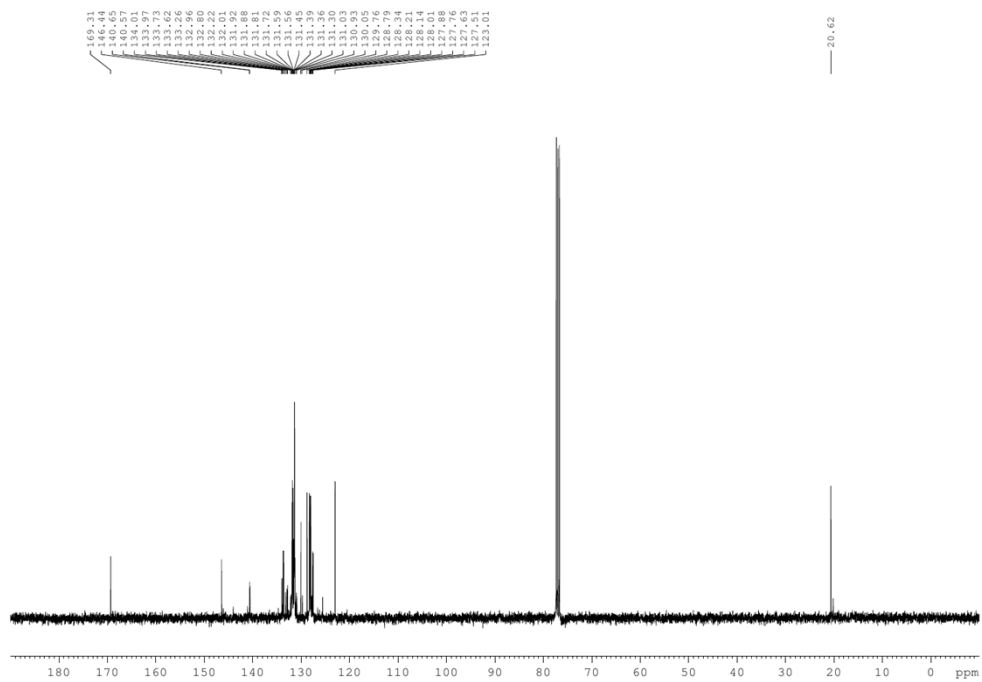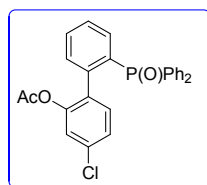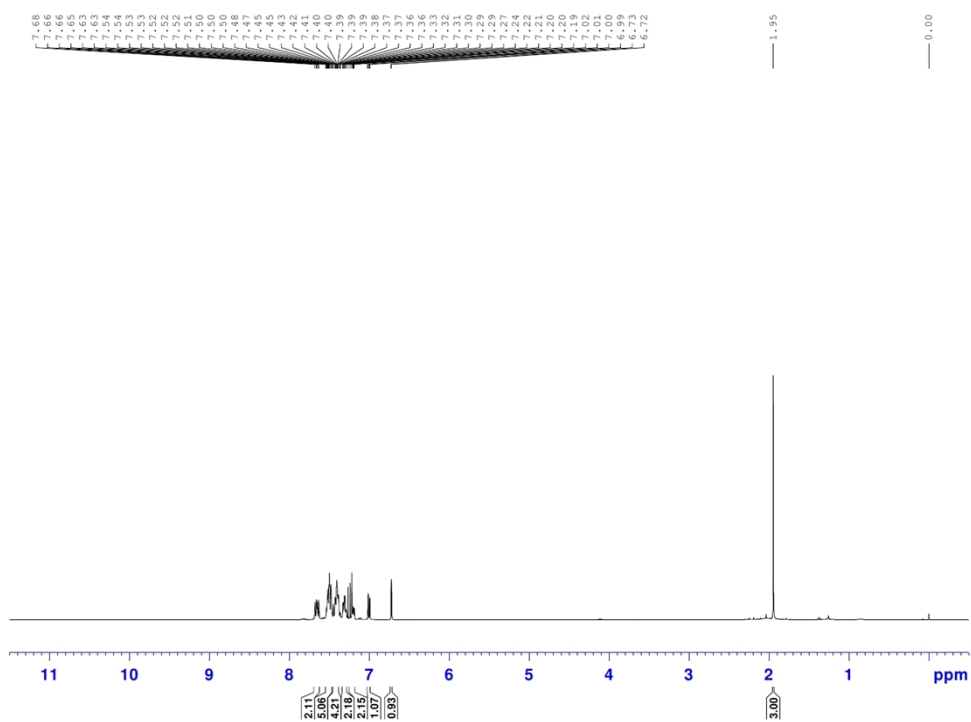

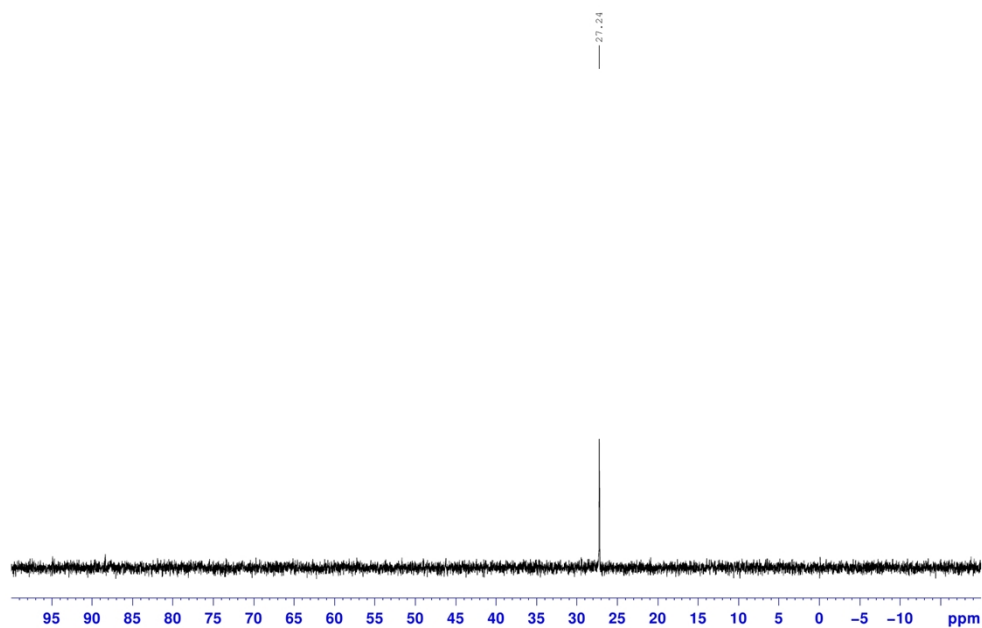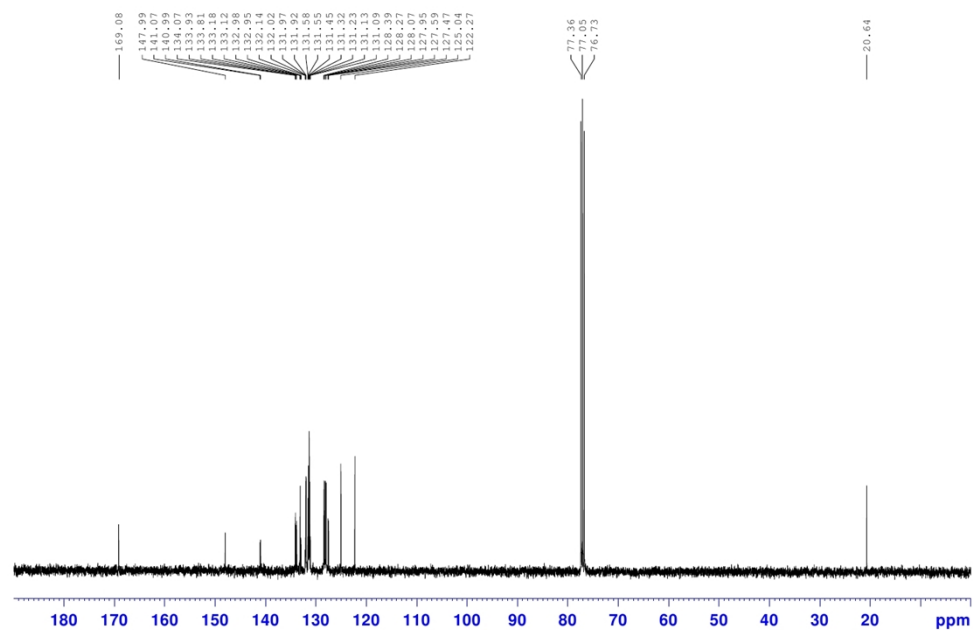

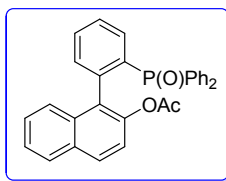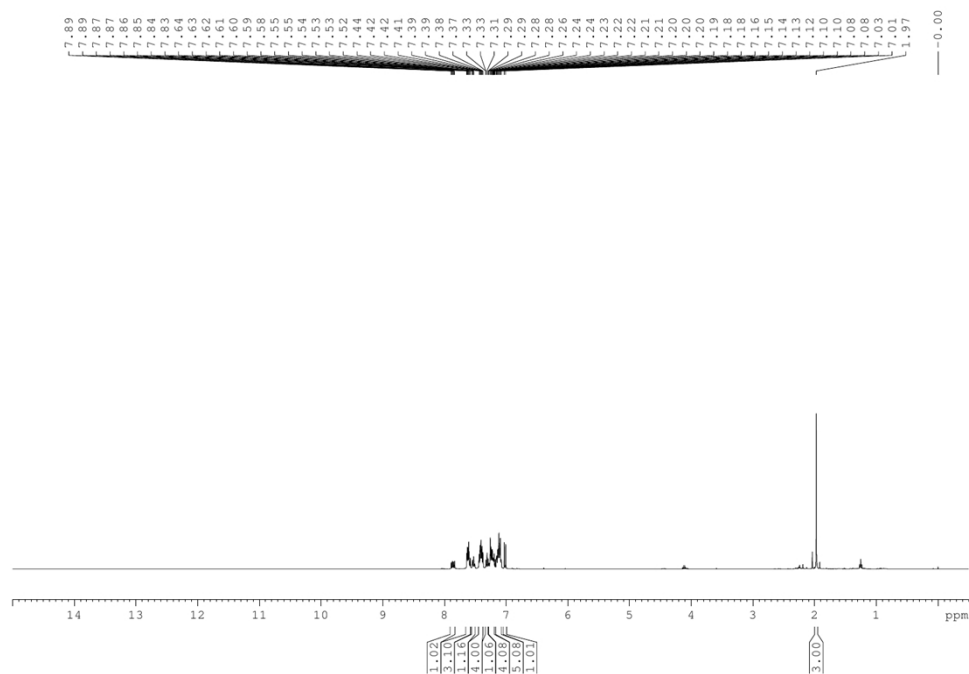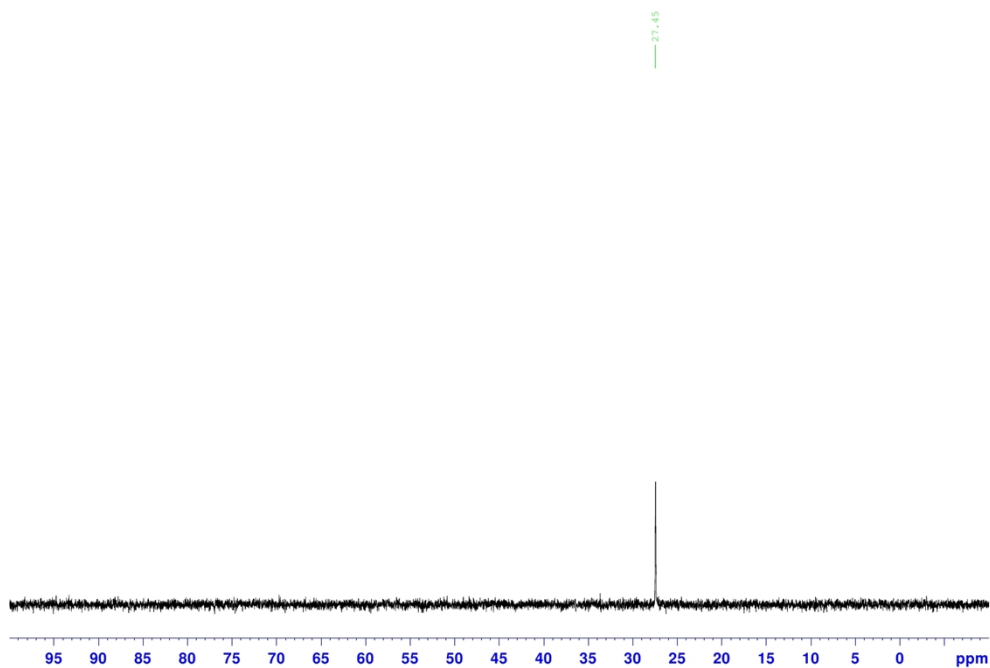

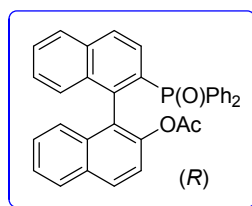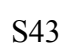

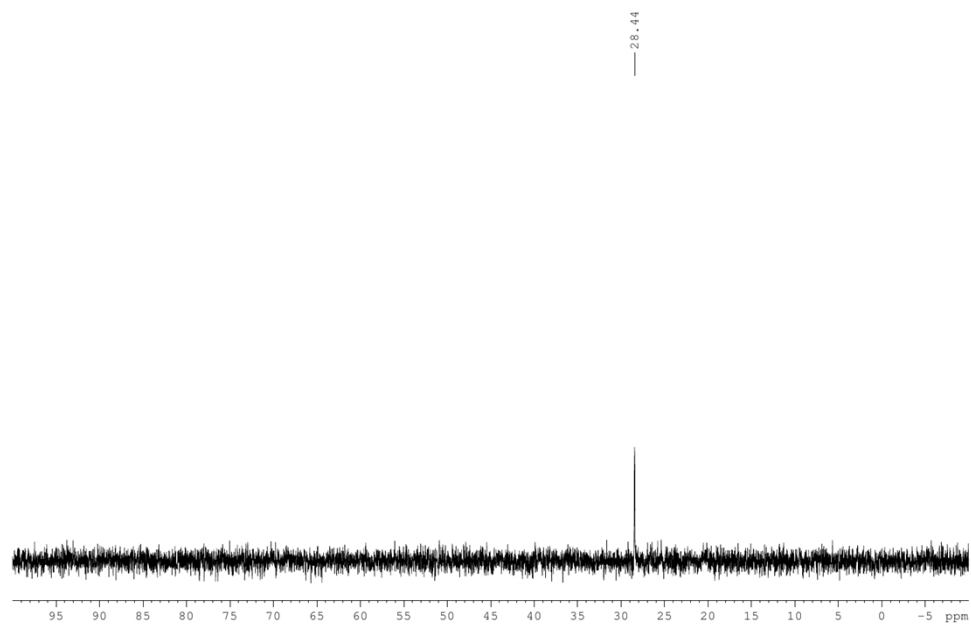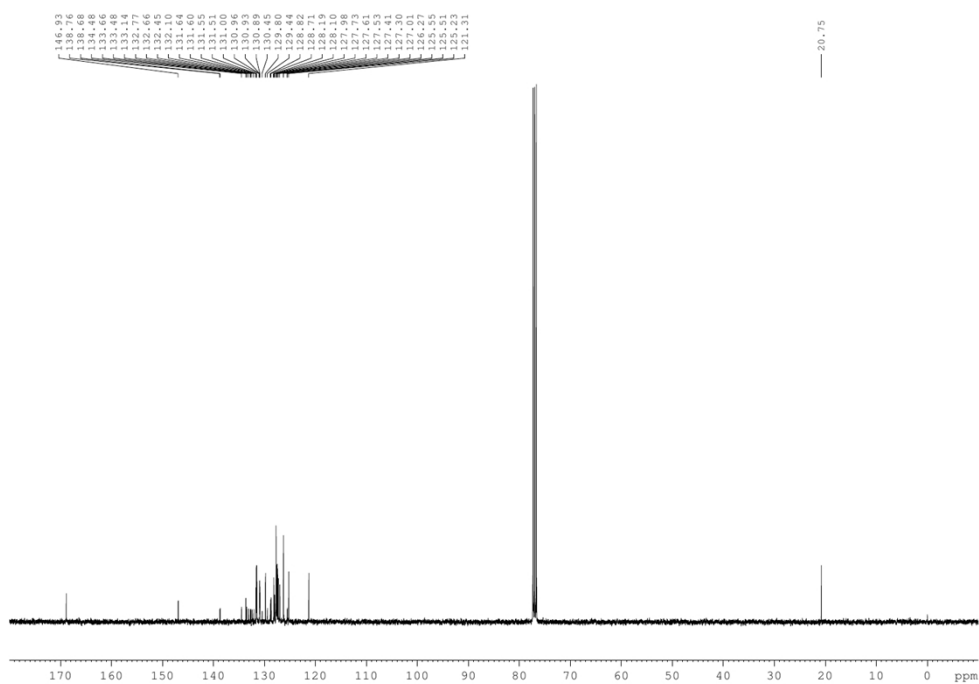

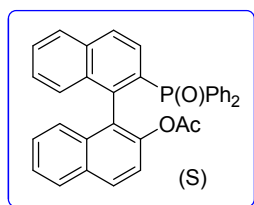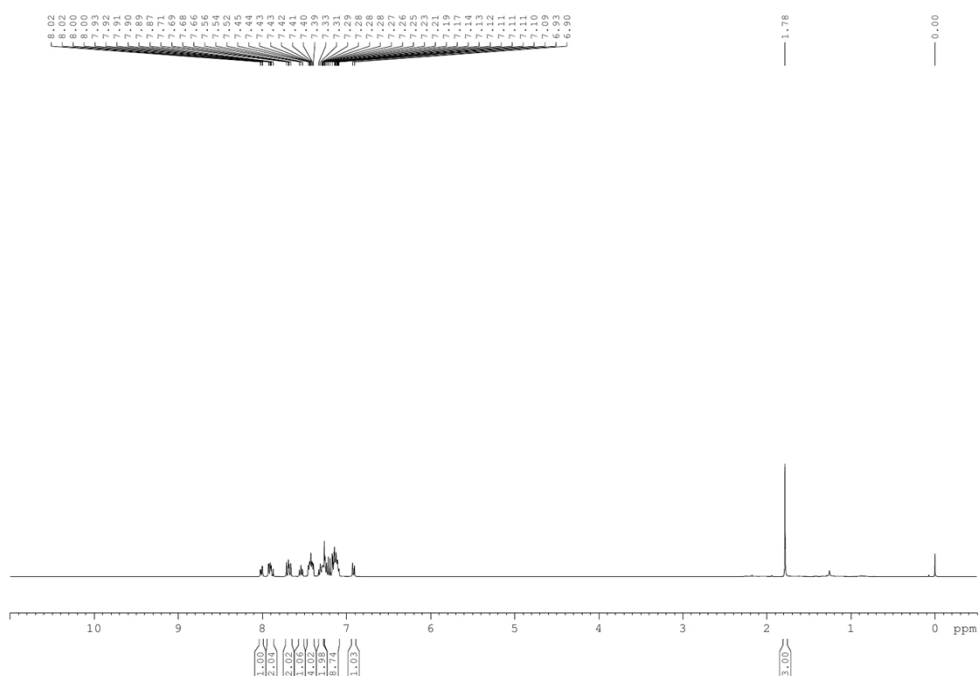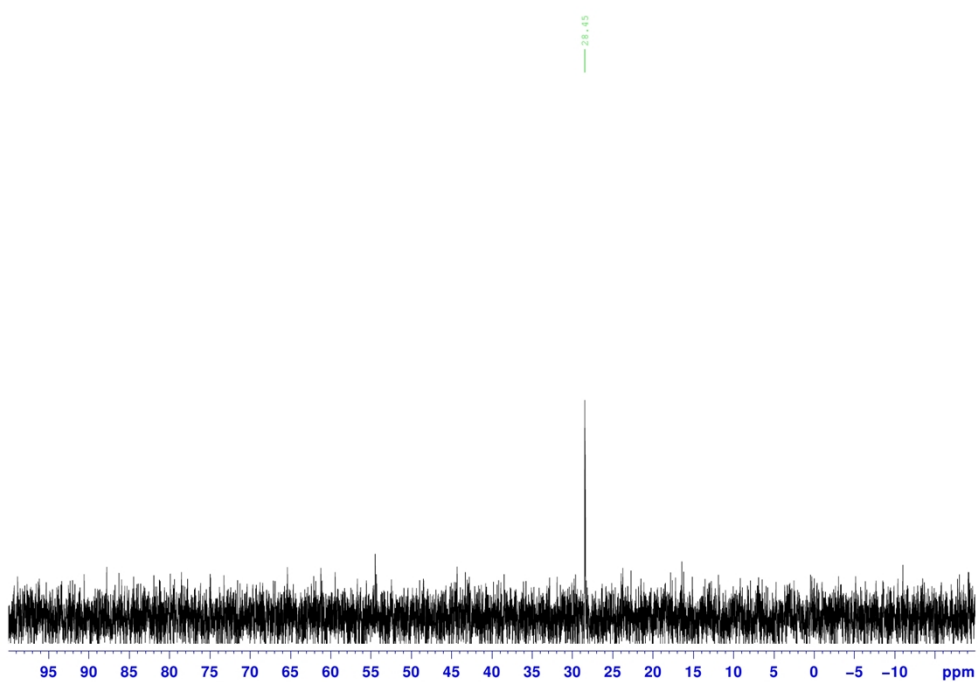

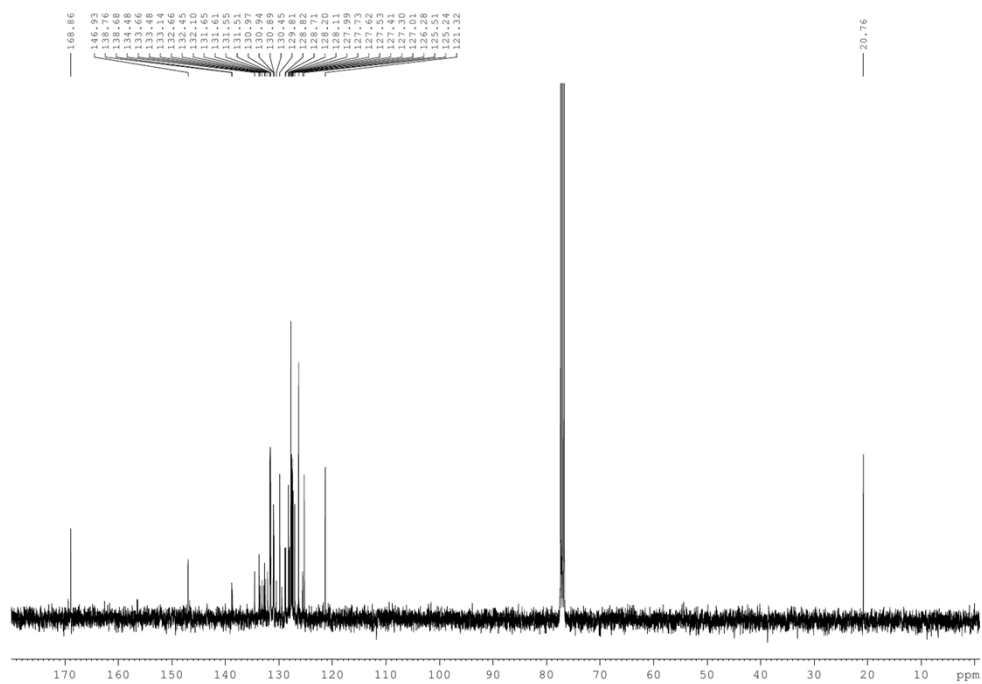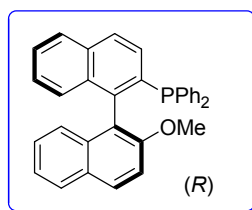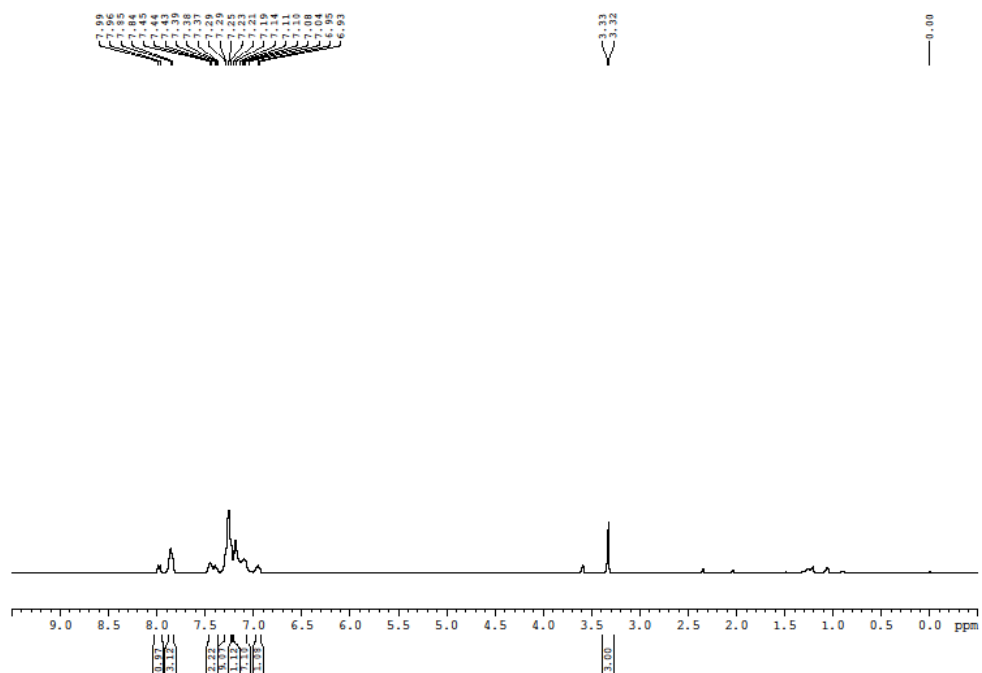

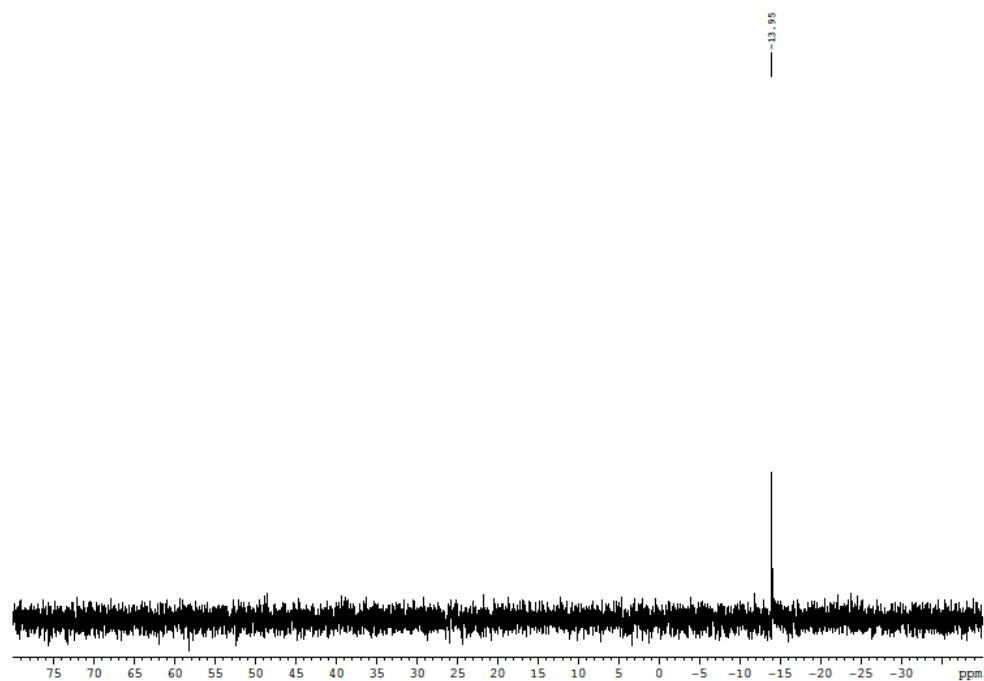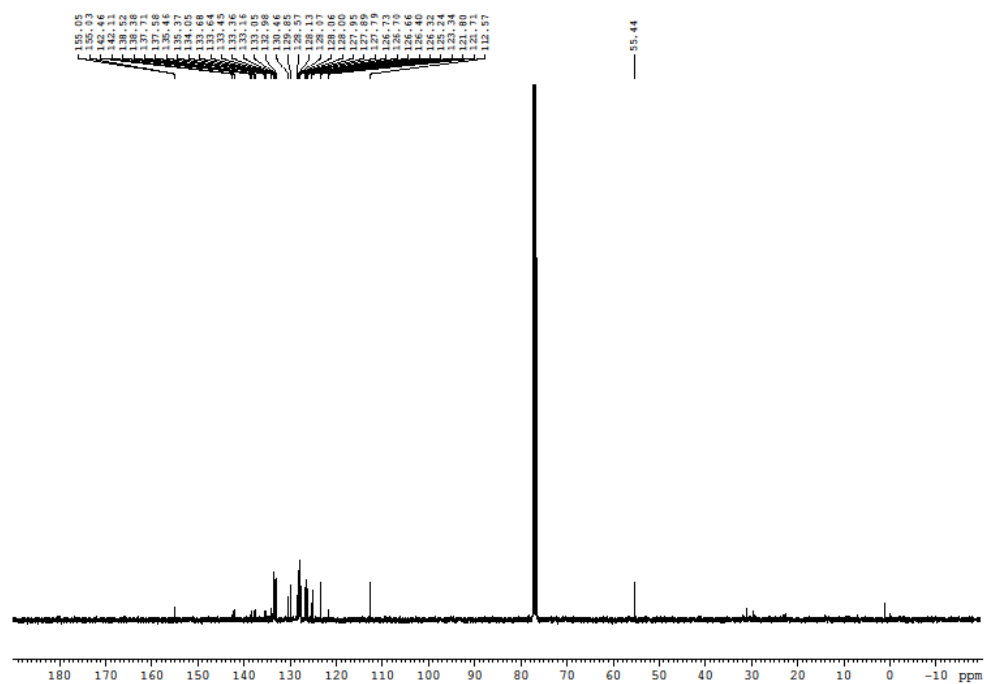

VIII Copies of HPLC spectra

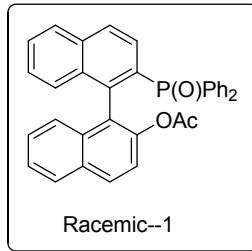

User name: System

Project name: A2014

Sample Information

|                                  |                                          |
|----------------------------------|------------------------------------------|
| Sample name: zhangheng140110-5rs | Collector: System                        |
| Sample type: unknow              | Collect time: 2014-1-210 16:31:17        |
| Number: 1                        | Group of collection: zhangheng20140103   |
| Times of injection: 5            | Processing time: 2014-1-10 19:20:07      |
| Volume of injection: 5.00 µL     | Processing method: zhangheng2014011005rs |
| Runtime: 120.0 Miuntes           | Channel name: Wvln Ch1                   |
| Sample group's name:             | Processing channel notes: PDA 230.0 nm   |

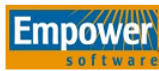

用户名称: System

项目名称: A2014

进样综合报告 报告

样品信息

|        |                      |         |                       |
|--------|----------------------|---------|-----------------------|
| 样品名称:  | zhangheng 140110-5rs | 采集者:    | System                |
| 样品类型:  | 未知                   | 采集时间:   | 2014-1-10 16:31:17    |
| 瓶号:    | 1                    | 采集方法组:  | zhangheng20140103     |
| 进样次数:  | 5                    | 处理日期:   | 2014-1-10 19:20:07    |
| 进样体积:  | 5.00 ul              | 处理方法:   | zhangheng2014011005rs |
| 运行时间:  | 120.0 Minutes        | 通道名称:   | Wvln Ch1              |
| 样品组名称: |                      | 处理通道注释: | PDA 230.0 纳米          |

自动标尺色谱图

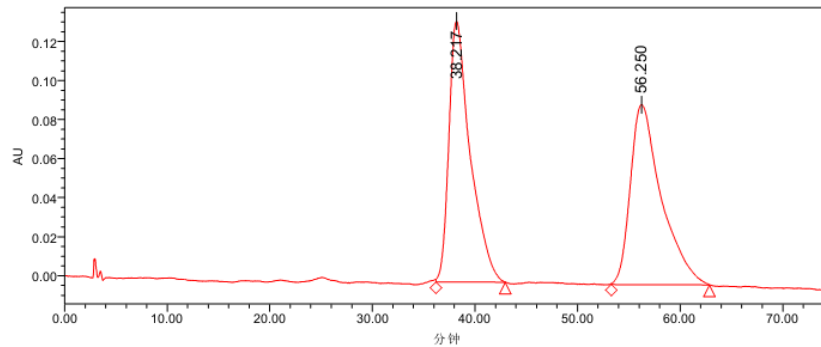

SampleName zhangheng 140110-5rs; Vial 1; Injection 5; Channel W2996 ; Date Acquired 2014-1-10 16:31:17

处理通道: PDA 230.0 纳米

|   | 处理通道         | 保留时间<br>(分钟) | 面积       | % 面积  | 峰高     |
|---|--------------|--------------|----------|-------|--------|
| 1 | PDA 230.0 纳米 | 38.217       | 19297959 | 49.95 | 133673 |
| 2 | PDA 230.0 纳米 | 56.250       | 19338567 | 50.05 | 92188  |

Processing channel: PDA 230.00 nm

|   | Processing channel | Retention time<br>(minute) | Area     | Area % | Peak height |
|---|--------------------|----------------------------|----------|--------|-------------|
| 1 | PDA 230.0 nm       | 38.217                     | 19297959 | 49.95  | 133673      |
| 2 | PDA 230.0 nm       | 56.250                     | 19338567 | 50.05  | 92188       |

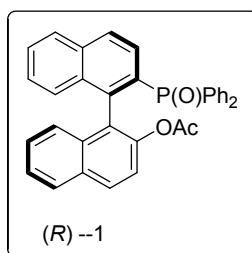

User name: System

Project name: A2014

#### Sample Information

|                                   |                                         |
|-----------------------------------|-----------------------------------------|
| Sample name: zhangheng140110-4r   | Collector: System                       |
| Sample type: unknown              | Collect time: 2014-1-210 15:14:12       |
| Number: 1                         | Group of collection: zhangheng20140103  |
| Times of injection: 4             | Processing time: 2014-1-10 19:14:16     |
| Volume of injection: 5.00 $\mu$ L | Processing method: zhangheng2014011004r |
| Runtime: 120.0 Minutes            | Channel name: Wvln Ch1                  |
| Sample group's name:              | Processing channel notes: PDA 230.0 nm  |

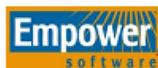

用户名称: System

项目名称: A2014

#### 进样综合报告 报告

#### 样品信息

|        |                    |         |                      |
|--------|--------------------|---------|----------------------|
| 样品名称:  | zhangheng140110-4r | 采集者:    | System               |
| 样品类型:  | 未知                 | 采集时间:   | 2014-1-10 15:14:12   |
| 瓶号:    | 1                  | 采集方法组:  | zhangheng20140103    |
| 进样次数:  | 4                  | 处理日期:   | 2014-1-10 19:14:16   |
| 进样体积:  | 5.00 $\mu$ L       | 处理方法:   | zhangheng2014011004r |
| 运行时间:  | 120.0 Minutes      | 通道名称:   | Wvln Ch1             |
| 样品组名称: |                    | 处理通道注释: | PDA 230.0 纳米         |

#### 自动标尺色谱图

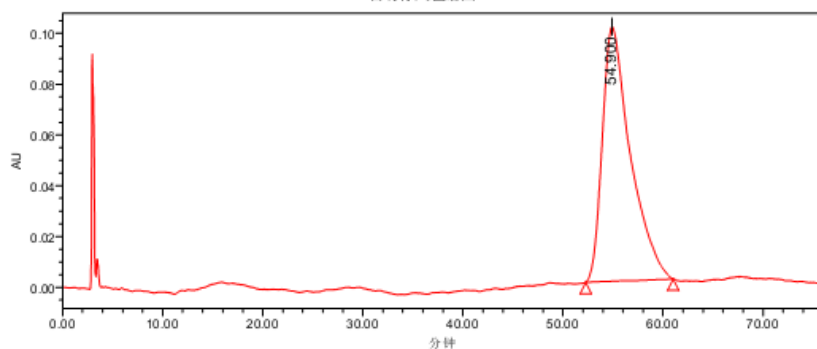

#### 处理通道: PDA 230.0 纳米

|   | 处理通道         | 保留时间<br>(分钟) | 面积       | % 面积   | 峰高     |
|---|--------------|--------------|----------|--------|--------|
| 1 | PDA 230.0 纳米 | 54.900       | 19557067 | 100.00 | 100272 |

#### Processing channel: PDA 230.0 nm

|   | Processing channel | Retention time<br>(minute) | Area     | Area % | Peak height |
|---|--------------------|----------------------------|----------|--------|-------------|
| 1 | PDA 230.0 nm       | 54.900                     | 19557067 | 100.00 | 100272      |

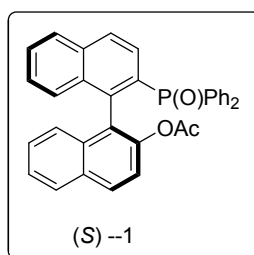

User name: System

Project name: A2014

| Sample Information              |                                         |
|---------------------------------|-----------------------------------------|
| Sample name: zhangheng140110-6s | Collector: System                       |
| Sample type: unknow             | Collect time: 2014-1-210 17:47:08       |
| Number: 1                       | Group of collection: zhangheng20140103  |
| Times of injection: 6           | Processing time: 2014-1-10 19:17:49     |
| Volume of injection: 5.00 µL    | Processing method: zhangheng2014011006s |
| Runtime: 120.0 Minutes          | Channel name: Wvln Ch1                  |
| Sample group's name:            | Processing channel notes: PDA 230.0 nm  |

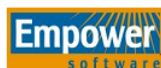

## 进样综合报告 报告

用户名称: System

项目名称: A2014

### 样品信息

|        |                     |         |                      |
|--------|---------------------|---------|----------------------|
| 样品名称:  | zhangheng 140110-6s | 采集者:    | System               |
| 样品类型:  | 未知                  | 采集时间:   | 2014-1-10 17:47:08   |
| 瓶号:    | 1                   | 采集方法组:  | zhangheng20140103    |
| 进样次数:  | 6                   | 处理日期:   | 2014-1-10 19:17:49   |
| 进样体积:  | 5.00 ul             | 处理方法:   | zhangheng2014011006s |
| 运行时间:  | 120.0 Minutes       | 通道名称:   | Wvln Ch1             |
| 样品组名称: |                     | 处理通道注释: | PDA 230.0 纳米         |

自动标尺色谱图

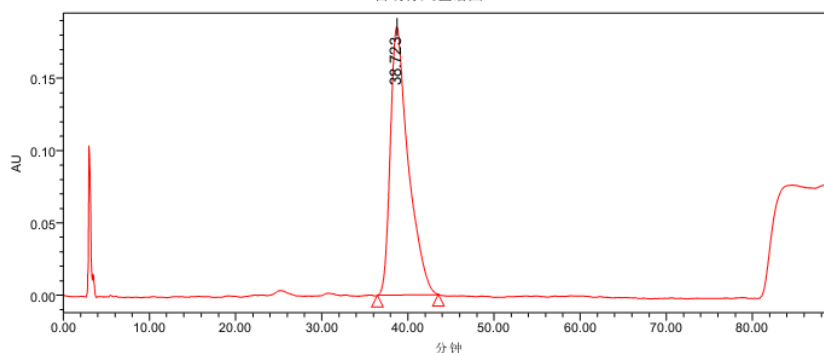

— SampleName zhangheng 140110-6s; Vial 1; Injection 6; Channel W2996 ; Date Acquired 2014-1-10 17:47:08

处理通道: PDA 230.0 纳米

|   | 处理通道         | 保留时间<br>(分钟) | 面积       | % 面积   | 峰高     |
|---|--------------|--------------|----------|--------|--------|
| 1 | PDA 230.0 纳米 | 38.723       | 26944821 | 100.00 | 185606 |

Processing channel: PDA 230.0 nm

|   | Processing channel | Retention time<br>(minute) | Area     | Area % | Peak height |
|---|--------------------|----------------------------|----------|--------|-------------|
| 1 | PDA 230.0 nm       | 38.723                     | 26944821 | 100.00 | 185606      |

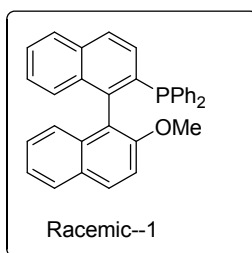

User name: System

Project name: A2014

#### Sample Information

|                                |                                        |
|--------------------------------|----------------------------------------|
| Sample name: zhangheng14011608 | Collector: System                      |
| Sample type: unknow            | Collect time: 2014-1-16 14:11:11       |
| Number: 1                      | Group of collection: zhangheng20140103 |
| Times of injection: 1          | Processing time: 2014-1-16 14:49:17    |
| Volume of injection: 5.00 µL   | Processing method: zhP3OMers           |
| Runtime: 120.0 Minutes         | Channel name: WvIn Ch1                 |
| Sample group's name:           | Processing channel notes: PDA 254.0 nm |

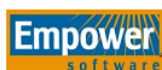

用户名称: System

项目名称: A2014

#### 进样综合报告 报告

#### 样品信息

|        |                   |         |                    |
|--------|-------------------|---------|--------------------|
| 样品名称:  | zhangheng14011608 | 采集者:    | System             |
| 样品类型:  | 未知                | 采集时间:   | 2014-1-16 14:11:11 |
| 瓶号:    | 1                 | 采集方法组:  | zhangheng20140103  |
| 进样次数:  | 1                 | 处理日期:   | 2014-1-16 14:49:17 |
| 进样体积:  | 5.00 ul           | 处理方法:   | zhP3OMers          |
| 运行时间:  | 120.0 Minutes     | 通道名称:   | WvIn Ch4           |
| 样品组名称: |                   | 处理通道注释: | PDA 254.0 纳米       |

自动标尺色谱图

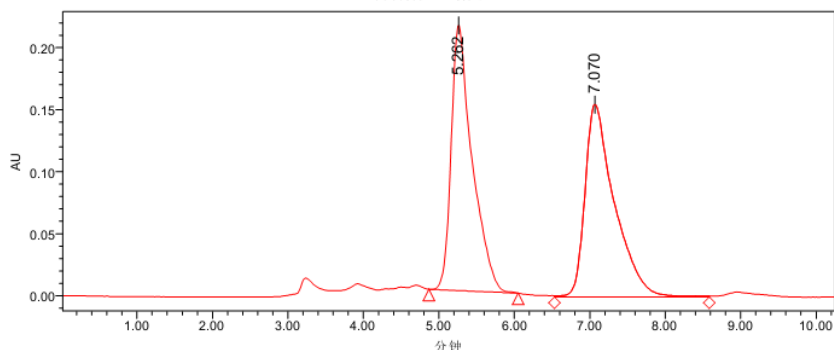

— SampleName zhangheng 14011608; Vial 1; Injection 1; Channel W2996 ; Date Acquired 2014-1-16 14:11:11

#### 处理通道: PDA 254.0 纳米

| 处理通道           | 保留时间<br>(分钟) | 面积      | % 面积  | 峰高     |
|----------------|--------------|---------|-------|--------|
| 1 PDA 254.0 纳米 | 5.262        | 4138398 | 49.49 | 214263 |
| 2 PDA 254.0 纳米 | 7.070        | 4222996 | 50.51 | 155545 |

#### Processing channel: PDA 254.00 nm

|   | Processing channel | Retention time<br>(minute) | Area    | Area % | Peak height |
|---|--------------------|----------------------------|---------|--------|-------------|
| 1 | PDA 254.0 nm       | 5.262                      | 4138398 | 49.49  | 214263      |
| 2 | PDA 254.0 nm       | 7.070                      | 422996  | 50.51  | 155545      |

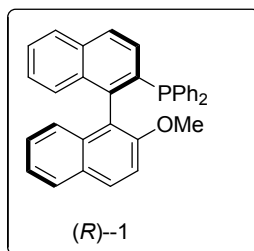

User name: System

Project name: A2014

#### Sample Information

|                                |                                        |
|--------------------------------|----------------------------------------|
| Sample name: zhangheng14011610 | Collector: System                      |
| Sample type: unknow            | Collect time: 2014-1-16 14:36:28       |
| Number: 1                      | Group of collection: zhangheng20140103 |
| Times of injection: 3          | Processing time: 2014-1-16 14:55:51    |
| Volume of injection: 5.00 µL   | Processing method: zhhP3OMer2          |
| Runtime: 120.0 Minutes         | Channel name: Wvin Ch1                 |
| Sample group's name:           | Processing channel notes: PDA 254.0 nm |

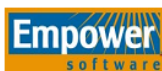

用户名称: System

项目名称: A2014

#### 进样综合报告 报告

#### 样品信息

|        |                   |         |                    |
|--------|-------------------|---------|--------------------|
| 样品名称:  | zhangheng14011610 | 采集者:    | System             |
| 样品类型:  | 未知                | 采集时间:   | 2014-1-16 14:36:28 |
| 瓶号:    | 1                 | 采集方法组:  | zhangheng20140103  |
| 进样次数:  | 3                 | 处理日期:   | 2014-1-16 14:55:51 |
| 进样体积:  | 5.00 ul           | 处理方法:   | zhhP3OMer2         |
| 运行时间:  | 120.0 Minutes     | 通道名称:   | Wvin Ch1           |
| 样品组名称: |                   | 处理通道注释: | PDA 254.0 纳米       |

#### 自动标尺色谱图

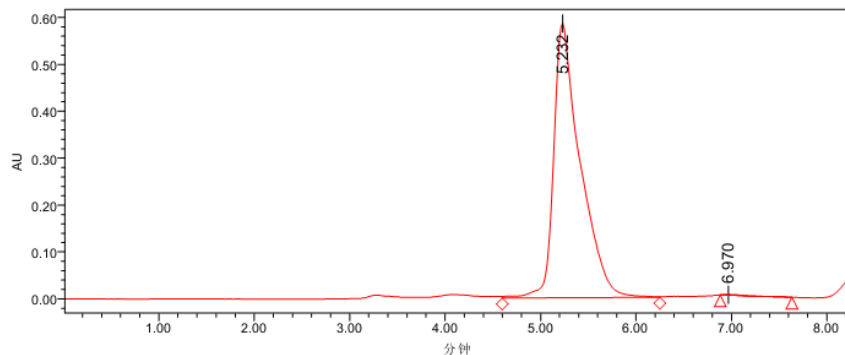

#### 处理通道: PDA 254.0 纳米

|   | 处理通道         | 保留时间<br>(分钟) | 面积       | % 面积  | 峰高     |
|---|--------------|--------------|----------|-------|--------|
| 1 | PDA 254.0 纳米 | 5.232        | 11330312 | 99.82 | 585201 |
| 2 | PDA 254.0 纳米 | 6.970        | 20160    | 0.18  | 1302   |

#### Processing channel: PDA 254.00 nm

|   | Processing channel | Retention time<br>(minute) | Area     | Area % | Peak height |
|---|--------------------|----------------------------|----------|--------|-------------|
| 1 | PDA 254.0 nm       | 5.232                      | 11330312 | 99.82  | 585201      |
| 2 | PDA 254.0 nm       | 6.970                      | 20160    | 0.18   | 1302        |
